# Supplementary material for: Homo- and Hetero-Dimers of CAD Enzymes Regulate Lignification and Abiotic Stress Response in Moso Bamboo
Source: MDPI journal article supplement (doi:10.3390/ijms222312917), 2021-11-29

## File S2: Uncropped and cropped western blot figures

- Uncropped image of Input total proteins detected with anti-HA

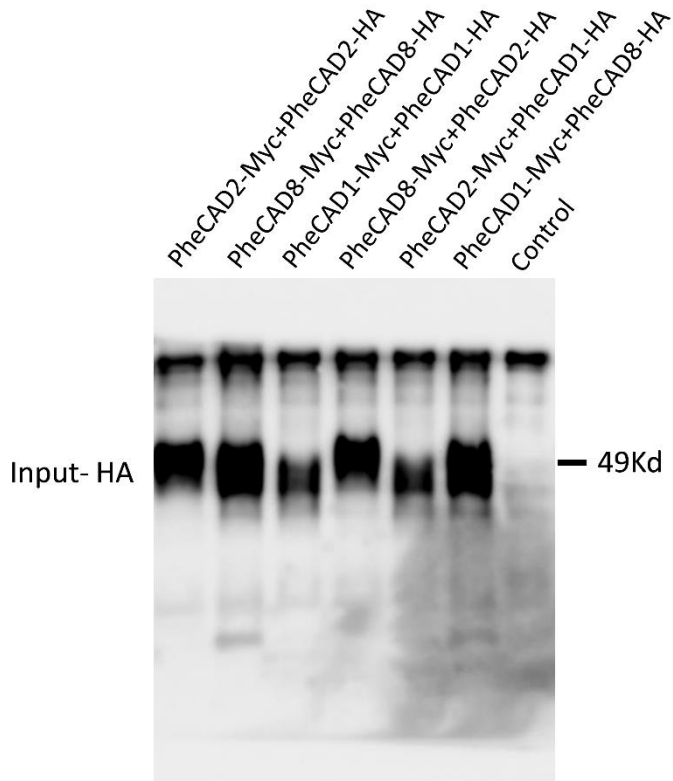

- Cropped image of Input total proteins detected with anti-HA

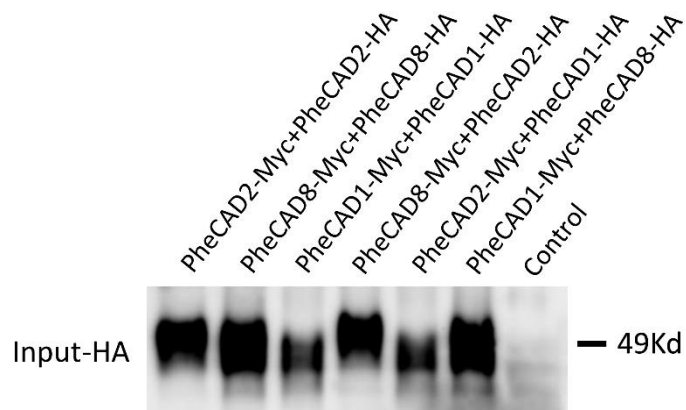

- Uncropped figure of Input total proteins detected with anti-Myc

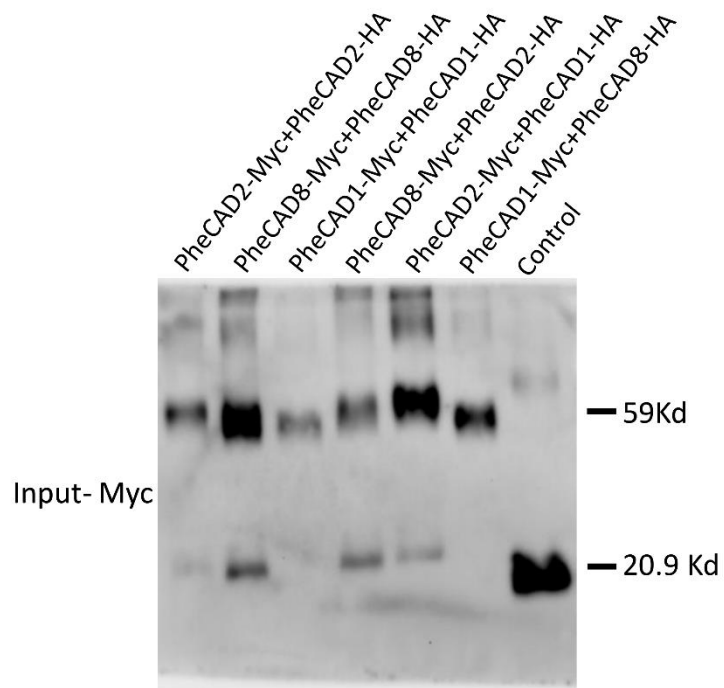

- Cropped figure of Input total proteins detected with anti-Myc

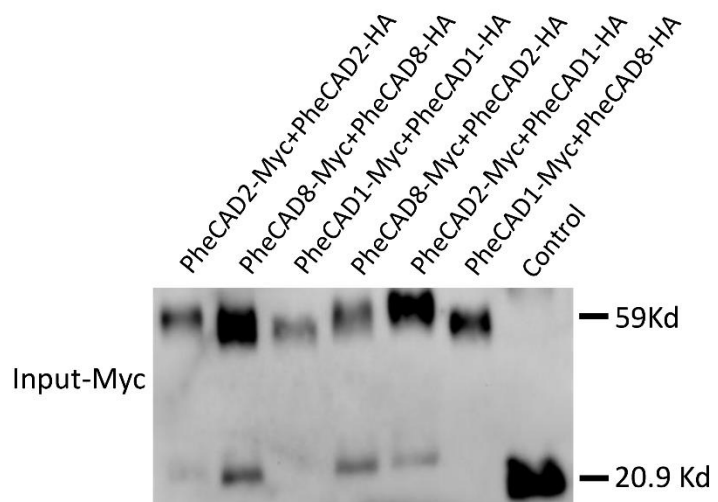

- Uncropped figure of IP proteins detected with anti-HA

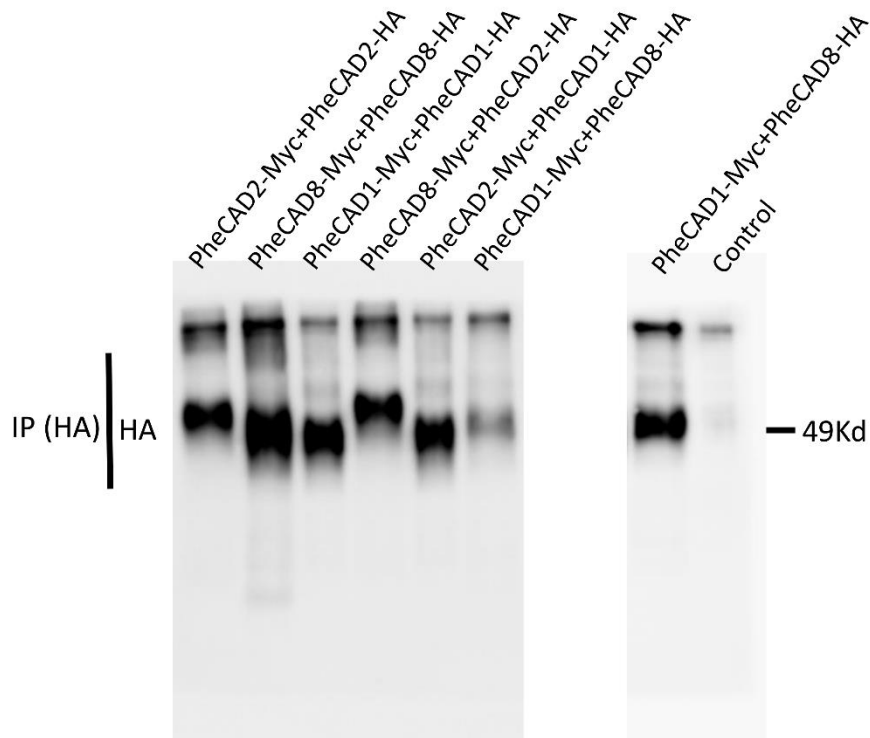

- Cropped figure of IP proteins detected with anti-HA

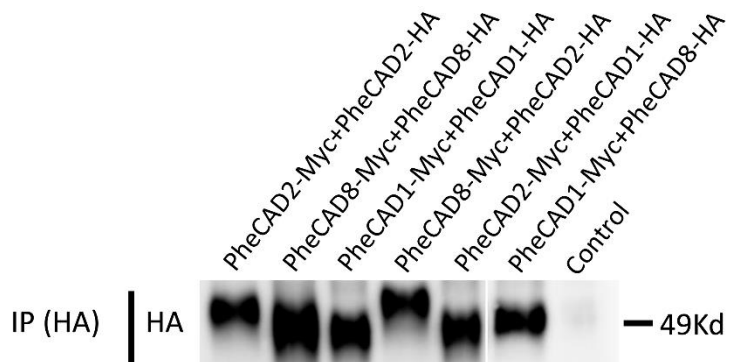

- Uncropped figure of IP proteins detected with anti-Myc

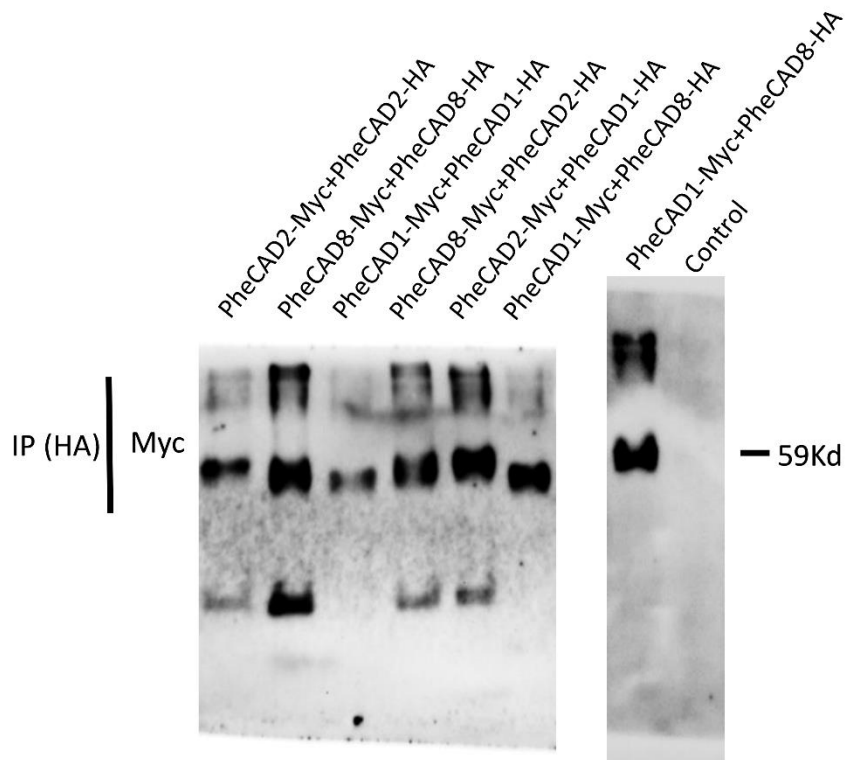

- Cropped figure of IP proteins detected with anti-Myc

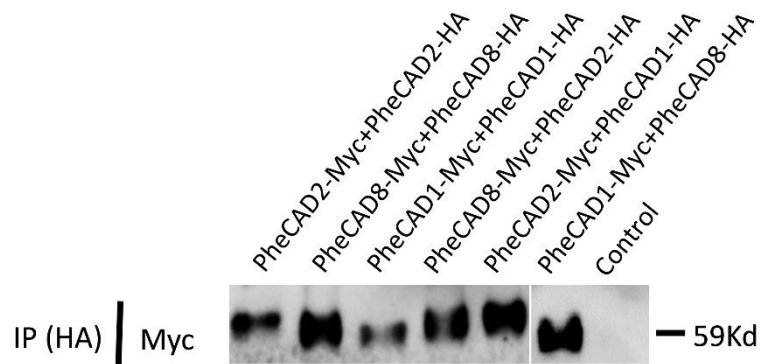

Supplement: s1 [file s1]
