# Supplementary material for: Homo- and Hetero-Dimers of CAD Enzymes Regulate Lignification and Abiotic Stress Response in Moso Bamboo
Source: MDPI journal article supplement (doi:10.3390/ijms222312917), 2021-11-29
Supplement: s1 [file s1]

**File S1: Alignment file of all CAD enzymes used in this study**

|                           | <u>GHEXXGXXXXV</u>                                             | <u>GDXXXXXXXXXXXXXX</u> |
|---------------------------|----------------------------------------------------------------|-------------------------|
| Rgu021554                 | SDMFAKEGVMPTPFPIVPGHEVVLVDVAVGEGVLGSWSAGDRVGVGVFGGACYHCDRCR    | 99                      |
| Gan031993                 | ADVIWTQNKHNDSMYPLVPGHEIVGVVRDVGSDVK-CFKVGDHVGVTYVNSCGDCENCN    | 122                     |
| OsCAD4_LOC_Os11g40690.1   | ADVIWTRNMFNDISIYPLVPGHEIAGVVEVGADVK-GFKVGDH-----DCENCN         | 96                      |
| Bam015552.1               | GDVIWTRNKHNSMYPLVPGHEIAGVVEVGSEVK-GFKVGDHVGVTYVNSCQDCENCN      | 114                     |
| OsCAD1.1_LOC_Os10g11810.1 | ADVAVTRNLIINNSMYPLVPGHEIAGVVEVGADVK-SFKVGDHVGVTYVNSCRDCENCN    | 107                     |
| OsCAD1.3_LOC_Os10g11810.3 | -----MKLCLNFNMRSHEIAGVVEVGADVK-SFKVGDHVGVTYVNSCRDCENCN         | 50                      |
| Ola036924.1               | ADVAVTRNMLNNSMYPLVPGHEIAGVVEVGSDVK-GFKVGDHVGVTYVNSCRDCEYCD     | 107                     |
| Rgu012272                 | ADVAVTRNMLNNSMYPLVPGHEIAGVVEVGSNVK-GFKVGDHVGVTYVNSCRDCECCN     | 107                     |
| Bam025746.1               | ADVAVTRNMHTDSMYPLVPGHEIAGVVEVGSAVE-RFKVGDHVGVTYVNSCRDCENCN     | 197                     |
| PH02Gene48685.t1          | ADVAVTHNMLNNSMYPLVPGHEIAGVVEVGSDVK-GFKVGDHVGVTYVNSCRDCEICN     | 107                     |
| PH02Gene44682.t1          | ADVWVTRNMHNDSMYPLVPGHEIAGVVEVGSDVK-GFKVGDHVGVTYVNSCRDCESC      | 107                     |
| PH02Gene46268.t1          | ADVWVTRNMHNDSMYPLVPGHEIAGVVEVGSDVK-GFKVGDHVGVTYVNSCRDCESC      | 107                     |
| Ola035994.1               | TDIHQAKNDLGASKYPMVPGHEVVGVEVVGPEVT-KFRAGEVVGVGIVGCCRCRCPCK     | 105                     |
| Rgu003339                 | TDIHQAKNDLGASKYPMVPGHEVVGVEVVGPEVT-KCRAGDVVGVGIVGCCRECRPCK     | 77                      |
| OsCAD2-1_Os02t0187800-01  | TDIHQAKNHLGASKYPMVPGHEVVGVEVVGPEVT-KYSAGDVVGVGIVGCCRECHPCK     | 107                     |
| OsCAD2-2_Os02t0187800-02  | TDIHQAKNHLGASKYPMVPGHEVVGVEVVGPEVT-KYSAGDVVGVGIVGCCRECHPCK     | 66                      |
| Gan017720                 | TDIHQAKNELGGSKYPMVPGHEVVGVEVVGPEVS-RYRAGDIVGVGIVGCCRECRPCK     | 98                      |
| Bam010499.1               | TDIHQAKNELGASKYPMVPGHEVVGVEVVGPEVT-KYRAGDVVGVGIVGCCRECRPCK     | 107                     |
| PH02Gene39617.t1          | TDIHQAKNELGASKYPMVPGHEVVGVEVVGPDVT-RYRAGDVVGVGIVGCCRECHPCK     | 107                     |
| PH02Gene04778.t1          | TDIHQAKNELGASKYPMVPGHEVVGVEVVGPEVT-KYRAGDVVGVGIVGCCRECRPCK     | 107                     |
| Bam007854.1               | TDIHQAKNELGASKYPMVPGHEVVGVEVVGPEVT-KYRAGDVVGVGIVGCCRECRPCK     | 107                     |
| OsCAD6_LOC_Os04g15920.1   | TDLHFIHNDWGITMYPVVPGHEITGVTKVGTNVA-GFKVGDHVGVGICIAASCLDCEHCR   | 108                     |
| Ola016985.1               | TDLHFIHNDWGITMYPVVPGHEITGVTKVGTNVS-GLKAGDRVGVGICIAASCLDCEHCR   | 92                      |
| Bam039144.1               | SDLHFIHNDWGITMYPVVPGHEITGVTKVGTNVS-GFKVGDHVGVGICIAASCLDCEHCR   | 92                      |
| Bam034885.1               | SDLHFIHNDWGITMYPVVPGHEITGVTKVGTNVS-GFKVGDHVGVGICIAASCLDCEHCR   | 108                     |
| Bam039795.1               | TDLHFIHNDWGITMYPVVPGHEITGVTKVGTNVS-GFKVGDHVGVGICIAASCLDCEHCR   | 108                     |
| PH02Gene48202.t1          | SDLHFIHNDWGITMYPVVPGHEITGVTKVGTNVS-GFMVGDHVGVGICIAASCLDCEHCR   | 108                     |
| PH02Gene49901.t1          | TDLHFIHNDWGITMYPVVPGHEITGVTKVGTNVS-GFMVGDHVGVGICIAASCLDCEHCR   | 108                     |
| Gan014390                 | TDLHFIHNDWGITMYPVVPGHEITGMVTKVGTNVS-GFMVGDHVGVGICIAASCLDCEHCR  | 108                     |
| Rgu008819                 | SDLSTIKNEWGNAKYPVVPGHEIVGVVTDVGPSVT-RFKAGDNVGVGYMASACRDCANCQ   | 113                     |
| OsCAD9_LOC_Os03g12270.1   | SDLSTIKNEWGNAKYPVVPGHEIVGVVAVGVSSVA-RFAAGDTVGVGYIASTCRACANCQ   | 105                     |
| Gan006403                 | -----MVGVAEVSSTVT-RFNVDKVGVGVIASCTCRACPSQ                      | 37                      |
| Ola001888.1               | SDLSTIKNEWGNAKYPVVPGHEIVGVVTDVGASVT-RFKAGDNVGVGYIASACRACNTCL   | 104                     |
| PH02Gene26598.t1          | TDLSTIKNEWGNAKYPVVPGHEIVGVVTEVGSSVT-RFKAGDKVGVGVIASCTCRACPNQ   | 104                     |
| Bam045387.3               | SDLSTIKNEWGNAQYPVVPGHEIVGVVTEVGSSVT-RFKAGDKVGVGVIASCTCRACPNQ   | 712                     |
| OsCAD8B_LOC_Os09g23540.1  | TDLHVVKNDWGNAMYPPVPGHEIVGVVTVGVAGVT-KFKAGDTVGVGFFVGSCTCDSCG    | 180                     |
| OsCAD8C1_LOC_Os09g23550.1 | TDLHIVKNDWGNAMYPPVPGHEIVGVVTVGVAGVT-KFKAGDTVGVGFFVASCRCGCCG    | 180                     |
| OsCAD8C2_LOC_Os09g23550.2 | -----MYPVVPGHEIVGVVTVGVAGVT-KFKAGDTVGVGFFVASCRCGCCG            | 46                      |
| Ola032369.1               | TDLHVIKNDWGNALYPVVPGHEILGIVADVGSVVK-KFKAGDTVGVGFFVGSCTCDSCG    | 104                     |
| Rgu014373                 | TDLHVIKNDWGNALYPVVPGHEIVGVVAGVGSVVK-KFKAGDTVGVGFFVGSCTCDSCG    | 105                     |
| Gan002573                 | TDLHI IKNDWGNALYPVVPGHEILGVVVDVGSVVK-KFKAGDTVGVGFFVGSCTCDSCG   | 79                      |
| Gan004029                 | TDLHI IKNDWGNALYPVPGHEIVGVVADVGSVVK-KFKAGDTVGVGFFVGSCTCDSCG    | 77                      |
| PH02Gene13789.t1          | TDLHI IKNDWGNALYPVVPGHEILGVVDVGSVVK-KFKAGDTVGVGFFVGSCTCDSCG    | 104                     |
| Bam027739.1               | TDLHI IRNDWGNALYPVVPGHEILGVVAGVGSVVK-KFKAGDTVGVGFFVGSCTCDSCG   | 159                     |
| OsCAD8A_LOC_Os09g23530.1  | TDLHTIKNEWGNAMYPPVPGHEIVGVVAGVAGVT-RFKAGDTVGVGFFVDSCTCDSCG     | 105                     |
| OsCAD8D_LOC_Os09g23560.1  | TDLHI IKNEWGNAMYPPVPGHEIVGVVTVGVAGVT-KFKAGDTVGVGFFVGSCTCDSCG   | 105                     |
| Bam027740.1               | TDLHI IKNEWGNAMYPPVPGHEVVGIVTDVGRGVK-NFKTGETVGVGFFVDSCTCDSCS   | 105                     |
| Bam040591.1               | TDLHI IKNEWGNALYPVVPGHEVVGIVTDVGRGVK-NFKAGETVGVGFFVDSCTCDSCS   | 104                     |
| PH02Gene13790.t1          | SDLHTIKNEWGNAMYPPVPGHEVVGIVTDVGRSVK-NFKAGETVGVGFFVDSCTCDSCS    | 219                     |
| PH02Gene13791.t1          | TDLHTIKNEWGNAMYPPVPGHEVVGIVTDVGRGVK-NFKAGETVGVGFFVDSCTCDSCS    | 105                     |
| OsCAD3_LOC_Os10g29470.1   | SDLHC IKNEWKHSIYPLVPGHEIAGVVEVGKNVT-RFKAGDRVGVGCMVNSCRSCECN    | 113                     |
| OsCAD5_LOC_Os08g16910.1   | SDLHS IKNEWKNATYPLVPGHEIAGVVEAGKNVT-KFKGGDKVGVGCMVNSCHSCDSCN   | 103                     |
| Rgu015472                 | SDLHS IKNEWKNATYPLVPGHEIAGVVEVGKNVT-KFTAGEKVGVGCMVNSCHSCDSCN   | 126                     |
| Ola032840.1               | SDLHS IKNDWKNTIYPIVPGHEIAGVVEVGKNVT-RLNVGDKVGVGIVNSCQSCESC     | 114                     |
| PH02Gene38471.t1          | SDLHS IKNEWKNATYPIVPGHEIAGVVEVGKNVT-KFKAGDKVGVGCMVNSCQSCESC    | 113                     |
| Bam005700.1               | SDLHS IKNDWKNAIYPIVPGHEIAGVVEVGKNVT-KFKAGDKVGVGCMVNSCQSCESC    | 114                     |
| Bam017920.1               | SDLHS IKNDWKNAIYPIVPGHEIAGVVEVGKNVT-KFKAGDKVGVGCMVNSCQSCESC    | 114                     |
| PH02Gene38470.t1          | SDLHS IQNEWKNATYPIVPGHEIAGVVEVGNNVT-KFKAGDKVGVGCMVNSCQSCESC    | 111                     |
| Bam032152.1               | SDLHI IKNEWKNATYPIVPGHEIAGVVEVGKNVT-NFRAGDKVGVGCMVNSCQSCGSCN   | 114                     |
| Rgu021750                 | SDLHS IKNEWKNATYPIVPGHEIAGVVEVGKNVT-KFKAGDKVGVGCMVNSCQSCDNCN   | 66                      |
| Gan024020                 | SDLHS IKNEWKNATYPIVPGHEIAGVVEVGKNVT-KFKAGDKVGVGCMVNSCQSCDNCN   | 77                      |
| OsCAD7_Os04t0612700-01    | SDLHTIKNEWKNATYPIVAGHEITGVVTEVGKNVA-RFKAGDEVVGCMVNTCGGCESC     | 120                     |
| Ola022375.1               | SDLHTIKNEWKNATYPIVPGHEIVGVIAEVGEKVE-RFKAGDKVGVGCMVNTCQSCESC    | 116                     |
| Bam022082.1               | SDLHTIKNEWRSATYPIVAGHEIVGLINEVGKNVQ-EFKVGDVGVGCMVNTCQSCESC     | 115                     |
| PH02Gene32740.t1          | SDLHTIKNEWKNATYPIVAGHEIVGLITEVGKNVQ-MFKAGDKVGVGCMVNTCQSCESC    | 113                     |
| Bam044253.1               | SDLHTIKNEWKNATYPIVAGHEIVGLITEVGKNVQ-KFKAGDKVGVGCMVNTCQSCESC    | 111                     |
| Rgu006342                 | TDLHHLRIT-ADSVFPLVPGHEFVGEVAAVGEVET-AHAVGDPVAVGNIVDSCGECRRR    | 78                      |
| Rgu008067                 | SDIHQVGEWGGETFFMPVPGHEIIGTVAEVGSDVT-EHAVGDTVGVGCFVDSCLECEACQ   | 180                     |
| Rgu021228                 | SDIHQARGEWGGESFFMPVPGHEIVGEVVEVGSVAVS-GHAVGDLVGVGCFVDSCLECEACQ | 112                     |
| Rgu020259                 | SDIHTVKGDFGQPPFVPGHEIVGRVAVGVDEVT-THRVDGDRVGGLVNSCRECVNCR      | 102                     |
| Rgu021242                 | SDIHQARNEWGGSEFFMPVPGHEIAGTVSAVGAEVS-QYAVGDRVGVGCFVDSCRECDNCR  | 109                     |

. \* : \* \* \* : \* \*

Rgu021554  
 Gan031993  
 OsCAD4\_LOC\_Os11g40690.1  
 Bam015552.1  
 OsCAD1.1\_LOC\_Os10g11810.1  
 OsCAD1.3\_LOC\_Os10g11810.3  
 Ola036924.1  
 Rgu012272  
 Bam025746.1  
 PH02Gene48685.t1  
 PH02Gene44682.t1  
 PH02Gene46268.t1  
 Ola035994.1  
 Rgu003339  
 OsCAD2-1\_Os02t0187800-01  
 OsCAD2-2\_Os02t0187800-02  
 Gan017720  
 Bam010499.1  
 PH02Gene39617.t1  
 PH02Gene04778.t1  
 Bam007854.1  
 OsCAD6\_LOC\_Os04g15920.1  
 Ola016985.1  
 Bam039144.1  
 Bam034885.1  
 Bam039795.1  
 PH02Gene48202.t1  
 PH02Gene49901.t1  
 Gan014390  
 Rgu008819  
 OsCAD9\_LOC\_Os03g12270.1  
 Gan006403  
 Ola001888.1  
 PH02Gene26598.t1  
 Bam045387.3  
 OsCAD8B\_LOC\_Os09g23540.1  
 OsCAD8C1\_LOC\_Os09g23550.1  
 OsCAD8C2\_LOC\_Os09g23550.2  
 Ola032369.1  
 Rgu014373  
 Gan002573  
 Gan004029  
 PH02Gene13789.t1  
 Bam027739.1  
 OsCAD8A\_LOC\_Os09g23530.1  
 OsCAD8D\_LOC\_Os09g23560.1  
 Bam027740.1  
 Bam040591.1  
 PH02Gene13790.t1  
 PH02Gene13791.t1  
 OsCAD3\_LOC\_Os10g29470.1  
 OsCAD5\_LOC\_Os08g16910.1  
 Rgu015472  
 Ola032840.1  
 PH02Gene38471.t1  
 Bam005700.1  
 Bam017920.1  
 PH02Gene38470.t1  
 Bam032152.1  
 Gan021750  
 Gan024020  
 OsCAD7\_Os04t0612700-01  
 Ola022375.1  
 Bam022082.1  
 PH02Gene32740.t1  
 Bam044253.1  
 Rgu006342  
 Rgu008067  
 Rgu021228  
 Rgu020259  
 Rgu021242

# XXXX

RGDFTICENGRI-----PGVTFDGGYAEALVVPADALARVPD-----ELGA 140  
 SFLENYCSN-TVFTFNRIID---TDGSVTMGGYSNHIVVRQRYCFKIPD-----GYPL 170  
 SSLENHCSK-CVVITYNSVD---SDGTVTKGGYSSHILVHQRYCFKIPA-----DYPL 144  
 SFLENHCSK-FVFTYNSID---TDGTVTKGGYSSHIVVHERYCHKIPD-----GYPL 162  
 SSLENYCSQ-HVFTFNGVD---TDGTVTKGGYSTHIVVHERYCFKIPD-----GYPL 155  
 SSLENYCSQ-HVFTFNGVD---TDGTVTKGGYSTHIVVHERYCFKIPD-----GYPL 98  
 SFLENHCSK-FVFTFNGVD---TDGAVTKGGYSTHIVVHERYCFKIPD-----GYPL 155  
 SFLENHCSN-FVFTFNGID---ADGTVTKGGYSTHIVVHERYCFKIPD-----GYPL 155  
 SFLEIHCSN-FVFTFNGVD---TDGTVTKGGYSTHIVVHERYCFKIPD-----GYPL 245  
 SFLENHCSK-HVFTFNGVD---TDGTVTKGGYSTHIVVHERYCFKIPD-----GYPL 155  
 SFLEVHCSK-FVSTFNGVD---TDGTVTKGGYSTHIVVHKRYCFKIPD-----GYPL 155  
 SFLENHCSK-FVFTFNGVD---TDGTVTKGGYSTHIVVHERYCFKIPD-----GYPL 155  
 ANVEQYCNK-RIWSYNDVY---TDGRPTQGGFSSAMVVDQKFVVKVPD-----GLAP 153  
 ANVEQYCNK-RIWSYNDVY---TDGRPTQGGFSSAMVVDQKFVVKVPA-----GLAP 125  
 ANVEQYCNK-RIWSYNDVY---TDGRPTQGGFASAMVVDQKFVVKIPA-----GLAP 155  
 ANVEQYCNK-RIWSYNDVY---TDGRPTQGGFASAMVVDQKFVVKIPA-----GLAP 114  
 ANVEQYCNK-KIWSYNDVY---TDGRPTQGGFSSAMVVDQKFVVKVPA-----GLAP 146  
 ANVEQYCNK-RIWSYNDVY---TDGRPTQGGFASTMVVDQKFVVKVPA-----GLAP 155  
 ANVEQYCNK-RIWSYNDVY---TDGRPTQGGFSSAMIVDQKFVVKVPV-----GLAP 155  
 ANVEQYCNK-KIWSYNDVY---TDGRPTQGGFSSAMVVDQKFVVKIPV-----GLAP 155  
 ANVEQYCNK-KIWSYNDVY---TDGRPTQGGFSSAMIVDQKFVVKVPA-----GLAP 155  
 RSEENYCDK-VALTYNGIF---WDGSITYGGYSNMLVAHKRFVVRIPD-----TLPL 156  
 RSEENYCDK-VTLTYNGIF---WDGSVTYGGYSSMLVAHKRFVVRIPD-----NLPL 140  
 RSEENYCDK-VALTYNGIF---WDGSVTYGGYSNMLVAHKRFVVRIPD-----NLPL 140  
 RSEENYCDK-VALTYNGIS---WDGSVTYGGYSNMLVAHKRFVVRIPD-----NLPL 156  
 RSEENYCDK-VTLTYNGIF---WDGSVTYGGYSNMLVAHKRFVVRIPD-----NLPL 156  
 SSEENYCDK-VTLTYNGIF---WDGSVTYGGYSNMLVSHKRFVVRIPD-----NLPL 156  
 SSEENYCDK-VTLTYNGIF---WDGSVTYGGYSNMLVAHKRFVVRIPA-----NLPL 156  
 RSEENYCDK-VTLTYNGIF---WDGSVTYGGYSNMLVAHKRFVVRIPD-----NLPL 156  
 EGFENYCNK-LVPSFNSAL---PDAAAVHGGFSELAVVHEHFVLRIPG-----ASPL 161  
 DGFENYCNK-LVPSFNSAL---PDGATVHGGFSELAVVNQRYVVRIPG-----GGGGASPAPL 159  
 EGFENYCNK-LVPSFNSAL---PDGTVKHGGFSELAVVHEHFVLRIPD-----ASPL 85  
 EGFENYCNK-LVPSFNSAL---PDGATVHGGFSELAVVHEHFVLRIPD-----ASPL 152  
 EGFENYCNK-LVPSFNSAL---PDGATVHGGFSELAVVHEHFVLRIPD-----ASPL 152  
 EGFENYCNK-LVPSFNSAL---PDGAKVHGGFSELAVVHEHFVLRIPD-----ASPL 760  
 KGYENYCNK-MVITSNGKD---YGGAAATQGGFSDAIVVNEHYVLRVPA-----GLPL 228  
 NGYENYCNK-MVITTCNGVDHDHGGGAATQGGFSDAIVVNEHYVLRVPA-----GLPL 231  
 NGYENYCNK-MVITTCNGVDHDHGGGAATQGGFSDAIVVNEHYVLRVPA-----GLPL 97  
 KGYENYCNK-MVLTSGVDQEHG-GEVTKGGFSDVMVNVNEDYVVRVPD-----GLPL 154  
 KGYENYCNK-MVLTSGVDKEHG-GEVTKGGFSDVMVNVNEDYVVRVPD-----GLAL 155  
 KGYEQYCNK-VVFTSNGVDHDG-GAVTQGGFSDVMVNVNEDYVVRVPD-----GLPL 129  
 KGYENYCNK-MVLTSGVDREHG-GAVTQGGFSDVMVNVNEDYVVRVPD-----GLPL 127  
 KGYEQYCNK-MVLTSGVDHDG-GAVTQGGFSDVMVNVNEDYVVRVPD-----GLPL 154  
 KGYEQYCNK-MVLTSGVDHDG-GAVTQGGFSDVMVNVNEDYVVRVPD-----GLPL 209  
 KGDENYCNK-MVITSNGTD---YGGATQGGFSDVMVVRQDYVLRVPA-----SLPP 153  
 KGYENYCNK-MVITSNGTD---YGGATQGGFSDVMVVRQDYVVRVPA-----SLPP 153  
 KGYENYCNK-LVPTSNGVD---YDGATTLGGFSDVLVNVQDYVLRVPE-----SLPL 153  
 KGHENYCNK-LVLTSGVD---YDGATQGGFSDIVVNVQDYVVRVPE-----SLPL 152  
 KGYGNYCNK-LVPTSNGVD---YDGATTLGGFSDVVVNQDYVVRVPE-----SLPL 267  
 KGYENYCNK-LVLTSGVD---YDGATTLGGFSDVVVNQDYVVRVPE-----SLPL 153  
 NGFENHCPG-GVFTYNSVD---KDGTVTYGGYSSMVVHERFVVRFPD-----AMPL 161  
 QGLENHCPG-VIFTYNSVD---KDGTVTYGGYSSMVVHERFVVRFPD-----AMPL 151  
 QGFENHCPG-IILTYNSVD---LDGTVTYGGYSSMVVHERFVVRFPD-----AMPL 174  
 QGFENLCPG-IILTYNSVD---RDGTVTYGGYSSMVVHERFVVRFPD-----AMPL 162  
 EGFENHCPG-IIFTYNSVD---RDGTVTYGGYSTMVVHERFVVRFPD-----AMPL 161  
 EGFENHCPG-MIFTYNSVD---RDGTVTYGGYSTMVVHERFVVRFPD-----AMPL 162  
 EGFENHCPG-MIFTYNSVD---RDGTVTYGGYSTMVVHERFVVRFPD-----AMPL 162  
 EGFENHCPG-MIFTYNSVD---RDGTVTYGGYSTMVVHERFVVRFPD-----AMPL 159  
 EGFENHCPG-SIFTYNSVD---RDGTVTYGGYSTMVVHERFVVRFPD-----AMPL 162  
 DGFENHCPG-IIFTYNSVD---RDGTVTYGGYSTMVVHERFVVRFPD-----AMPL 114  
 EGFENHCPG-IIFTYNSVD---RDGTVTYGGYSTMVVHERFVVRFPD-----AMPL 125  
 DGCENYCSGGVFTYNSVD---RDGTRTYGGYSDAVVVSQRFVVRFPSSAGGAGAALPL 177  
 EGAENYCSR-IVFTYNSRD---RDGTVTYGGYSDLVVVSERFVVRFPD-----GLPL 164  
 EGSENYCSR-IVFTYNSLD---RDGTTTYGGYSDLVVVSERFVVRFPD-----GLPL 163  
 EGSENYCSR-IVFTYNSLD---RDGTTTYGGYSDLVVVSERFVVRFPD-----GLPL 161  
 EGSENYCSR-IVFTYNSLD---KDGTTTYGGYSDLVVVSERFVVRFPD-----GLPL 159  
 EGQENWCPAYVLTAGRDR---HDGSRTLGGYSGEYVVRERFVHARPT-----DLDP 127  
 DGEEQYCTKGVVQTYNDEA---YDGEKTFGGYSAQVVRDHFVVRVPE-----GMDL 229  
 DGEEQFCSKGVVQTYNDQG---YDDEPTHGGYSQVVRDHFVVRIPD-----GVDL 161  
 NGDEQYCLDGSVPTYAGTD---RDGTTTQGGYSTHVVDADFLVRVPA-----GIDP 151  
 AGEEQFCTKGQVQTYNGRE---YTGEQTFGGYSTQVVVDENYVLRIPD-----GVEL 158

\*
 \*\*::
 :
 \*

Rgu021554  
Gan031993  
OsCAD4\_LOC\_Os11g40690.1  
Bam015552.1  
OsCAD1.1\_LOC\_Os10g11810.1  
OsCAD1.3\_LOC\_Os10g11810.3  
Ola036924.1  
Rgu012272  
Bam025746.1  
PH02Gene48685.t1  
PH02Gene44682.t1  
PH02Gene46268.t1  
Ola035994.1  
Rgu003339  
OsCAD2-1\_Os02t0187800-01  
OsCAD2-2\_Os02t0187800-02  
Gan017720  
Bam010499.1  
PH02Gene39617.t1  
PH02Gene04778.t1  
Bam007854.1  
OsCAD6\_LOC\_Os04g15920.1  
Ola016985.1  
Bam039144.1  
Bam034885.1  
Bam039795.1  
PH02Gene48202.t1  
PH02Gene49901.t1  
Gan014390  
Rgu008819  
OsCAD9\_LOC\_Os03g12270.1  
Gan006403  
Ola001888.1  
PH02Gene26598.t1  
Bam045387.3  
OsCAD8B\_LOC\_Os09g23540.1  
OsCAD8C1\_LOC\_Os09g23550.1  
OsCAD8C2\_LOC\_Os09g23550.2  
Ola032369.1  
Rgu014373  
Gan002573  
Gan004029  
PH02Gene13789.t1  
Bam027739.1  
OsCAD8A\_LOC\_Os09g23530.1  
OsCAD8D\_LOC\_Os09g23560.1  
Bam027740.1  
Bam040591.1  
PH02Gene13790.t1  
PH02Gene13791.t1  
OsCAD3\_LOC\_Os10g29470.1  
OsCAD5\_LOC\_Os08g16910.1  
Rgu015472  
Ola032840.1  
PH02Gene38471.t1  
Bam005700.1  
Bam017920.1  
PH02Gene38470.t1  
Bam032152.1  
Gan021750  
Gan024020  
OsCAD7\_Os04t0612700-01  
Ola022375.1  
Bam022082.1  
PH02Gene32740.t1  
Bam044253.1  
Rgu006342  
Rgu008067  
Rgu021228  
Rgu020259  
Rgu021242

**GXXXGXXGLGGXGHXXVXXXKXXGXXVTVXSX**

EEAAPLLCAGVTTFHALRSSPLR---PGDLVAVQGIIGGLGHLGIQFAARMGCEVVAISR 196  
AEAAPLLCAGITVYTPMMWHNMN---QPGKSLGVIGLGGGLGHMAVKFGKAFGLNVTVFST 227  
SKAAPLLCAGITVYTPMIRHNMN---QPGKSLGVIGLGGGLGHMAVKFGKAFGLKVTVFST 201  
AEAAPLLCAGITVYTPMMRHNMN---QHGKSLGVIGLGGGLGHMAVKFGKAFGLKVTVFST 219  
EKAAPLLCAGITVYSPMMRHNMN---QPGKSLGVIGLGGGLGHMAVKFGKAFGLKVTVIST 212  
EKAAPLLCAGITVYSPMMRHNMN---QPGKSLGVIGLGGGLGHMAVKFGKAFGLKVTVIST 155  
AKAAPLLCAGITVYTPMMRHQMN---QPGKSLGVIGLGGGLGHMAVKFGKAFGLKVTVFST 212  
AKAAPLLCAGITVYTPMMRHKMN---QPGKSLGVIGLGGGLGHMAVKFGKAFGLKVTVFST 212  
AKAAPLLCAGITVYTPMMRHNMN---QPGKSLGVIGLGGGLGHMAVKFGKAFGLKVTVFST 302  
AKAAPLLCAGITVYTPMMRHNMN---QPGKSLGIIIGLGGGLGHMAVKFGKAFGLKVTVFST 212  
AKAAPLLCAGITVYTPMMRHNMN---QPGKSLGIIIGLGGGLGHMAVKFGKAFGLKVTVFST 212  
AKAAPLLCAGITVYTPMMRHNMN---QPGKSLGIIIGLGGGLGHMAVKFGKAFGLKVTVFST 212  
EQAAPLLCAGVTVYSPMKHFGML---TPGLRGGILGLGGVGHMGVVKVAKSMGHHVTVISS 210  
EQAAPLLCAGVTVYSPMKHFGML---AAGLRGGILGLGGVGHMGVVKVAKSGHHVTVISS 182  
EQAAPLLCAGITVYSPMKHFGML---SPGLRGGVGLGGVGHMGVVKVAKSMGHHVTVISS 212  
EQAAPLLCAGITVYSPMKHFGML---SPGLRGGVGLGGVGHMGVVKVAKSMGHHVTVISS 171  
EQAAPLLCAGVTVYSPMKHFGML---APGLRGGILGLGGVGHMGVVKVAKSMGHHVTVISS 203  
EQAAPLLCAGVTVYSPMKHFGML---SPGLRGGILGLGGVGHMGVVKVAKSMGHHVTVISS 212  
EQAAPLLCAGVTVYSPMKHFGML---APGLRGGILGLGGVGHMGVVKVAKSMGHHVTVISS 212  
EQAAPLLCAGVTVYSPMKHFGML---APGLRGGILGLGGVGHMGVVKVAKSMGHHVTVISS 212  
EQAAPLLCAGITVYSPMKHFGML---APGLRGGILGLGGVGHMGVVKVAKSMGHHVTVISS 212  
DAAAPLLCAGITVYSPMKQHGMQADAAAGRRLLGVVGLGGGLGHVAVKFGKAFGLHVTVIST 216  
DAAAPLLCAGITVYSPMKQHGMQLQ---AGRTLGVVGLGGGLGHVAVKFGKAFGLRVTVIST 197  
DAAAPLLCAGITVYSPMKQHGMQLQ---AGRRLGVVGLGGGLGHVAVKFGKAFGLGVTVIST 197  
DAAAPLLCAGITVYSPMKQHGMQLQ---AGRRLGVVGLGGGLGHVAVKFGKAFGLRVTVIST 213  
DAAAPLLCAGITVYSPMKQHGMQLQ---AGRRLGVVGLGGGLGHVAVKFGKAFGLRVTVIST 213  
DVAAPLLCAGITVYSPMKQHGMQLQ---AGRRLGVVGLGGGLGHVAVKFGKAFGLRVTVIST 213  
DAAAPLLCAGITVYSPMKQHGMQLQ---AGRRLGVVGLGGGLGHVAVKFGKAFGLRVTVIST 213  
DAAAPLLCAGITVYSPMKQHGMQLQ---AGRRLGVVGLGGGLGHVAVKFGKAFGLRVTVIST 213  
AAAAPLLCAGVTVYCPMRRGLD---RPGLHLGVAGLGGGLGHLAVKFGKAFGMKVTVVST 218  
DRLAPLLCAGVTVYCPMRRGLD---RPGVHLGVAGLGGGLGHLAVKFGKAFGMKVTVIST 216  
ERVAPLLCAGVTVYCPMRRGLD---RPGLHLGVVGLGGGLGHLAVKFGKTFGMKVTVIST 142  
DRVAPLLCAGVTVYCPMRRGLD---RPGLHLGVAGLGGGLGHLAVKFGKAFGMKVTVVST 209  
DRVAPLLCAGVTVYCPMRRGLD---RPGLHLGVAGLGGGLGHLAVKFAKAFGMKVTVIST 209  
DRVAPLLCAGVTVYCPMRRGLD---RAGLHLGVAGLGGGLGHLAVKFAKAFGMKVTVIST 817  
DGAAPLLCAGVTVYSPMVIHGLN---APGKHVGVVGLGGGLGHVAVKFAKAFGMKVTVIST 285  
DSAAPLLCAGVTVYSPMVIHGLN---APGKHVGVVGLGGGLGHVAVKFAKAFGMKVTVIST 288  
DSAAPLLCAGVTVYSPMVIHGLN---APGKHVGVVGLGGGLGHVAVKFAKAFGMKVTVIST 154  
DKAAPLLCAGVTVYSPMVIHGLN---EPGKHLGVVGLGGGLGHVAVKFGKAFGMKVTVIST 211  
DKAAPLLCAGVTVYSPMVIHGLN---APGKHLGVVGLGGGLGHVAVKFGKAFGMKVTVIST 212  
DKAAPLLCAGVTVYSPMVIHGLN---EPGKHLGVVGLGGGLGHVAVKFGKAFGMKVTVIST 186  
DKAAPLLCAGVTMYSPIHGLN---EPGKHLGVVGLGGGLGHIIVKFGKAFGMKVTVIST 184  
DKAAPLLCAGVTVYSPMVIHGLN---EPGKHLGVVGLGGGLGHVAVKFGKAFGMKVTVIST 211  
ERAAPLLCAGVTVYSPMVIHGLN---EPGKHLGVVGLGGGLGHVAVKFGKAFGMKVTVIST 266  
DGAAPLLCAGVTVYSPMVIHGLN---APGKHLGVVGLGGGLGHLGVKFGKAFGMKVTVISS 210  
DGAAPLLCAGVTVYSPMVIHGLN---GPGKHLGVVGLGGGLGHLGVKFGKAFGMKVTVIST 210  
DGAAPLLCAGVTVYSPMIQFGLN---APGKHLGIVGLGGGLGHMAVKFGKAFGMTVTVISS 210  
DGAAPLLCAGVTVYSPMIQFGLN---APGKHLGVVGLGGGLGHVAVKFGKAFGMTVTVISS 209  
DGAAPLLCAGVTVYSPMIQFGLN---APGKHLGVVGLGGGLGHMAVKFGKAFGMTVTVISS 324  
DGAAPLLCAGVTVYSPMIQFGLN---APGKHLGVVGLGGGLGHTAVKFGKAFGMTVTVISS 210  
DVGAPLLCAGITVYTPMKYHGLN---APGKHVGVVGLGGGLGHVAVKFAFAGLKVTVISS 218  
DKGAPLLCAGITVYSPMKYHGLN---VPSKHVGVVGLGGGLGHVAVKFAKAFGMTVTVISS 208  
DKGAPLLCAGITVYSPMKYHGLN---TPGKHVGVVGLGGGLGHVAVKFAKAFGTVTVISS 231  
DKGAPLLCAGITVYSPMKYHGLN---SPGKHVGVVGLGGGLGHVAVKFAKAFGMKVTVISS 219  
DKGAPLLCAGITVYSPMKYHGLN---APGKHVGVVGLGGGLGHVAVKFAKAFGMKVTVISS 218  
DKGAPLLCAGITVYSPMKYHGLN---APGKHVGVVGLGGGLGHVAVKFAKAFGMKVTVISS 219  
DKGAPLLCAGITVYSPMKYHGLN---APGKHVGVVGLGGGLGHVAVKFAKAFGMKVTVISS 219  
DKGAPLLCAGITVYSPMKYHGLN---EPGKHVGMVGLGGGLGHVAVKFAKAFGMKVTVISS 216  
DKGAPLLCAGITVYSPMKYHGLN---VPGKHIGVGLGGGLGHVAVKFAKAFGMKVTVISS 219  
DKGAPLLCAGISVYSPMKYHGLN---APGKHIGVGLGGGLGHVAVKFAKAFGMKVTVISS 171  
DKGAPLLCAGISVYSPMKYHGLN---APGKHIGVGLGGGLGHVAVKFAKAFGMKVTVISS 182  
DSGAPLLCAGVTVYAPMRQHGLC---EAGKHVGVVGLGGGLGHVAVKFAFAGMVTVIST 234  
DRGAPLLCAGVTVYAPMRQHGLS---EQGKHVGVVGLGGGLGHVAVKFAKAFGMKVTVIST 221  
DSGAPLLCAGITVYAPMKHHGLC---EPGKHIGVGLGGGLGHVAVKFAKAFGMKVTVIST 220  
DRGAPLLCAGITVYAPMKHHGLC---EPGKHIGVGLGGGLGHVAVKFAKAFGMKVTVIST 218  
DRGAPLLCAGITVYAPMKHHGLS---KPGKHIGVGLGGGLGHVAVKFAKAFGMKVTVIST 216  
AGVAPLLCAGITVWPEPLRAGGVG---EGTRVGVVGIIGGLGHLAVRLAAAEVTAFT 183  
AAATPLLCAGITTYHPLKEHGAG---PGKRVGVIGMGGGLGHVGVKIAAAMGADVAVLSR 285  
AATTPLLCAGITTYAPLKRHVG---SGSKVGVIGMGGGLGHVAVKIAAAMGAESVLSR 217  
AAAAPLLCAGITTYPLRRWGAG---PGRVAVVGLGGGLGHVAVKIAHAMGAEVTVLSQ 207  
DVAAPLLCAGITLYTPLHWGAG---PGKKVAVVGMGGGLGHVGVKIAHALGAEVTVLSQ 214

:\*\*\*\*\*::: : . .: \*:\*:\* .:.. :\* \* .:.

Rgu021554  
Gan031993  
OsCAD4\_LOC\_Os11g40690.1  
Bam015552.1  
OsCAD1.1\_LOC\_Os10g11810.1  
OsCAD1.3\_LOC\_Os10g11810.3  
Ola036924.1  
Rgu012272  
Bam025746.1  
PH02Gene48685.t1  
PH02Gene44682.t1  
PH02Gene46268.t1  
Ola035994.1  
Rgu003339  
OsCAD2-1\_Os02t0187800-01  
OsCAD2-2\_Os02t0187800-02  
Gan017720  
Bam010499.1  
PH02Gene39617.t1  
PH02Gene04778.t1  
Bam007854.1  
OsCAD6\_LOC\_Os04g15920.1  
Ola016985.1  
Bam039144.1  
Bam034885.1  
Bam039795.1  
PH02Gene48202.t1  
PH02Gene49901.t1  
Gan014390  
Rgu008819  
OsCAD9\_LOC\_Os03g12270.1  
Gan006403  
Ola001888.1  
PH02Gene26598.t1  
Bam045387.3  
OsCAD8B\_LOC\_Os09g23540.1  
OsCAD8C1\_LOC\_Os09g23550.1  
OsCAD8C2\_LOC\_Os09g23550.2  
Ola032369.1  
Rgu014373  
Gan002573  
Gan004029  
PH02Gene13789.t1  
Bam027739.1  
OsCAD8A\_LOC\_Os09g23530.1  
OsCAD8D\_LOC\_Os09g23560.1  
Bam027740.1  
Bam040591.1  
PH02Gene13790.t1  
PH02Gene13791.t1  
OsCAD3\_LOC\_Os10g29470.1  
OsCAD5\_LOC\_Os08g16910.1  
Rgu015472  
Ola032840.1  
PH02Gene38471.t1  
Bam005700.1  
Bam017920.1  
PH02Gene38470.t1  
Bam032152.1  
Gan021750  
Gan024020  
OsCAD7\_Os04t0612700-01  
Ola022375.1  
Bam022082.1  
PH02Gene32740.t1  
Bam044253.1  
Rgu006342  
Rgu008067  
Rgu021228  
Rgu020259  
Rgu021242

XXXX

GTAKADLA-RKLGAAHHVDV-ETTDAAAWLAERGGASVILATATSGEAISGLVGGLSGRG 254  
SESKRDEAISLLGADNFVIS---SDKQQMESLKSSLHYIVDTAAGDHPFDPYLSLLKVG 284  
SESKREEAINLLGADNFVIS---SDENQMESLKSSLHFIIDTASGDHQFDPYLSLLKVG 258  
SESKRNEAINLLGADSFVIS---SDKEQMESLKSSLHFIIDTAAAGDHPFDPYLSLLKVG 276  
SESKRKEAIDLLGADNFVVIS---SDENQMETLKSSLNFIIDTASGDHPFDPYLTLLKVG 269  
SESKRKEAIDLLGADNFVVIS---SDENQMETLKSSLNFIIDTASGDHPFDPYLTLLKVG 212  
SESKRAEAIISLLGAENFVIS---SDEKQMESLKSSLHFIIVDTASGDHPMDPYLSLLKVG 269  
SESKRAEAIISLLGADNFVIS---SDEKQMESLQSSLHFIIVDTASGNHPMDPYLSLLKVG 269  
SESKREEAISLLGADNFVIS---SDKKQMESLKSSLHFIIVDTASGDHPFDPYLSLLKVG 359  
SESKREEAISLLGADNFVIS---SDEKQMESLKSSLDFIVDTASGDHPFDPYLSLLKVG 269  
SESKREEAISLLGADNFVIS---SDEKQMESLKSSLDFIVDTASGDHPFDPYLSLLKVG 269  
SESKREEAISLLGADNFVIS---SDEKQMESLKSSLDFIVDTASGDHPFDPYLSLLKVG 269  
SGKKRAEAMEHLGADAYLVS---SDADAMAAAADSLDYIIDTIPVHHHPMEPYLALLKLDG 267  
SGKKRAEAMEHLGADAYLVS---SDADAMAAAADSLDYIIDTIPVHHHPMEPYLALLKLDG 239  
SARKRGEAMDDLGAAYLVS---SDAAMAAAAGDSLXYIIDTIPVHHHPLEPYLALLKLDG 269  
SARKRGEAMDDLGAAYLVS---SDAAMAAAAGDSLXYIIDTIPVHHHPLEPYLALLKLDG 228  
SGKKRAEAMEHLGADAYLVS---SDADQLAAAADSLDYIIDTIPVHHHPLEPYLALLKLDG 260  
SGKKHAEAEIHLGADAYLVS---SDADQMAAAVDSLXYIIDTIPVHHHPLEPYLALLKLDG 269  
SGKKRTEAMEHLGADAYLVS---SDADQMATAADSLDYIIDTIPVHHHPLEPYLALLKMEG 269  
SGKKRAEAMEHLGADAYLVS---SAAEQMAAAAADSLDYIIDTIPVHHHPLEPYLALLKLDG 269  
SGKKRTEAMEHLGADAYLVS---SDADQMAAAAADSLDYIIDTIPVHHHPLEPYLALLKLDG 269  
SPAKEREARENLKADDFVVIS---TDQKQMAMTRSLDYIIDTVAATHSLGPILLELLKVG 273  
SPAKEREARESLKADDFVVIS---TNEKQMAMTRSLDYIIDTWSAKHSLGPILLELLKVG 254  
SPAKEREARESLKADDFVVIS---TDEKQMAMTRSLDYIIDTWSAKHSLGPILLELLKVG 254  
SSAKEREARESLKADDFVVIS---TDEKQMAMTRSLDYIIDTWSAKHSLGPILLELLKVG 270  
SPAKEREARESLKADDFVVIS---TNGKQMAMTRSLDYIIDTWSAKHSLGPILLELLKVG 270  
SPAKEREARESLKADDFVVISRLSTNEKHMAMKRSLEYIIDTWSAKHSLGPILLELLKVG 273  
SPGKEREARERLKADDFVVIS---TNEKQMAMTRSLDYIIDTWSAKHSLGPILLELLKVG 270  
SPAKEREAREGLKADDFVVIS---TNEKQMAMTRSLDYIIDTWSAKHSLGPILLELLKVG 270  
SAGKEAGAMEKLGADDFLLS---TDAEQMKAAIGTMDGIIIDTWSAVHDLTPLVMLLRTHG 275  
SPWKEAEAEVRLGADAFLLS---TNAEQMKAAAGTMDGIIIDTWSAVHDLTPLITLLRTHG 273  
SPRKEVEAEVRLGADDFLLS---TDAEQMKAAIGTMDGIIIDTWSAVHDLTPLIMLLRTHG 199  
SASKEAEAEVRLGADDFLLS---TDAEQMKAAIGTMDGIIIDTWSAVHDLTPLAMLLRTHG 266  
SPGKEAEAEVRLGADDFLLN---TNTERMKAAIGTMDGIIIDTWSAVHDLTPLIMLLRTHG 266  
SPGKEVEAEVRLGADDFVLS---SNAEQMKAAATGTMDGIIIDTWSAVHDLTPLIMLLRTHG 874  
SPGKRREALEHLGADDFVLS---RDAGQMAAAAAGTMDGILNTVSAWHPIAPLFLMKPMA 342  
SPGKRQEAEHLGADDFVLS---RDAGQMAAAAATMDGILNTVSAWHPIAPLFLMKPMA 345  
SPGKRQEAEHLGADDFVLS---RDAGQMAAAAATMDGILNTVSAWHPIAPLFLMKPMA 211  
SPGKKQEAEHLGADDFVLS---RDPEQMKLAVGTMDGIIIDTWSAWHPIAPLFLMKPMA 268  
SPGKKQEAEHLGADDFVLS---RDPEQMKGAVGTMDGIIIDTWSAWHPIAPLFLMKPMA 269  
SPGKRQEAEHLGADDFVLS---RDPEQMKAAGVTMDGIIIDTWSAWHPIAPLFLMKPMA 243  
SPGKRQEAEHLGADDFVLS---RDPEQMKAAGVTMDGIIIDTWSAWHPIAPLFLMKPMA 241  
SPGKRQEAEHLGADDFVLS---RDPEQMKAAGVTMDGIIIDTWSAWHPIAPLFLMKPMA 268  
SPGKRQEAEHLGADDFVLS---RDPEQMKEAVGTMDGIIIDTWSAWHPIAPLFLMKPMA 323  
SPAKREEALERLGAADFLLS---RDGEGMAAAAATMDGIIIDTWSAGHPLVLLSLLKPKG 267  
SPAKRGEALGRLGADAFLLS---RDGEGMAAAAATMDGIIIDTWSAGHPLVLLSLLKPKG 267  
-----AAMSTMDGVIDTWSAGHPIVPLALLKPKM 240  
SPGKRQEAEHLGADAFVLS---QDAEQMKAAAGTMDGIIIDTWSAGHPIVPLALLKPKM 266  
SPGKRQEAEHLGADTFVLS---HDAEQMKAAATGTMDGIIIDTWSAGHPIVPLALLKPKM 381  
SPGKRQEAEHLGADTFVLS---HDAEQMKAAATGTMDGIIIDTWSAGHPIVPLALLKPKM 267  
SPGKKREALERLGAADFVVIS---SSAEEMEAARSTMDGVINTVSANTPMAPYLALLKPKM 275  
SPGKRQEALERLGAADFVVIS---KNADEMNAATGTMDGIIINTVSANIPAPLGLLKPNG 265  
SPGKKQEALERLGAADFVVIS---SNPDEMKGATGTMDGIIINTVSANMPMAPLALLKPKM 288  
SPGKKQEALERLGAADFVVIS---SNADDMKSATGTMDGIIINTVSASIPMAPLGLLKPNG 276  
SPGKKQEALERLGAADFVVIS---SNAEEMKAAMGTIDGIIINTVSANIPVAPLRPAE---- 271  
SPGKKQEALERLGAADFVIS---SNAEEMKAAMGTMDGIIINTVSANIPVAPLFGLLKSNG 276  
SPGKKQEALERLGAADFVIS---SNAEEMKAAMGTMDGIIINTVSANIPVAPLFGLLKSNG 276  
SPGKKQEALERLGAADFVVIS---SNAEEMKAAMGTMDGIIINTVSANIPMAPLFGLLKPNG 273  
SPGKKQEALERLGAADFVVIS---SNAEEMKTAMGTMDGIIINTVSANIPMVPLFGLLKPNG 276  
SPGKKQEALERLGAADFVVIS---SNAEEMKAATGTMDGIIINTVSANIAVAPLFLVLLKPKM 228  
SPGKKQEALERLGAADFVVIS---SNAEEMKAATGTMDGIIINTVSANIAVAPLFLVLLKPKM 239  
SPVKRQEALERLGAADFIVIS---TNAEMKAAMGTMHGIIINTASASTSMHSYLALLKPKG 291  
SPEKRQDALEKLGAADFVLS---SNAEMKSMAGTMHGIIINTACASTSMYPYFALLKPKG 278  
SPEKRQEALEKLGAADFVVIS---SNANEMKAVGMTMHGIIINTACASTSMYAYFGLLKPNG 277  
SPEKRQEALEKLGAADFVVIS---SNANEMKAVGMTMHGIIINTACASTSMYPYFGLLKPNG 275  
SPEKRQEALEKLGAADFVVIS---SNANEMKAVGMTMHGIIINTACASTSMYPYFGLLKPNG 273  
SAAKADDA-RRLGATRVVVIS---TDADQMASVADSLDVVDTVSVEHDLAPLACVDTDG 239  
TDAKAEDG-KAFGAAEYFAT---EDESVFTEQAGSFDILLNTVSGSIDLDAFMGLLRGG 341  
TAAKEEDG-KKFGAAHYAT---EDESVFEDLAGHYDILLNTVGDGIDLDAFLGLTGRGG 273  
SLKKQEDG-KRLGADHYAT---SDPDTFEQLAGSFDLIVNTVSAHIDIAAYLGLLAVDG 263  
TLKSEADG-KRLGADHYAT---SDEATFRELDSSFDLIVNTVSAHIDIAAYLGLLAVDG 270

:: \*

|                           |                                                                |           |     |
|---------------------------|----------------------------------------------------------------|-----------|-----|
| Rgu021554                 | QLLVVGAESPLTLDAMSLIGPVASVAGHA-----                             | SGTSKDSE  | 292 |
| Gan031993                 | VMALVGFPEI-KLHPANLNRGARTLAGSI-----                             | TGGTKGIQ  | 321 |
| OsCAD4 LOC_Os11g40690.1   | VMVLLSFPEI-KVHPENLNLAARSLAGSV-----                             | TGGTKDIQ  | 295 |
| Bam015552.1               | VMALVGFPEI-KVHPANLVLAQTLGSL-----                               | TGGTKDTQ  | 313 |
| OsCAD1.1 LOC_Os10g11810.1 | VMALLSFPEI-KVHPANLNLGGRSLGSGV-----                             | TGGTKDIQ  | 306 |
| OsCAD1.3 LOC_Os10g11810.3 | VMALLSFPEI-KVHPANLNLGGRSLGSGV-----                             | TGGTKDIQ  | 249 |
| Ola036924.1               | VMVLLSFPEI-KVHPANLNLGGRSLGSGV-----                             | TGGTKDTQ  | 306 |
| Rgu012272                 | VMTLLSFPEI-KVHPGNLNLGGRSLGSGV-----                             | TGGTKDTQ  | 306 |
| Bam025746.1               | VMALVGFPEI-KVHPANLNLGGRSLGSGV-----                             | TGGTKDTQ  | 396 |
| PH02Gene48685.t1          | VMTLLSFPEI-KVHPANLNLGGRSLGSGV-----                             | TGGTKDTQ  | 306 |
| PH02Gene44682.t1          | VMVLLSFPEI-KVDPNRLNLGGRSLGSGV-----                             | TGGTKDTQ  | 306 |
| PH02Gene46268.t1          | VMALLSFPEI-KVHPANLNLGARTLGSV-----                              | TGGTKDTQ  | 306 |
| Ola035994.1               | KHILLGVIGQPLSFVSPMVLGRKSITGSF-----                             | IGSVDETA  | 305 |
| Rgu003339                 | KHVLGVIGQPLSFVSPMVLGRKSITGSF-----                              | IGSVDETA  | 277 |
| OsCAD2-1_Os02t0187800-01  | KLILMGVINQPLSFISPMVLGRKAITGSF-----                             | IGSMAETE  | 307 |
| OsCAD2-2_Os02t0187800-02  | KLILMGVINQPLSFISPMVLGRKAITGSF-----                             | IGSMAETE  | 266 |
| Gan017720                 | KHILMGVIGQPLSFVTPMVLGRKSITGSF-----                             | IGSMDETA  | 298 |
| Bam010499.1               | KLILMGVIGQPLSFVTPMVLGRKSITGSF-----                             | IGSIDETE  | 307 |
| PH02Gene39617.t1          | KLILMGVIGQPLSFVTPMVLGRKSITGSF-----                             | IGSMDETE  | 307 |
| PH02Gene04778.t1          | KHILMGVIGQPLSFVTPMVLGRKSITGSF-----                             | IGSMDETE  | 307 |
| Bam007854.1               | KHILMGVIGQPLSFVTPMVLGRKSITGSF-----                             | IGSMDETE  | 307 |
| OsCAD6 LOC_Os04g15920.1   | KLVLVGAPEKPELPSFPLIFGKRTVSGSM-----                             | TGGMKETQ  | 311 |
| Ola016985.1               | KLVLVGAPDKPELPSFPLIFGKRTVSGSM-----                             | TGGMRETQ  | 292 |
| Bam039144.1               | KLVLVGAPEKPELPSFPLIFGKRTVSGSM-----                             | TGGMKETQ  | 292 |
| Bam034885.1               | KLVLVGAPDKPELPSFPLIFGKRTVSGSM-----                             | TGGMKETQ  | 308 |
| Bam039795.1               | KLVLVAAPDKPELPSFPLIFGKRTVSGSM-----                             | TGGMETE   | 308 |
| PH02Gene48202.t1          | KLVLVAAPDKPELPSFPLIFGKRTVSGSM-----                             | TGGMKETQ  | 311 |
| PH02Gene49901.t1          | KLVLVAAPDKPELPSFPLIFGKRTVSGSM-----                             | TGGMKETQ  | 308 |
| Gan014390                 | KLVLVGAPDKPELPSFPLIFGKRTVSGNM-----                             | TGGMKETQ  | 308 |
| Rgu008819                 | KLVPVGPAGKPVQLALYPLQSGGKSVAGSM-----                            | IGGMKETQ  | 313 |
| OsCAD9 LOC_Os03g12270.1   | QLVPVGPSPGKPVQLALYPLQSDGKSVAGSM-----                           | IGGMRDQ   | 311 |
| Gan006403                 | KLVPVGPSPGKPVQLALYPLQSGGKTAVAGSMIGGMGDTQEMIHLGGKTVAGSMIGGMGDTQ | 259       |     |
| Ola001888.1               | KLVPVGPSPGKPVQLALYPLQSGGKSVAGSM-----                           | IGGMKETQ  | 304 |
| PH02Gene26598.t1          | KLVPVGPSPGKPVQLALYPLQSGGKIVAGSM-----                           | IGGMRDQ   | 304 |
| Bam045387.3               | KLVPVGPSPGKPVQLALYPLQSGGKVVAGSM-----                           | IGGMGDTQ  | 912 |
| OsCAD8B LOC_Os09g23540.1  | QMVVVGAPTRPELPAIYVPGGKITGNC-----                               | VGGIRDQ   | 380 |
| OsCAD8C1 LOC_Os09g23550.1 | QMVVVGAPTRPELPAIYVPGGKITGNC-----                               | VGGIRDQ   | 383 |
| OsCAD8C2 LOC_Os09g23550.2 | QMVVVGAPTRPELPAIYVPGGKITGNC-----                               | VGGIRDQ   | 249 |
| Ola032369.1               | QMVVVGAPTRPELPAIYVPGGKITGNC-----                               | VGGVKHCQ  | 306 |
| Rgu014373                 | QMVVVGAPTRPELPAIYVPGGKITGNC-----                               | VGGVKDCQ  | 307 |
| Gan002573                 | QMVVVGAPTRPELPAIYVPGGKITGNC-----                               | VGGIRDQ   | 281 |
| Gan004029                 | QMVVVGAPTRPELPAIYVPGGKITGNC-----                               | VGGIRDQ   | 279 |
| PH02Gene13789.t1          | QMVVVGAPTRPELPAIYVPGGKITGNC-----                               | VGGIRDQ   | 306 |
| Bam027739.1               | QMVVVGAPTRPELPAIYVPGGKITGNC-----                               | VGGMRDQ   | 361 |
| OsCAD8A LOC_Os09g23530.1  | QMVVVGAPAPLQPLPAIYVPGGKITGNC-----                              | GGSVAEQ   | 305 |
| OsCAD8D LOC_Os09g23560.1  | QMVVVGAPAPLQPLPAIYVPGGKITGNC-----                              | VGSVAEQ   | 305 |
| Bam027740.1               | QMVVVGAPSKPELPAIYVPGGKITGNC-----                               | VGGVADCQ  | 278 |
| Bam040591.1               | QMVVVGAPSKPELPAIYVPGGKITGNC-----                               | VGSVADCQ  | 304 |
| PH02Gene13790.t1          | QMVVVGAPSKPELPAIYVPGGKITGNC-----                               | VGSVADCQ  | 419 |
| PH02Gene13791.t1          | QMVVVGAPSKPELPAIYVPGGKITGNC-----                               | VGSVADCQ  | 305 |
| OsCAD3 LOC_Os10g29470.1   | KMILVGLPENPLEVPAFSLVHGKRTLAGSN-----                            | IGGMADTQ  | 313 |
| OsCAD5 LOC_Os08g16910.1   | KMILVGLPEKPMIIPFALVA-----                                      |           | 286 |
| Rgu015472                 | KMILVGLPDNPLEVPAFCLVAASRTLAGSC-----                            | IGGMRDQ   | 326 |
| Ola032840.1               | KMILVGLPENPLEVPAFSLVHGKRTLAGSC-----                            | IGGMRDQ   | 314 |
| PH02Gene38471.t1          | -----AQWQDDPANKTLAGSC-----                                     | IGGMRDQ   | 295 |
| Bam005700.1               | KMILVGLPEKPLEVPAFALVQMNRTLGCSC-----                            | IGGMRDQ   | 314 |
| Bam017920.1               | KMILVGLPEKPLEVPAFALVQSKFIRVT-----                              |           | 304 |
| PH02Gene38470.t1          | KMILVGLPDKPLEVPAFALVATNKTLAGSC-----                            | IGGMRDQ   | 311 |
| Bam032152.1               | KMILVGLPEKPLEVPAFALVQTNKTLAGSC-----                            | IGGMRDQ   | 314 |
| Gan021750                 | KMILVGLPEKPLEVPAFALVQMNKTLAGSC-----                            | IGGMRDQ   | 266 |
| Gan024020                 | KMILVGLPEKPLEIIPAFALVQMNKTLAGSC-----                           | IGGMRDQ   | 277 |
| OsCAD7_Os04t0612700-01    | KMILVGLPEKPLQIPTFALVGGGKILAGSC-----                            | MGSISSETQ | 329 |
| Ola022375.1               | KIILVGLPEKPLQPLAFALVGGGKILAGSC-----                            | MGSIEETQ  | 316 |
| Bam022082.1               | KMILVGLPEKPLQVPFALVGGGKALAGSC-----                             | MGSIRDQ   | 315 |
| PH02Gene32740.t1          | KMILVGLPEKPLQVPFALVGGGKTLAGSC-----                             | MGSIKDTQ  | 313 |
| Bam044253.1               | KMILVGLPEKPLQVSAFALVGGGKTLAGSC-----                            | MGSIKDTQ  | 311 |
| Rgu006342                 | VLYPVGYL-GPLSVDSMSLLPGRKRLSSSG-----                            | SGGVDRTA  | 276 |
| Rgu008067                 | VMANLGAPSDNLEVSFAFSLPNRRSIAGSM-----                            | VGGLPETQ  | 379 |
| Rgu021228                 | VMVNLGAPSDKLEVGAFSLPFRRSIEGSM-----                             | VGGLPETQ  | 311 |
| Rgu020259                 | ALVNVGAPAEPTTVHAMTLVGGRRTFAGSM-----                            | IGGIAETQ  | 301 |
| Rgu021242                 | AMVNVGIPATPGSIHAFSLANGRRSLSGSK-----                            | IGGIRDQ   | 308 |

|                           |                                                                 |     |
|---------------------------|-----------------------------------------------------------------|-----|
| Rgu021554                 | DTLSFCRLTAVRPMVETMPLERAGEAYERMMANDARFRMVLTTGQ-----              | 337 |
| Gan031993                 | EMLNLCAAKKIYPEIEIIKMDYINEALKRLVNDRVKYRFVIDIENSFNQYN-----        | 372 |
| OsCAD4 LOC_Os11g40690.1   | EMINFCAANNVPDIEMIKIDYNEALQRLINRDVRFVRFVIDIENSFK*-----           | 343 |
| Bam015552.1               | EMLNFCAAANKIYPEIEIIKMDNINEALERLINRDVKYRFVGGVMALVGFPEIKVHPANL    | 373 |
| OsCAD1.1 LOC_Os10g11810.1 | EMINFCAANKIYPDIEMIKIDYINEALQRLVDRDVRFRFVIDIENSFK*-----          | 354 |
| OsCAD1.3 LOC_Os10g11810.3 | EMINFCAANKIYPDIEMIKIDYINEALQRLVDRDVRFRFVIDIENSFK*-----          | 297 |
| Ola036924.1               | EMINFCAANKIYPEIEIVKMDYINEALERLIKRDVRYRFVIDIENSFK-----           | 354 |
| Rgu012272                 | EMINFCAANKIYPDIEMINIDYINEALDRLIKDVRYRFVIDIMENSFK-----           | 354 |
| Bam025746.1               | EMINFCAANKIYPDIEMIKIDYINEALERLINRDVRYRFVIDIETSFK-----           | 444 |
| PH02Gene48685.t1          | EMINFCAANKIYPDIEMIKIDYINEALERLINRDVRYRFVIDIENSFK-----           | 354 |
| PH02Gene44682.t1          | EMINFCAANKIYPDIEIIKIDYINEALERLINRDARYRFVIDIENSFK-----           | 354 |
| PH02Gene46268.t1          | QMLNFCAAANKIYPDIEMIKIDYINEALERLINRDVRYRFVIDIENSFK-----          | 354 |
| Ola035994.1               | EVLQFCVDKGLTSEIEVVVKMGYNQALERLERNDVRYRFVVDVAGSNLEDDAATDLA----   | 362 |
| Rgu003339                 | EVLQFCVDKGLTSQIEVVVKMDYVNQALKRLERNDVRYRFVVDVAGSNLEASAADLP----   | 333 |
| OsCAD2-1_Os02t0187800-01  | EVLNFCVDKGLTSQIEVVVKMDYVNQALERLERNDVRYRFVVDVAGSNIDDDADAPPA*---- | 363 |
| OsCAD2-2_Os02t0187800-02  | EVLNFCVDKGLTSQIEVVVKMDYVNQALERLERNDVRYRFVVDVAGSNIDDDADAPPA*---- | 322 |
| Gan017720                 | EVLQFCVDKGLTSQIEVVVKMDYVNQALERLERNDVRYRFVVDVAGSNIEDAA-----      | 350 |
| Bam010499.1               | EVLQFCVDKGLTSQIEVVVKMDYVNQALERLERNDVRYRFVVDVAGSNIVDAA-----      | 359 |
| PH02Gene39617.t1          | EVLQFCVDKGLTSQIEVVVKMDYVNQALERLERNDVRYRFVVDVAGSNIEDAA-----      | 359 |
| PH02Gene04778.t1          | EVLQFCVDKGLTSQIEVVVKMDYVNQAFERLERNDVRYRFVVDVAGSNIEDAA-----      | 359 |
| Bam007854.1               | EVLQFCVDKGLTSQIEVVVKMDYVNQALERLERNDVRYRFVLDVAGSNIEDAA-----      | 359 |
| OsCAD6 LOC_Os04g15920.1   | EMMDICGEHNITCDIEIVSTDRINDALARLARNDVRYRFVINVGGS SKL*-----        | 360 |
| Ola016985.1               | EMMDLCGQHNTAQVEVIGIEDVNAAMERLQKGDVRYRFVVDIESS SKL-----          | 341 |
| Bam039144.1               | EMMDLCGEHDITCDIELVSTDRINEALGRLARNDVRYRFVIDIGKNSKL-----          | 341 |
| Bam034885.1               | EMMDLCGEHDITCDIELVSTDRINEALGRLARNDVRYRFVIDIGKNSKL-----          | 357 |
| Bam039795.1               | EMMDMCGEHNITCDIELVSTDRINEALGRLARNDVRYRFVIDIGKNPKL-----          | 357 |
| PH02Gene48202.t1          | EMMDLCGEHNITCDIELVSTDRINEALGRLARNDVRYRFVVDIGKNSKLQ-----         | 361 |
| PH02Gene49901.t1          | EMMDLCGEHNITCDIELVSTDRINEALGRLARNDVRYRFVVDIGKNSKL-----          | 357 |
| Gan014390                 | EMMDLCGEHNITCDIELVSTDRINEALGRLARNDVRYRFVVDIAKNSKL-----          | 357 |
| Rgu008819                 | EMIDFAAEHNITAQVEVIGIEDVNAAMERLQKGDVRYRFVIDIANTIARA-----         | 363 |
| OsCAD9 LOC_Os03g12270.1   | EMVDFAVEHGVAAAEVEVIGMEDVNGAMERLQKGDVRYRFVIDVANTMARAR*-----      | 362 |
| Gan006403                 | EMIDFAAEHNITAAAEVEVIGIEDVNAAMERLQKGDVRYRFVIDVANTMARAY-----      | 310 |
| Ola001888.1               | EMIDFAAEHNITAQVEVIGMEDVNAAMERLQKGDVRYSSTAIKGEKKGWR-----         | 354 |
| PH02Gene26598.t1          | EMIDFAAEHSAAEAEVEVIGIDVNAAMERLQKGDVRYRFVIDIANTMARA-----         | 354 |
| Bam045387.3               | EMIDFAAEHNITAAAEVEVIGIDVNAAMERLQKGDVRYRFVIDVANTMARAY-----       | 963 |
| OsCAD8B LOC_Os09g23540.1  | AMLDFAGEHGITAEEVEVIMKDYVNTAMERLEKNDVRYRFVIDVAGSSLGGSGDDKI*----  | 436 |
| OsCAD8C1 LOC_Os09g23550.1 | AMLDFAGEHGITAEEVEVIMKDYVNTAMERLEKNDVRYRFVIDVAGSSLAGSGDAKI*----  | 439 |
| OsCAD8C2 LOC_Os09g23550.2 | AMLDFAGEHGITAEEVEVIMKDYVNTAMERLEKNDVRYRFVIDVAGSSLAGSGDAKI*----  | 305 |
| Ola032369.1               | AMLDFAAAHGITAEEVEVVKMDYVNTALERLEKNDVRYRFVIDVAGSLGSTA-----       | 357 |
| Rgu014373                 | AMLDFAAEHGITAEEVEVIMKDYVNTALERLEKNDVRYRFVVDVAGSLGSDA-----       | 358 |
| Gan002573                 | AMLDFAGEHGVTADVEVIMKDYANKALERLEKNDVRFVVIDVAGSLGSTS-----         | 332 |
| Gan004029                 | AMLDFAGEHGITAEEVEVIMKDYVNTALERLEKNDVRYRFVIDIAGSLGSAA-----       | 330 |
| PH02Gene13789.t1          | AMLNFAGEHGITAEEVEVIMKDYVNTALERLEKNDVRYRFVIDVAGSLGSTA-----       | 357 |
| Bam027739.1               | AMLDFAGEHGITAEEVEVIMKDYVNTALERLEKNDVRYRFVIDVAGSLGSTA-----       | 412 |
| OsCAD8A LOC_Os09g23530.1  | AMLDFAGEHGIAADVEVVAMGDVNAALGRLERNDVRYRFVIDVAGTLHAAAAAPS*-----   | 359 |
| OsCAD8D LOC_Os09g23560.1  | AMLDFAGEHGIAADVEVVAMDVNAALGRLERNDVRYRFVVDVAGTMHAAAAAASS*-----   | 362 |
| Bam027740.1               | AMLDFAGEHGVTADVEVIMKDYVNTAVERLERNDVRYRFVVDVAGSLGAAA-----        | 329 |
| Bam040591.1               | AMLDFAGQHGITADVEIVKMDYVNTAVERLERNDVRYRFVVDVAGSLGAAA-----        | 355 |
| PH02Gene13790.t1          | AMLDFAGENGITADVEVVVKMDYVNTAVERLERNDVRYRFVLDVAGSLGAAA-----       | 470 |
| PH02Gene13791.t1          | AMLDFAGKHGITADVEVVVKMDYVNTAVERLERNDVRYRFVLDVAGSLGAAA-----       | 356 |
| OsCAD3 LOC_Os10g29470.1   | EMIELAAKHGVTADIEVIGADDVNTAMERLAKADVRYRFVIDVGNTLHAAAAE*-----     | 366 |
| OsCAD5 LOC_Os08g16910.1   | -----SKHGVTAEIEVIGADYVNTAMERLAKADVRYRFVIDIGNTLKDAIE*-----       | 332 |
| Rgu015472                 | EMMDLAAEHGVTADVEVISADYVNAAMERLAEADVRYRFVIDVGNTLKSTV-----        | 377 |
| Ola032840.1               | EMIDLAAKHGVTADVEVISADYVNTAMERLAKADVRYRFVIDVGNTLTNTE-----        | 365 |
| PH02Gene38471.t1          | EMIDLAAKHGVTADIEVISANYVNTAMERLAKADVRLRLIL-----                  | 336 |
| Bam005700.1               | EMIDLAAKHGVTADIEVIGADYVNTAMERLARADVSTGDDDVVIKILYCGICHSDLHSI     | 374 |
| Bam017920.1               | -----                                                           | 304 |
| PH02Gene38470.t1          | EMIDLAAKHGVTADIEVISANYVNTAMERLAKADVRYRFVIDIGNTLENTE-----        | 362 |
| Bam032152.1               | EMIDLAAKHGVTADIEVIGAEYVNTALERLAKADVRYRFVIDIGNTLKNTA-----        | 365 |
| Gan021750                 | EMINLAAKHGVTADVEVIGADYVNTAMERLAKADVRYRFVIDIGNTLKDTE-----        | 317 |
| Gan024020                 | EMIDLAAKHGVTADVEVIGADYVNTAMERLAKADVRYRFVIDIGNTLKDTE-----        | 328 |
| OsCAD7_Os04t0612700-01    | EMIDFAAEHGVAAADIELIGADEVNTAMERLAKGDVRYRFVVDIGNTLRSD*-----       | 379 |
| Ola022375.1               | EMIDFAAEHGVAAADIELVGAGGVNAAMERLAKGDVRYRFVIDVGDTLKSSD-----       | 367 |
| Bam022082.1               | EMIDFAAKHGVTADIELIGADGVNTAMERLAKGDIRYRFVIDVGNTLKSD-----         | 365 |
| PH02Gene32740.t1          | EMIDFAAKHGVTADIELVGADGVNTAMERLAKGDVRYRFVIDVGNTLKSD-----         | 363 |
| Bam044253.1               | EMIDFAAKHGVTADIELIGADSNTAMERLAKGDIRYRFVIDVGNTLKSD-----          | 361 |
| Rgu006342                 | ELLAFCGEHGITADVEVLPASEVATALDRLARNDVRYRFVLDTTAL-----             | 322 |
| Rgu008067                 | EMMDFCAEHGVTADVEVITADQVDEYYDKVVSGDVRYRAVIDTSSLA-----            | 426 |
| Rgu021228                 | EMLDFCAEHGVTATVEVIDADDVDAYYDKVVSGDVRYRAVIDTATFG-----            | 358 |
| Rgu020259                 | EMLDFCAEHGIGSDVEVIGAEQVNEAYERVLASDVRYRFVIDTASLA-----            | 348 |
| Rgu021242                 | KMLDFCAEHHIGAEIETIGVDDVNKAYDRVVDSDVRYRFVIDTATFGG-----           | 356 |
