# Supplementary material for: Homo- and Hetero-Dimers of CAD Enzymes Regulate Lignification and Abiotic Stress Response in Moso Bamboo
Source: Int J Mol Sci. 2021 Nov 29;22(23):12917. doi: 10.3390/ijms222312917 (PMC8657895; doi:10.3390/ijms222312917)
Supplement: Supplementary file 1 [file ijms-22-12917-s001.zip]

Archive with 10 entries (10 files):
- Supplementary files/Figure S1.png
- Supplementary files/Figure S2.tif
- Supplementary files/File S1.pdf
- Supplementary files/File S2.pdf
- Supplementary files/Table S1.xlsx
- Supplementary files/Table S2.xlsx
- Supplementary files/Table S3.xlsx
- Supplementary files/Table S4.xlsx
- Supplementary files/Table S5.xlsx
- Supplementary files/Table S6.xlsx
