# Supplementary material for: Homo- and Hetero-Dimers of CAD Enzymes Regulate Lignification and Abiotic Stress Response in Moso Bamboo
Source: Int J Mol Sci. 2021 Nov 29;22(23):12917. doi: 10.3390/ijms222312917 (PMC8657895; doi:10.3390/ijms222312917)
Supplement: Supplementary file 1 [file ijms-22-12917-s001.zip › Supplementary files/Table S1.xlsx]

## Sheet: Sheet1
Table S1. CAD gene names and gene IDs used in this study
S.NO	Gene Name	Gene ID
1	AtCAD1	At1g72680
2	AtCAD2	At2g21730
3	AtCAD3	At2g21890
4	AtCAD4	At3g19450
5	AtCAD5	At4g34230
6	AtCAD6	At4g37970
7	AtCAD7	At4g37980
8	AtCAD8	At4g37990
9	AtCAD9	At4g39330
1	BamCAD1	Bam015552.1
2	BamCAD2	Bam010499.1
3	BamCAD3	Bam005700.1
4	BamCAD4	Bam025746.1
5	BamCAD5	Bam017920.1
6	BamCAD6	Bam039144.1
7	BamCAD7	Bam032152.1
8	BamCAD8	Bam045387.3
9	BamCAD9	Bam027740.1
10	BamCAD10	Bam040591.1
11	BamCAD11	Bam027739.1
12	BamCAD12	Bam022082.1
13	BamCAD13	Bam044253.1
14	BamCAD14	Bam034885.1
15	BamCAD15	Bam039795.1
16	BamCAD16	Bam007854.1
1	GanCAD1	Gan031993
2	GanCAD2	Gan017720
3	GanCAD3	Gan021750
4	GanCAD4	Gan006403
5	GanCAD5	Gan024020
6	GanCAD6	Gan014390
7	GanCAD7	Gan004029
8	GanCAD8	Gan002573
1	OlaCAD1	Ola036924.1
2	OlaCAD2	Ola035994.1
3	OlaCAD3	Ola032840.1
4	OlaCAD4	Ola001888.1
5	OlaCAD5	Ola022375.1
6	OlaCAD6	Ola016985.1
7	OlaCAD7	Ola032369.1
1	OsCAD1.1	Os10g11810.1
2	OsCAD1.3	Os10g11810.3
3	OsCAD2-1	Os02t0187800-01
4	OsCAD2-2	Os02t0187800-02
5	OsCAD3	Os10g29470.1
6	OsCAD4	Os11g40690.1
7	OsCAD5	Os08g16910.1
8	OsCAD6	Os04g15920.1
9	OsCAD7	Os04t0612700-01
10	OsCAD8A	Os09g23530.1
11	OsCAD8B	Os09g23540.1
12	OsCAD8C1	Os09g23550.1
13	OsCAD8C2	Os09g23550.2
14	OsCAD8D	Os09g23560.1
15	OsCAD9	Os03g12270.1
1	PheCAD1	PH02Gene46268.t1
2	PheCAD2	PH02Gene39617.t1
3	PheCAD3	PH02Gene38470.t1
4	PheCAD4	PH02Gene44682.t1
5	PheCAD5	PH02Gene38471.t1
6	PheCAD6	PH02Gene48202.t1
7	PheCAD7	PH02Gene32740.t1
8	PheCAD8	PH02Gene13789.t1
9	PheCAD9	PH02Gene26598.t1
10	PheCAD10	PH02Gene13790.t1
11	PheCAD11	PH02Gene13791.t1
12	PheCAD12	PH02Gene49901.t1
13	PheCAD13	PH02Gene48685.t1
14	PheCAD14	PH02Gene04778.t1
1	PtrCAD1	Potri.001G307200.1|PACid:27048432
2	PtrCAD2	Potri.016G023300.1|PACid:27012494
3	PtrCAD6	Potri.001G268600.1|PACid:27040164
4	PtrCAD7	Potri.002G018300.6|PACid:27023834
5	PtrCAD8	Potri.009G063400.1|PACid:26987797
6	PtrCAD9	Potri.009G063300.1|PACid:26988078
7	PtrCAD10	Potri.016G078300.1|PACid:27012190
1	RguCAD1	Rgu012272
2	RguCAD2	Rgu003339
3	RguCAD3	Rgu015472
4	RguCAD4	Rgu008819
5	RguCAD5	Rgu014373
6	RguCAD6	Rgu006342
7	RguCAD7	Rgu008067
8	RguCAD8	Rgu020259
9	RguCAD9	Rgu021228
10	RguCAD10	Rgu021242
11	RguCAD11	Rgu021554
