# Supplementary material for: Homo- and Hetero-Dimers of CAD Enzymes Regulate Lignification and Abiotic Stress Response in Moso Bamboo
Source: Int J Mol Sci. 2021 Nov 29;22(23):12917. doi: 10.3390/ijms222312917 (PMC8657895; doi:10.3390/ijms222312917)
Supplement: Supplementary file 1 [file ijms-22-12917-s001.zip › Supplementary files/Table S2.xlsx]

## Sheet: Sheet1
Table S2: Details of Cis-acting elements of Bambusoideae CAD genes
Gene name	start	end	Cis-element
BamCAD10	420	425	ABRE
BamCAD10	813	818	ABRE
BamCAD10	866	871	ABRE
BamCAD10	1648	1653	ABRE
BamCAD10	813	819	ABRE
BamCAD11	734	740	ABRE
BamCAD11	732	741	ABRE
BamCAD11	1034	1039	ABRE
BamCAD11	735	740	ABRE
BamCAD11	1033	1039	ABRE
BamCAD12	318	325	ABRE
BamCAD12	1168	1173	ABRE
BamCAD12	1168	1174	ABRE
BamCAD14	403	408	ABRE
BamCAD14	948	953	ABRE
BamCAD14	1920	1925	ABRE
BamCAD14	402	408	ABRE
BamCAD2	740	745	ABRE
BamCAD2	1014	1019	ABRE
BamCAD2	1158	1163	ABRE
BamCAD2	1216	1221	ABRE
BamCAD2	1476	1481	ABRE
BamCAD2	740	746	ABRE
BamCAD3	1003	1008	ABRE
BamCAD3	1003	997	ABRE
BamCAD3	1003	997	ABRE
BamCAD4	768	774	ABRE
BamCAD4	1012	1017	ABRE
BamCAD4	1310	1315	ABRE
BamCAD5	175	166	ABRE
BamCAD6	365	371	ABRE
BamCAD6	366	371	ABRE
BamCAD7	1935	1940	ABRE
BamCAD7	1826	1832	ABRE
BamCAD8	479	484	ABRE
BamCAD8	1057	1062	ABRE
BamCAD8	6	12	ABRE
BamCAD9	141	146	ABRE
BamCAD9	332	337	ABRE
BamCAD9	613	618	ABRE
BamCAD9	710	715	ABRE
BamCAD9	1123	1132	ABRE
BamCAD9	1126	1131	ABRE
BamCAD9	1141	1147	ABRE
BamCAD9	1142	1147	ABRE
GanCAD2	77	68	ABRE
GanCAD2	1472	1467	ABRE
GanCAD2	1783	1774	ABRE
GanCAD3	333	328	ABRE
GanCAD3	718	712	ABRE
GanCAD3	719	714	ABRE
GanCAD5	1304	1299	ABRE
GanCAD5	1686	1681	ABRE
GanCAD5	428	418	ABRE
OlaCAD2	671	680	ABRE
OlaCAD2	856	865	ABRE
OlaCAD2	859	864	ABRE
OlaCAD2	1700	1706	ABRE
OlaCAD2	1701	1706	ABRE
OlaCAD3	1510	1515	ABRE
OlaCAD3	1879	1888	ABRE
OlaCAD3	427	436	ABRE
OlaCAD3	713	718	ABRE
OlaCAD3	913	922	ABRE
OlaCAD3	915	921	ABRE
OlaCAD3	916	921	ABRE
OlaCAD3	713	719	ABRE
OlaCAD4	138	133	ABRE
OlaCAD6	815	824	ABRE
OlaCAD7	384	389	ABRE
PheCAD10	153	147	ABRE
PheCAD10	428	419	ABRE
PheCAD10	154	149	ABRE
PheCAD11	580	575	ABRE
PheCAD11	1577	1572	ABRE
PheCAD12	183	178	ABRE
PheCAD12	679	674	ABRE
PheCAD13	1272	1266	ABRE
PheCAD13	1273	1268	ABRE
PheCAD2	1946	1941	ABRE
PheCAD2	1488	1478	ABRE
PheCAD2	1489	1479	ABRE
PheCAD2	1491	1485	ABRE
PheCAD2	1492	1487	ABRE
PheCAD3	1535	1530	ABRE
PheCAD3	1693	1688	ABRE
PheCAD3	1700	1691	ABRE
PheCAD3	1864	1855	ABRE
PheCAD3	1534	1528	ABRE
PheCAD3	1693	1687	ABRE
PheCAD3	1951	1945	ABRE
PheCAD3	1534	1528	ABRE
PheCAD3	1693	1687	ABRE
PheCAD3	1951	1945	ABRE
PheCAD4	14	9	ABRE
PheCAD4	280	271	ABRE
PheCAD4	610	605	ABRE
PheCAD5	96	89	ABRE
PheCAD5	318	313	ABRE
PheCAD5	334	329	ABRE
PheCAD5	618	613	ABRE
PheCAD5	628	622	ABRE
PheCAD5	629	624	ABRE
PheCAD5	958	949	ABRE
PheCAD5	960	955	ABRE
PheCAD5	1825	1820	ABRE
PheCAD5	1851	1842	ABRE
PheCAD5	317	311	ABRE
PheCAD5	334	328	ABRE
PheCAD5	960	954	ABRE
PheCAD5	1825	1819	ABRE
PheCAD7	258	249	ABRE
PheCAD7	724	719	ABRE
PheCAD7	1507	1501	ABRE
PheCAD8	915	906	ABRE
PheCAD8	317	311	ABRE
PheCAD9	1850	1844	ABRE
RguCAD1	566	557	ABRE
RguCAD10	1084	1079	ABRE
RguCAD11	277	272	ABRE
RguCAD11	694	689	ABRE
RguCAD11	726	721	ABRE
RguCAD11	848	843	ABRE
RguCAD11	850	841	ABRE
RguCAD11	1108	1098	ABRE
RguCAD11	1268	1259	ABRE
RguCAD11	1271	1266	ABRE
RguCAD11	1767	1762	ABRE
BamCAD1	1847	1852	CGTCA-motif
BamCAD11	401	406	CGTCA-motif
BamCAD11	549	554	CGTCA-motif
BamCAD13	122	127	CGTCA-motif
BamCAD13	1833	1838	CGTCA-motif
BamCAD14	509	514	CGTCA-motif
BamCAD14	961	966	CGTCA-motif
BamCAD14	1652	1657	CGTCA-motif
BamCAD14	1922	1927	CGTCA-motif
BamCAD15	5	10	CGTCA-motif
BamCAD15	1644	1649	CGTCA-motif
BamCAD16	499	504	CGTCA-motif
BamCAD16	616	621	CGTCA-motif
BamCAD2	178	183	CGTCA-motif
BamCAD2	1213	1218	CGTCA-motif
BamCAD2	1452	1457	CGTCA-motif
BamCAD4	629	634	CGTCA-motif
BamCAD4	1010	1015	CGTCA-motif
BamCAD4	1824	1829	CGTCA-motif
BamCAD5	1811	1806	CGTCA-motif
BamCAD5	1814	1819	CGTCA-motif
BamCAD6	159	164	CGTCA-motif
BamCAD7	1799	1804	CGTCA-motif
BamCAD7	1796	1801	CGTCA-motif
BamCAD7	1377	1382	CGTCA-motif
BamCAD7	1640	1645	CGTCA-motif
BamCAD7	1664	1669	CGTCA-motif
BamCAD7	1573	1578	CGTCA-motif
BamCAD9	139	144	CGTCA-motif
BamCAD9	475	480	CGTCA-motif
BamCAD9	1501	1506	CGTCA-motif
GanCAD3	318	313	CGTCA-motif
GanCAD5	807	802	CGTCA-motif
OlaCAD1	1213	1218	CGTCA-motif
OlaCAD2	497	502	CGTCA-motif
OlaCAD5	1588	1593	CGTCA-motif
OlaCAD5	1591	1596	CGTCA-motif
OlaCAD7	996	1001	CGTCA-motif
OlaCAD7	1551	1556	CGTCA-motif
PheCAD1	6	1	CGTCA-motif
PheCAD1	276	271	CGTCA-motif
PheCAD1	641	636	CGTCA-motif
PheCAD1	721	716	CGTCA-motif
PheCAD1	848	843	CGTCA-motif
PheCAD10	72	67	CGTCA-motif
PheCAD10	438	433	CGTCA-motif
PheCAD10	464	459	CGTCA-motif
PheCAD10	910	905	CGTCA-motif
PheCAD11	1416	1411	CGTCA-motif
PheCAD11	1869	1864	CGTCA-motif
PheCAD3	369	364	CGTCA-motif
PheCAD3	579	574	CGTCA-motif
PheCAD3	1715	1710	CGTCA-motif
PheCAD3	1812	1807	CGTCA-motif
PheCAD4	375	370	CGTCA-motif
PheCAD4	392	387	CGTCA-motif
PheCAD4	242	237	CGTCA-motif
PheCAD7	1126	1121	CGTCA-motif
PheCAD7	1777	1772	CGTCA-motif
PheCAD8	583	578	CGTCA-motif
PheCAD8	648	643	CGTCA-motif
PheCAD8	1353	1348	CGTCA-motif
PheCAD8	1732	1727	CGTCA-motif
PheCAD8	1864	1859	CGTCA-motif
PheCAD9	379	374	CGTCA-motif
PheCAD9	1034	1029	CGTCA-motif
PheCAD9	1075	1070	CGTCA-motif
RguCAD10	14	9	CGTCA-motif
RguCAD10	103	98	CGTCA-motif
RguCAD10	1585	1580	CGTCA-motif
RguCAD10	1952	1947	CGTCA-motif
RguCAD10	581	576	CGTCA-motif
RguCAD11	1362	1357	CGTCA-motif
RguCAD11	1116	1111	CGTCA-motif
BamCAD5	793	786	GARE-motif
GanCAD6	1495	1488	GARE-motif
PheCAD1	534	527	GARE-motif
PheCAD1	1816	1809	GARE-motif
PheCAD13	269	262	GARE-motif
PheCAD9	830	823	GARE-motif
BamCAD10	85	91	LTR
BamCAD10	1757	1763	LTR
BamCAD12	1306	1312	LTR
BamCAD15	1508	1514	LTR
BamCAD5	453	447	LTR
BamCAD6	1542	1548	LTR
BamCAD7	1586	1592	LTR
GanCAD3	171	165	LTR
GanCAD3	1098	1092	LTR
GanCAD3	1979	1973	LTR
OlaCAD2	24	30	LTR
OlaCAD2	1321	1327	LTR
OlaCAD3	1094	1100	LTR
OlaCAD5	1514	1520	LTR
PheCAD11	883	877	LTR
PheCAD12	877	871	LTR
PheCAD2	322	316	LTR
PheCAD2	512	506	LTR
PheCAD5	255	249	LTR
PheCAD5	1231	1225	LTR
PheCAD7	154	148	LTR
BamCAD1	262	268	MBS
BamCAD12	1267	1273	MBS
BamCAD12	1712	1718	MBS
BamCAD13	1928	1934	MBS
BamCAD8	301	307	MBS
GanCAD2	908	902	MBS
OlaCAD4	522	516	MBS
OlaCAD4	309	303	MBS
PheCAD11	1213	1207	MBS
PheCAD11	1845	1839	MBS
PheCAD13	54	48	MBS
PheCAD14	1845	1839	MBS
PheCAD3	1683	1677	MBS
PheCAD3	38	32	MBS
PheCAD8	1962	1956	MBS
RguCAD5	1	-5	MBS
BamCAD5	765	772	MRE
BamCAD1	1862	1868	MYB
BamCAD1	1038	1044	MYB
BamCAD10	199	205	MYB
BamCAD10	440	446	MYB
BamCAD10	1081	1087	MYB
BamCAD11	1049	1055	MYB
BamCAD11	1353	1359	MYB
BamCAD11	1463	1469	MYB
BamCAD11	1827	1833	MYB
BamCAD12	1016	1022	MYB
BamCAD12	1562	1568	MYB
BamCAD12	1712	1718	MYB
BamCAD12	719	725	MYB
BamCAD14	273	279	MYB
BamCAD14	736	742	MYB
BamCAD14	1002	1008	MYB
BamCAD14	1006	1012	MYB
BamCAD15	992	998	MYB
BamCAD15	1676	1682	MYB
BamCAD16	152	158	MYB
BamCAD16	362	368	MYB
BamCAD16	971	977	MYB
BamCAD2	714	720	MYB
BamCAD2	1606	1612	MYB
BamCAD3	599	593	MYB
BamCAD5	527	521	MYB
BamCAD5	793	799	MYB
BamCAD6	153	159	MYB
BamCAD6	313	319	MYB
BamCAD6	673	679	MYB
BamCAD6	1659	1665	MYB
BamCAD6	670	676	MYB
BamCAD7	1371	1377	MYB
BamCAD8	468	474	MYB
BamCAD8	301	307	MYB
BamCAD9	1059	1065	MYB
BamCAD9	1351	1357	MYB
BamCAD9	1658	1664	MYB
BamCAD9	1	7	MYB
BamCAD9	732	738	MYB
BamCAD9	955	961	MYB
GanCAD2	387	381	MYB
GanCAD2	1317	1311	MYB
GanCAD5	108	102	MYB
GanCAD5	289	283	MYB
GanCAD6	1926	1920	MYB
GanCAD6	576	570	MYB
GanCAD6	592	586	MYB
GanCAD6	924	918	MYB
GanCAD6	990	984	MYB
OlaCAD1	729	735	MYB
OlaCAD3	1768	1774	MYB
OlaCAD3	1224	1230	MYB
OlaCAD4	323	317	MYB
OlaCAD4	1324	1318	MYB
OlaCAD5	76	82	MYB
OlaCAD5	562	568	MYB
OlaCAD6	1489	1495	MYB
OlaCAD6	1493	1499	MYB
OlaCAD7	1304	1310	MYB
OlaCAD7	1540	1546	MYB
OlaCAD7	681	687	MYB
OlaCAD7	1329	1335	MYB
PheCAD1	291	285	MYB
PheCAD1	534	528	MYB
PheCAD1	1041	1035	MYB
PheCAD1	1817	1811	MYB
PheCAD10	273	267	MYB
PheCAD10	1603	1597	MYB
PheCAD11	1845	1839	MYB
PheCAD12	1523	1517	MYB
PheCAD12	75	69	MYB
PheCAD12	940	934	MYB
PheCAD12	1186	1180	MYB
PheCAD12	1878	1872	MYB
PheCAD13	54	48	MYB
PheCAD13	330	324	MYB
PheCAD13	269	263	MYB
PheCAD13	289	283	MYB
PheCAD13	350	344	MYB
PheCAD13	385	379	MYB
PheCAD14	1845	1839	MYB
PheCAD2	702	696	MYB
PheCAD2	1455	1449	MYB
PheCAD4	1817	1811	MYB
PheCAD4	314	308	MYB
PheCAD4	790	784	MYB
PheCAD6	1570	1564	MYB
PheCAD6	1864	1858	MYB
PheCAD6	1278	1272	MYB
PheCAD7	1140	1134	MYB
PheCAD7	26	20	MYB
PheCAD8	1819	1813	MYB
PheCAD8	1962	1956	MYB
PheCAD8	1215	1209	MYB
PheCAD8	1606	1600	MYB
PheCAD9	700	694	MYB
PheCAD9	759	753	MYB
PheCAD9	1706	1700	MYB
PheCAD9	1979	1973	MYB
PheCAD9	830	824	MYB
PheCAD9	1078	1072	MYB
PheCAD9	1287	1281	MYB
PheCAD9	1595	1589	MYB
PheCAD9	1649	1643	MYB
RguCAD1	22	16	MYB
RguCAD1	306	300	MYB
RguCAD5	434	428	MYB
RguCAD5	1909	1903	MYB
BamCAD10	315	322	P-box
GanCAD6	1588	1581	P-box
PheCAD12	1389	1382	P-box
PheCAD2	1476	1469	P-box
PheCAD6	1016	1009	P-box
BamCAD14	487	496	TCA-element
BamCAD14	713	722	TCA-element
BamCAD15	1442	1451	TCA-element
BamCAD2	756	765	TCA-element
BamCAD7	1022	1031	TCA-element
BamCAD9	1308	1317	TCA-element
OlaCAD5	1425	1434	TCA-element
PheCAD11	259	250	TCA-element
PheCAD11	1232	1223	TCA-element
PheCAD14	535	526	TCA-element
PheCAD14	833	824	TCA-element
PheCAD14	532	523	TCA-element
PheCAD2	1841	1832	TCA-element
PheCAD3	12	3	TCA-element
PheCAD4	516	507	TCA-element
PheCAD6	615	606	TCA-element
PheCAD8	805	796	TCA-element
PheCAD9	768	759	TCA-element
RguCAD11	625	615	TCA-element
RguCAD5	245	236	TCA-element
RguCAD5	448	439	TCA-element
BamCAD5	1379	1385	TCT-motif
BamCAD10	1849	1854	TGACG-motif
BamCAD13	1833	1838	TGACG-motif
BamCAD13	122	127	TGACG-motif
BamCAD14	509	514	TGACG-motif
BamCAD14	961	966	TGACG-motif
BamCAD14	1652	1657	TGACG-motif
BamCAD14	1922	1927	TGACG-motif
BamCAD15	5	10	TGACG-motif
BamCAD15	1610	1615	TGACG-motif
BamCAD15	1855	1860	TGACG-motif
BamCAD16	616	621	TGACG-motif
BamCAD16	1602	1607	TGACG-motif
BamCAD2	1912	1917	TGACG-motif
BamCAD3	1773	1768	TGACG-motif
BamCAD3	1803	1798	TGACG-motif
BamCAD3	1806	1801	TGACG-motif
BamCAD4	629	634	TGACG-motif
BamCAD5	1814	1809	TGACG-motif
BamCAD5	1811	1816	TGACG-motif
BamCAD6	1696	1701	TGACG-motif
BamCAD7	1377	1382	TGACG-motif
BamCAD7	1573	1578	TGACG-motif
BamCAD7	1640	1645	TGACG-motif
BamCAD7	1664	1669	TGACG-motif
BamCAD7	1796	1801	TGACG-motif
BamCAD7	1799	1804	TGACG-motif
BamCAD9	656	661	TGACG-motif
BamCAD9	139	144	TGACG-motif
BamCAD9	330	335	TGACG-motif
BamCAD9	475	480	TGACG-motif
GanCAD3	318	313	TGACG-motif
GanCAD5	1244	1239	TGACG-motif
GanCAD5	1701	1696	TGACG-motif
OlaCAD1	1213	1218	TGACG-motif
OlaCAD3	5	10	TGACG-motif
OlaCAD3	194	199	TGACG-motif
OlaCAD3	547	552	TGACG-motif
OlaCAD4	236	231	TGACG-motif
OlaCAD4	245	240	TGACG-motif
OlaCAD4	656	651	TGACG-motif
OlaCAD4	147	142	TGACG-motif
OlaCAD4	1531	1526	TGACG-motif
OlaCAD5	1588	1593	TGACG-motif
OlaCAD5	1591	1596	TGACG-motif
OlaCAD7	1551	1556	TGACG-motif
PheCAD1	848	843	TGACG-motif
PheCAD10	270	265	TGACG-motif
PheCAD10	7	2	TGACG-motif
PheCAD10	72	67	TGACG-motif
PheCAD11	1869	1864	TGACG-motif
PheCAD11	324	319	TGACG-motif
PheCAD11	273	268	TGACG-motif
PheCAD13	112	107	TGACG-motif
PheCAD13	262	257	TGACG-motif
PheCAD14	1204	1199	TGACG-motif
PheCAD2	1562	1557	TGACG-motif
PheCAD2	402	397	TGACG-motif
PheCAD2	822	817	TGACG-motif
PheCAD2	833	828	TGACG-motif
PheCAD3	579	574	TGACG-motif
PheCAD3	1715	1710	TGACG-motif
PheCAD3	369	364	TGACG-motif
PheCAD4	375	370	TGACG-motif
PheCAD4	392	387	TGACG-motif
PheCAD5	1803	1798	TGACG-motif
PheCAD5	193	188	TGACG-motif
PheCAD8	583	578	TGACG-motif
PheCAD8	648	643	TGACG-motif
PheCAD8	1353	1348	TGACG-motif
PheCAD8	1732	1727	TGACG-motif
PheCAD8	1864	1859	TGACG-motif
PheCAD9	379	374	TGACG-motif
PheCAD9	1034	1029	TGACG-motif
PheCAD9	1075	1070	TGACG-motif
RguCAD1	1453	1448	TGACG-motif
RguCAD10	14	9	TGACG-motif
RguCAD10	103	98	TGACG-motif
RguCAD10	581	576	TGACG-motif
RguCAD10	779	774	TGACG-motif
RguCAD10	1363	1358	TGACG-motif
RguCAD10	1558	1553	TGACG-motif
RguCAD10	1585	1580	TGACG-motif
RguCAD10	1952	1947	TGACG-motif
RguCAD11	111	106	TGACG-motif
RguCAD11	275	270	TGACG-motif
RguCAD11	1102	1097	TGACG-motif
RguCAD11	1116	1111	TGACG-motif
RguCAD11	1362	1357	TGACG-motif
RguCAD11	78	73	TGACG-motif

## Sheet: Sheet2
Table S2: Details of Cis-acting elements of Bambusoideae CAD genes
Gene name	start	end	Cis-element
BamCAD10	420	425	ABRE
BamCAD10	813	818	ABRE
BamCAD10	866	871	ABRE
BamCAD10	1648	1653	ABRE
BamCAD10	813	819	ABRE
BamCAD11	734	740	ABRE
BamCAD11	732	741	ABRE
BamCAD11	1034	1039	ABRE
BamCAD11	735	740	ABRE
BamCAD11	1033	1039	ABRE
BamCAD12	318	325	ABRE
BamCAD12	1168	1173	ABRE
BamCAD12	1168	1174	ABRE
BamCAD14	403	408	ABRE
BamCAD14	948	953	ABRE
BamCAD14	1920	1925	ABRE
BamCAD14	402	408	ABRE
BamCAD2	740	745	ABRE
BamCAD2	1014	1019	ABRE
BamCAD2	1158	1163	ABRE
BamCAD2	1216	1221	ABRE
BamCAD2	1476	1481	ABRE
BamCAD2	740	746	ABRE
BamCAD3	1003	1008	ABRE
BamCAD3	1003	997	ABRE
BamCAD3	1003	997	ABRE
BamCAD4	768	774	ABRE
BamCAD4	1012	1017	ABRE
BamCAD4	1310	1315	ABRE
BamCAD5	175	166	ABRE
BamCAD6	365	371	ABRE
BamCAD6	366	371	ABRE
BamCAD7	1935	1940	ABRE
BamCAD7	1826	1832	ABRE
BamCAD8	479	484	ABRE
BamCAD8	1057	1062	ABRE
BamCAD8	6	12	ABRE
BamCAD9	141	146	ABRE
BamCAD9	332	337	ABRE
BamCAD9	613	618	ABRE
BamCAD9	710	715	ABRE
BamCAD9	1123	1132	ABRE
BamCAD9	1126	1131	ABRE
BamCAD9	1141	1147	ABRE
BamCAD9	1142	1147	ABRE
GanCAD2	77	68	ABRE
GanCAD2	1472	1467	ABRE
GanCAD2	1783	1774	ABRE
GanCAD3	333	328	ABRE
GanCAD3	718	712	ABRE
GanCAD3	719	714	ABRE
GanCAD5	1304	1299	ABRE
GanCAD5	1686	1681	ABRE
GanCAD5	428	418	ABRE
OlaCAD2	671	680	ABRE
OlaCAD2	856	865	ABRE
OlaCAD2	859	864	ABRE
OlaCAD2	1700	1706	ABRE
OlaCAD2	1701	1706	ABRE
OlaCAD3	1510	1515	ABRE
OlaCAD3	1879	1888	ABRE
OlaCAD3	427	436	ABRE
OlaCAD3	713	718	ABRE
OlaCAD3	913	922	ABRE
OlaCAD3	915	921	ABRE
OlaCAD3	916	921	ABRE
OlaCAD3	713	719	ABRE
OlaCAD4	138	133	ABRE
OlaCAD6	815	824	ABRE
OlaCAD7	384	389	ABRE
PheCAD10	153	147	ABRE
PheCAD10	428	419	ABRE
PheCAD10	154	149	ABRE
PheCAD11	580	575	ABRE
PheCAD11	1577	1572	ABRE
PheCAD12	183	178	ABRE
PheCAD12	679	674	ABRE
PheCAD13	1272	1266	ABRE
PheCAD13	1273	1268	ABRE
PheCAD2	1946	1941	ABRE
PheCAD2	1488	1478	ABRE
PheCAD2	1489	1479	ABRE
PheCAD2	1491	1485	ABRE
PheCAD2	1492	1487	ABRE
PheCAD3	1535	1530	ABRE
PheCAD3	1693	1688	ABRE
PheCAD3	1700	1691	ABRE
PheCAD3	1864	1855	ABRE
PheCAD3	1534	1528	ABRE
PheCAD3	1693	1687	ABRE
PheCAD3	1951	1945	ABRE
PheCAD3	1534	1528	ABRE
PheCAD3	1693	1687	ABRE
PheCAD3	1951	1945	ABRE
PheCAD4	14	9	ABRE
PheCAD4	280	271	ABRE
PheCAD4	610	605	ABRE
PheCAD5	96	89	ABRE
PheCAD5	318	313	ABRE
PheCAD5	334	329	ABRE
PheCAD5	618	613	ABRE
PheCAD5	628	622	ABRE
PheCAD5	629	624	ABRE
PheCAD5	958	949	ABRE
PheCAD5	960	955	ABRE
PheCAD5	1825	1820	ABRE
PheCAD5	1851	1842	ABRE
PheCAD5	317	311	ABRE
PheCAD5	334	328	ABRE
PheCAD5	960	954	ABRE
PheCAD5	1825	1819	ABRE
PheCAD7	258	249	ABRE
PheCAD7	724	719	ABRE
PheCAD7	1507	1501	ABRE
PheCAD8	915	906	ABRE
PheCAD8	317	311	ABRE
PheCAD9	1850	1844	ABRE
RguCAD1	566	557	ABRE
RguCAD10	1084	1079	ABRE
RguCAD11	277	272	ABRE
RguCAD11	694	689	ABRE
RguCAD11	726	721	ABRE
RguCAD11	848	843	ABRE
RguCAD11	850	841	ABRE
RguCAD11	1108	1098	ABRE
RguCAD11	1268	1259	ABRE
RguCAD11	1271	1266	ABRE
RguCAD11	1767	1762	ABRE
BamCAD1	1847	1852	CGTCA-motif
BamCAD11	401	406	CGTCA-motif
BamCAD11	549	554	CGTCA-motif
BamCAD13	122	127	CGTCA-motif
BamCAD13	1833	1838	CGTCA-motif
BamCAD14	509	514	CGTCA-motif
BamCAD14	961	966	CGTCA-motif
BamCAD14	1652	1657	CGTCA-motif
BamCAD14	1922	1927	CGTCA-motif
BamCAD15	5	10	CGTCA-motif
BamCAD15	1644	1649	CGTCA-motif
BamCAD16	499	504	CGTCA-motif
BamCAD16	616	621	CGTCA-motif
BamCAD2	178	183	CGTCA-motif
BamCAD2	1213	1218	CGTCA-motif
BamCAD2	1452	1457	CGTCA-motif
BamCAD4	629	634	CGTCA-motif
BamCAD4	1010	1015	CGTCA-motif
BamCAD4	1824	1829	CGTCA-motif
BamCAD5	1811	1806	CGTCA-motif
BamCAD5	1814	1819	CGTCA-motif
BamCAD6	159	164	CGTCA-motif
BamCAD7	1799	1804	CGTCA-motif
BamCAD7	1796	1801	CGTCA-motif
BamCAD7	1377	1382	CGTCA-motif
BamCAD7	1640	1645	CGTCA-motif
BamCAD7	1664	1669	CGTCA-motif
BamCAD7	1573	1578	CGTCA-motif
BamCAD9	139	144	CGTCA-motif
BamCAD9	475	480	CGTCA-motif
BamCAD9	1501	1506	CGTCA-motif
GanCAD3	318	313	CGTCA-motif
GanCAD5	807	802	CGTCA-motif
OlaCAD1	1213	1218	CGTCA-motif
OlaCAD2	497	502	CGTCA-motif
OlaCAD5	1588	1593	CGTCA-motif
OlaCAD5	1591	1596	CGTCA-motif
OlaCAD7	996	1001	CGTCA-motif
OlaCAD7	1551	1556	CGTCA-motif
PheCAD1	6	1	CGTCA-motif
PheCAD1	276	271	CGTCA-motif
PheCAD1	641	636	CGTCA-motif
PheCAD1	721	716	CGTCA-motif
PheCAD1	848	843	CGTCA-motif
PheCAD10	72	67	CGTCA-motif
PheCAD10	438	433	CGTCA-motif
PheCAD10	464	459	CGTCA-motif
PheCAD10	910	905	CGTCA-motif
PheCAD11	1416	1411	CGTCA-motif
PheCAD11	1869	1864	CGTCA-motif
PheCAD3	369	364	CGTCA-motif
PheCAD3	579	574	CGTCA-motif
PheCAD3	1715	1710	CGTCA-motif
PheCAD3	1812	1807	CGTCA-motif
PheCAD4	375	370	CGTCA-motif
PheCAD4	392	387	CGTCA-motif
PheCAD4	242	237	CGTCA-motif
PheCAD7	1126	1121	CGTCA-motif
PheCAD7	1777	1772	CGTCA-motif
PheCAD8	583	578	CGTCA-motif
PheCAD8	648	643	CGTCA-motif
PheCAD8	1353	1348	CGTCA-motif
PheCAD8	1732	1727	CGTCA-motif
PheCAD8	1864	1859	CGTCA-motif
PheCAD9	379	374	CGTCA-motif
PheCAD9	1034	1029	CGTCA-motif
PheCAD9	1075	1070	CGTCA-motif
RguCAD10	14	9	CGTCA-motif
RguCAD10	103	98	CGTCA-motif
RguCAD10	1585	1580	CGTCA-motif
RguCAD10	1952	1947	CGTCA-motif
RguCAD10	581	576	CGTCA-motif
RguCAD11	1362	1357	CGTCA-motif
RguCAD11	1116	1111	CGTCA-motif
BamCAD5	793	786	GARE-motif
GanCAD6	1495	1488	GARE-motif
PheCAD1	534	527	GARE-motif
PheCAD1	1816	1809	GARE-motif
PheCAD13	269	262	GARE-motif
PheCAD9	830	823	GARE-motif
BamCAD10	85	91	LTR
BamCAD10	1757	1763	LTR
BamCAD12	1306	1312	LTR
BamCAD15	1508	1514	LTR
BamCAD5	453	447	LTR
BamCAD6	1542	1548	LTR
BamCAD7	1586	1592	LTR
GanCAD3	171	165	LTR
GanCAD3	1098	1092	LTR
GanCAD3	1979	1973	LTR
OlaCAD2	24	30	LTR
OlaCAD2	1321	1327	LTR
OlaCAD3	1094	1100	LTR
OlaCAD5	1514	1520	LTR
PheCAD11	883	877	LTR
PheCAD12	877	871	LTR
PheCAD2	322	316	LTR
PheCAD2	512	506	LTR
PheCAD5	255	249	LTR
PheCAD5	1231	1225	LTR
PheCAD7	154	148	LTR
BamCAD1	262	268	MBS
BamCAD12	1267	1273	MBS
BamCAD12	1712	1718	MBS
BamCAD13	1928	1934	MBS
BamCAD8	301	307	MBS
GanCAD2	908	902	MBS
OlaCAD4	522	516	MBS
OlaCAD4	309	303	MBS
PheCAD11	1213	1207	MBS
PheCAD11	1845	1839	MBS
PheCAD13	54	48	MBS
PheCAD14	1845	1839	MBS
PheCAD3	1683	1677	MBS
PheCAD3	38	32	MBS
PheCAD8	1962	1956	MBS
RguCAD5	1	-5	MBS
BamCAD5	765	772	MRE
BamCAD1	1862	1868	MYB
BamCAD1	1038	1044	MYB
BamCAD10	199	205	MYB
BamCAD10	440	446	MYB
BamCAD10	1081	1087	MYB
BamCAD11	1049	1055	MYB
BamCAD11	1353	1359	MYB
BamCAD11	1463	1469	MYB
BamCAD11	1827	1833	MYB
BamCAD12	1016	1022	MYB
BamCAD12	1562	1568	MYB
BamCAD12	1712	1718	MYB
BamCAD12	719	725	MYB
BamCAD14	273	279	MYB
BamCAD14	736	742	MYB
BamCAD14	1002	1008	MYB
BamCAD14	1006	1012	MYB
BamCAD15	992	998	MYB
BamCAD15	1676	1682	MYB
BamCAD16	152	158	MYB
BamCAD16	362	368	MYB
BamCAD16	971	977	MYB
BamCAD2	714	720	MYB
BamCAD2	1606	1612	MYB
BamCAD3	599	593	MYB
BamCAD5	527	521	MYB
BamCAD5	793	799	MYB
BamCAD6	153	159	MYB
BamCAD6	313	319	MYB
BamCAD6	673	679	MYB
BamCAD6	1659	1665	MYB
BamCAD6	670	676	MYB
BamCAD7	1371	1377	MYB
BamCAD8	468	474	MYB
BamCAD8	301	307	MYB
BamCAD9	1059	1065	MYB
BamCAD9	1351	1357	MYB
BamCAD9	1658	1664	MYB
BamCAD9	1	7	MYB
BamCAD9	732	738	MYB
BamCAD9	955	961	MYB
GanCAD2	387	381	MYB
GanCAD2	1317	1311	MYB
GanCAD5	108	102	MYB
GanCAD5	289	283	MYB
GanCAD6	1926	1920	MYB
GanCAD6	576	570	MYB
GanCAD6	592	586	MYB
GanCAD6	924	918	MYB
GanCAD6	990	984	MYB
OlaCAD1	729	735	MYB
OlaCAD3	1768	1774	MYB
OlaCAD3	1224	1230	MYB
OlaCAD4	323	317	MYB
OlaCAD4	1324	1318	MYB
OlaCAD5	76	82	MYB
OlaCAD5	562	568	MYB
OlaCAD6	1489	1495	MYB
OlaCAD6	1493	1499	MYB
OlaCAD7	1304	1310	MYB
OlaCAD7	1540	1546	MYB
OlaCAD7	681	687	MYB
OlaCAD7	1329	1335	MYB
PheCAD1	291	285	MYB
PheCAD1	534	528	MYB
PheCAD1	1041	1035	MYB
PheCAD1	1817	1811	MYB
PheCAD10	273	267	MYB
PheCAD10	1603	1597	MYB
PheCAD11	1845	1839	MYB
PheCAD12	1523	1517	MYB
PheCAD12	75	69	MYB
PheCAD12	940	934	MYB
PheCAD12	1186	1180	MYB
PheCAD12	1878	1872	MYB
PheCAD13	54	48	MYB
PheCAD13	330	324	MYB
PheCAD13	269	263	MYB
PheCAD13	289	283	MYB
PheCAD13	350	344	MYB
PheCAD13	385	379	MYB
PheCAD14	1845	1839	MYB
PheCAD2	702	696	MYB
PheCAD2	1455	1449	MYB
PheCAD4	1817	1811	MYB
PheCAD4	314	308	MYB
PheCAD4	790	784	MYB
PheCAD6	1570	1564	MYB
PheCAD6	1864	1858	MYB
PheCAD6	1278	1272	MYB
PheCAD7	1140	1134	MYB
PheCAD7	26	20	MYB
PheCAD8	1819	1813	MYB
PheCAD8	1962	1956	MYB
PheCAD8	1215	1209	MYB
PheCAD8	1606	1600	MYB
PheCAD9	700	694	MYB
PheCAD9	759	753	MYB
PheCAD9	1706	1700	MYB
PheCAD9	1979	1973	MYB
PheCAD9	830	824	MYB
PheCAD9	1078	1072	MYB
PheCAD9	1287	1281	MYB
PheCAD9	1595	1589	MYB
PheCAD9	1649	1643	MYB
RguCAD1	22	16	MYB
RguCAD1	306	300	MYB
RguCAD5	434	428	MYB
RguCAD5	1909	1903	MYB
BamCAD10	315	322	P-box
GanCAD6	1588	1581	P-box
PheCAD12	1389	1382	P-box
PheCAD2	1476	1469	P-box
PheCAD6	1016	1009	P-box
BamCAD14	487	496	TCA-element
BamCAD14	713	722	TCA-element
BamCAD15	1442	1451	TCA-element
BamCAD2	756	765	TCA-element
BamCAD7	1022	1031	TCA-element
BamCAD9	1308	1317	TCA-element
OlaCAD5	1425	1434	TCA-element
PheCAD11	259	250	TCA-element
PheCAD11	1232	1223	TCA-element
PheCAD14	535	526	TCA-element
PheCAD14	833	824	TCA-element
PheCAD14	532	523	TCA-element
PheCAD2	1841	1832	TCA-element
PheCAD3	12	3	TCA-element
PheCAD4	516	507	TCA-element
PheCAD6	615	606	TCA-element
PheCAD8	805	796	TCA-element
PheCAD9	768	759	TCA-element
RguCAD11	625	615	TCA-element
RguCAD5	245	236	TCA-element
RguCAD5	448	439	TCA-element
BamCAD5	1379	1385	TCT-motif
BamCAD10	1849	1854	TGACG-motif
BamCAD13	1833	1838	TGACG-motif
BamCAD13	122	127	TGACG-motif
BamCAD14	509	514	TGACG-motif
BamCAD14	961	966	TGACG-motif
BamCAD14	1652	1657	TGACG-motif
BamCAD14	1922	1927	TGACG-motif
BamCAD15	5	10	TGACG-motif
BamCAD15	1610	1615	TGACG-motif
BamCAD15	1855	1860	TGACG-motif
BamCAD16	616	621	TGACG-motif
BamCAD16	1602	1607	TGACG-motif
BamCAD2	1912	1917	TGACG-motif
BamCAD3	1773	1768	TGACG-motif
BamCAD3	1803	1798	TGACG-motif
BamCAD3	1806	1801	TGACG-motif
BamCAD4	629	634	TGACG-motif
BamCAD5	1814	1809	TGACG-motif
BamCAD5	1811	1816	TGACG-motif
BamCAD6	1696	1701	TGACG-motif
BamCAD7	1377	1382	TGACG-motif
BamCAD7	1573	1578	TGACG-motif
BamCAD7	1640	1645	TGACG-motif
BamCAD7	1664	1669	TGACG-motif
BamCAD7	1796	1801	TGACG-motif
BamCAD7	1799	1804	TGACG-motif
BamCAD9	656	661	TGACG-motif
BamCAD9	139	144	TGACG-motif
BamCAD9	330	335	TGACG-motif
BamCAD9	475	480	TGACG-motif
GanCAD3	318	313	TGACG-motif
GanCAD5	1244	1239	TGACG-motif
GanCAD5	1701	1696	TGACG-motif
OlaCAD1	1213	1218	TGACG-motif
OlaCAD3	5	10	TGACG-motif
OlaCAD3	194	199	TGACG-motif
OlaCAD3	547	552	TGACG-motif
OlaCAD4	236	231	TGACG-motif
OlaCAD4	245	240	TGACG-motif
OlaCAD4	656	651	TGACG-motif
OlaCAD4	147	142	TGACG-motif
OlaCAD4	1531	1526	TGACG-motif
OlaCAD5	1588	1593	TGACG-motif
OlaCAD5	1591	1596	TGACG-motif
OlaCAD7	1551	1556	TGACG-motif
PheCAD1	848	843	TGACG-motif
PheCAD10	270	265	TGACG-motif
PheCAD10	7	2	TGACG-motif
PheCAD10	72	67	TGACG-motif
PheCAD11	1869	1864	TGACG-motif
PheCAD11	324	319	TGACG-motif
PheCAD11	273	268	TGACG-motif
PheCAD13	112	107	TGACG-motif
PheCAD13	262	257	TGACG-motif
PheCAD14	1204	1199	TGACG-motif
PheCAD2	1562	1557	TGACG-motif
PheCAD2	402	397	TGACG-motif
PheCAD2	822	817	TGACG-motif
PheCAD2	833	828	TGACG-motif
PheCAD3	579	574	TGACG-motif
PheCAD3	1715	1710	TGACG-motif
PheCAD3	369	364	TGACG-motif
PheCAD4	375	370	TGACG-motif
PheCAD4	392	387	TGACG-motif
PheCAD5	1803	1798	TGACG-motif
PheCAD5	193	188	TGACG-motif
PheCAD8	583	578	TGACG-motif
PheCAD8	648	643	TGACG-motif
PheCAD8	1353	1348	TGACG-motif
PheCAD8	1732	1727	TGACG-motif
PheCAD8	1864	1859	TGACG-motif
PheCAD9	379	374	TGACG-motif
PheCAD9	1034	1029	TGACG-motif
PheCAD9	1075	1070	TGACG-motif
RguCAD1	1453	1448	TGACG-motif
RguCAD10	14	9	TGACG-motif
RguCAD10	103	98	TGACG-motif
RguCAD10	581	576	TGACG-motif
RguCAD10	779	774	TGACG-motif
RguCAD10	1363	1358	TGACG-motif
RguCAD10	1558	1553	TGACG-motif
RguCAD10	1585	1580	TGACG-motif
RguCAD10	1952	1947	TGACG-motif
RguCAD11	111	106	TGACG-motif
RguCAD11	275	270	TGACG-motif
RguCAD11	1102	1097	TGACG-motif
RguCAD11	1116	1111	TGACG-motif
RguCAD11	1362	1357	TGACG-motif
RguCAD11	78	73	TGACG-motif
