# Supplementary material for: Homo- and Hetero-Dimers of CAD Enzymes Regulate Lignification and Abiotic Stress Response in Moso Bamboo
Source: Int J Mol Sci. 2021 Nov 29;22(23):12917. doi: 10.3390/ijms222312917 (PMC8657895; doi:10.3390/ijms222312917)
Supplement: Supplementary file 1 [file ijms-22-12917-s001.zip › Supplementary files/Table S3.xlsx]

## Sheet: Sheet1
Table S3: FPKM values of lignin biosynthesis enzymes used in this study
CAD	bud_Rhizhome	lower_bud_shoot_3m	Shoot_middle_bud_3m	top_bud_shoot_3m	leaf	leaf_sheath	Shoot_lower_0.2m	Shoot_lower_1.5m	Shoot_lower_3m	Shoot_lower_6.7m	Shoot_middle0.2m	Shoot_middle1.5m	Shoot_middle_3m	Shoot_middle6.7m	top_shoot_0.2m	top_shoot_1.5m	top_shoot_3m	top_shoot_6.7m	rhizome	Root_lateral root	Root_rhizhome	root on shoot_0.1cm	root on shoot_0.5cm	root on shoot_10cm	root on shoot_2cm	Sheath_sheet
PH02Gene04778	6.69115	3.16911	3.09764	6.98376	0.485264	3.45142	3.14596	22.0919	1.18664	5.11938	15.9275	1.36805	10.8351	3.75458	7.34099	16.7706	4.04363	3.42627	0.0877	38.2446	2.3743	0.241552	0.276524	7.64264	3.03632	0.119509
PH02Gene13791	43.5586	46.8195	8.5747	8.42676	1.27132	48.8736	2.18676	0.0516731	1.12888	0.212633	0.127071	1.71172	0.849744	0.416668	0.857149	0.0540535	0.666564	0.203815	0.0121222	0	2.07461	0.0538107	0.445295	0.198676	0.44934	0.098091
PH02Gene39617	720.593	352.742	41.7071	85.6173	9.42089	98.4119	35.3363	342.836	73.0139	4.72583	596.433	88.9844	155.516	5.90278	150.658	288.261	42.3688	13.8504	102.269	876.122	20.8741	139.503	92.3781	273.233	10.0151	187.56
PH02Gene48685	9.36802	2.64487	0.181947	1.29535	2.37751	1.01063	0.0684038	5.09768	6.99075	0	4.72712	17.7867	27.7082	0.0860653	0.782887	1.54718	5.0724	0.168689	0.0486733	2.0151	0.032443	0.104002	0.863307	0.220443	0.370085	1.82644
PH02Gene13789	10.7262	18.1615	3.58074	3.22347	42.0147	13.813	114.968	13.4912	28.5828	36.6265	4.23196	34.3288	34.3566	71.7119	34.5915	21.2856	48.9908	97.6991	2.67573	11.1818	111.499	13.5385	19.2286	40.9917	19.5235	0.486816
PH02Gene38470	0	0	0	0	0	0	0	0	0.86509	0	0	0	9.0107	0	0.0117437	0.0471065	25.4885	0.00780249	0	0	0	0	0	0	0	0
PH02Gene48202	5.17188	7.03517	1.00586	2.88997	0.222089	0.484171	41.4406	19.6265	0.0513114	15.0082	81.8476	6.19463	0.860035	14.3789	106.543	88.1965	0.853344	35.3015	0.210407	52.7442	57.1135	0.320512	0.114173	146.039	63.198	0.0537939
PH02Gene49901	17.8115	28.2519	32.1983	13.701	0.055571	5.01693	61.9167	2.95413	6.1309	10.7663	7.34452	10.9581	57.4555	20.7504	49.1263	36.5606	54.3925	20.95	0.132346	4.77949	88.6513	4.95381	0.192079	20.0426	13.2522	0
PH02Gene32740	0.138356	0.135758	0.067967	0.430378	0.898978	0.111372	4.67016	0.178865	0.027586	4.98285	0.188015	0.145394	0.266492	5.81638	0.857536	0.195555	0.216214	6.0843	0.077438	0.69453	5.09719	0.148988	0	4.30279	0.668593	0.083463
PH02Gene46268	37.158	31.2732	13.2142	18.0573	75.0315	24.4523	9.93032	43.8582	27.5837	5.68444	51.2008	74.1788	35.0732	6.9105	25.5176	26.2921	18.1216	9.25517	31.9213	28.6013	9.2798	42.4065	43.9738	17.3438	7.33432	48.9301
PH02Gene38471	0	0	0	0	0	0.157776	0.07524	0.021412	0.126479	0.971005	0	0	0.048593	0.179898	0.156161	0	1.48348	0.052509	0	0	0.019054	0	0	5.76448	2.75065	0
PH02Gene44682	9.36802	2.64487	0.181947	1.29535	2.37751	1.01063	0.0684038	5.09768	6.99075	0	4.72712	17.7867	27.7082	0.0860653	0.782887	1.54718	5.0724	0.168689	0.0486733	2.0151	0.032443	0.104002	0.863307	0.220443	0.370085	1.82644
PH02Gene13790	7.2722	6.95648	0.813776	0.551714	0.219439	6.43799	0.691889	0	0.047187	0	0	0.25044	0	0	0	0	0	0	0	0	0.189699	0	0	0	0	0
PH02Gene26598	0.206481	0	0	0.073883	0	0.018685	0.131776	1.56616	0.018732	0.05704	1.83365	0.304712	1.63773	0.038087	0.456544	1.66022	0.493603	0.087148	0.178903	2.3753	0.255001	0.130038	0.086287	0.578314	0.182494	0.02206
4CL	bud_Rhizhome	lower_bud_shoot_3m	Shoot_middle_bud_3m	top_bud_shoot_3m	leaf	leaf_sheath	Shoot_lower_0.2m	Shoot_lower_1.5m	Shoot_lower_3m	Shoot_lower_6.7m	Shoot_middle0.2m	Shoot_middle1.5m	Shoot_middle_3m	Shoot_middle6.7m	top_shoot_0.2m	top_shoot_1.5m	top_shoot_3m	top_shoot_6.7m	rhizome	Root_lateral root	Root_rhizhome	root on shoot_0.1cm	root on shoot_0.5cm	root on shoot_10cm	root on shoot_2cm	Sheath_sheet
PH02Gene09462	3.97785	0.661158	5.11066	6.65578	2.39533	4.40034	10.9462	0.114375	7.10506	12.5444	0.053994	0.684091	6.87403	11.3567	4.53452	0.195411	2.63481	10.9	0	0.383308	13.125	0.134019	0.122999	7.17366	12.668	0
PH02Gene00825	67.2992	39.6083	33.0097	29.8631	11.8677	39.7454	4.12985	16.0724	47.8986	3.95998	21.1065	25.6818	33.1653	5.11398	13.7254	39.3791	14.3308	11.9146	22.0211	29.0602	1.90637	31.9978	22.3742	8.88031	0.583386	46.5122
PH02Gene03956	0	0	0	0	0.228443	0	0.196188	0	0.68856	2.55704	0	0	0.41397	3.06157	0.009493	0	0.730731	1.56301	0	0.089849	0.150129	0	0	0.380839	6.74846	0
PH02Gene45698	22.26	30.8518	6.09733	4.80717	29.3442	15.8755	8.49779	48.6882	11.7854	9.3647	28.4379	46.9193	8.91092	9.0642	25.4436	26.2707	6.02523	9.64171	70.4144	27.2502	7.93239	88.9794	135.808	46.7852	11.5268	62.4828
PH02Gene03593	8.31655	9.21967	7.57384	5.45698	1.31822	7.34314	0.649791	0.073977	94.5675	1.56524	0.072418	5.36788	35.4893	1.70636	0.23806	0.26115	13.5102	1.57278	84.3361	1.06744	0.778136	53.9502	41.2157	2.31727	2.34522	61.0373
PH02Gene24626	0.178973	0.045122	0.14591	0.465005	0.38102	0.370837	1.05261	0.046592	1.05049	1.55218	0	0.952415	1.07101	1.12318	0.027594	0.04533	2.10113	1.4121	0	0	1.0216	0.120127	0.088244	0.020809	0.799794	0.072993
PH02Gene29549	0.030997	0	0	0	0	0	0	0	0.015335	0.02908	0	0	0	0	0	0	0	0.015397	0	0	0	0	0	0	0	0
PH02Gene22533	21.8788	20.0032	3.94419	2.39163	0	2.15186	0.696383	2.62261	58.7984	0.206554	13.3643	2.55225	7.55421	0.25117	1.91548	4.98783	8.76235	0.258516	1.33382	9.33956	0.183231	6.76135	4.49163	1.20299	0.04803	7.09608
PH02Gene03793	1.82662	0.321247	7.43201	10.6813	0.218644	1.64791	0.17391	0.056111	12.5672	0.616069	0.038939	0.044762	3.70407	0.54505	0.057026	0.059188	72.4878	1.6565	0.108279	0	0.058935	0.063479	0.043945	0.819261	0.004448	0.040995
PH02Gene42739	23.946	23.9351	3.99904	7.47253	0.052733	24.5018	0.132672	1.57878	1.66904	0.24086	7.38765	0.554377	7.26466	0.407832	5.18878	3.3	3.43745	0.314799	1.20098	12.474	0.115333	1.58145	1.29267	2.54048	0.059618	4.6468
PH02Gene31552	0.121305	0.281117	0.401168	0.073747	0	0	0	0	6.91974	0	0.016851	0.039651	0.022444	0.031322	0	0	0	0.028484	0	0	0	0.113683	0	0.028937	0	0
PH02Gene22501	141.371	96.3814	30.209	37.0952	4.48352	28.4056	6.00472	121.256	9.97484	7.44537	150.177	25.0944	18.313	6.16881	74.912	81.4092	33.3703	9.7151	33.9686	83.4118	4.09344	28.9473	35.6087	41.0878	2.56288	50.929
PH02Gene34989	59.1652	70.8233	33.9591	30.8679	4.66077	25.4651	19.0676	43.7873	9.10395	22.401	108.802	16.5042	5.69851	18.304	50.773	83.5402	9.8301	26.7698	17.8885	85.8664	6.34438	14.6232	12.1511	32.9648	1.57441	14.0387
PH02Gene26838	860.614	166.2	50.8056	81.8801	5.94229	131.149	21.7733	525.859	101.044	2.8611	735.711	99.555	240.733	2.97492	195.465	394.01	121.234	7.0185	21.3097	828.23	11.4564	51.1936	45.7166	165.593	6.97343	45.1318
PH02Gene04832	343.472	71.4697	12.2017	20.349	0.235463	42.4952	1.72441	102.456	2.22137	1.37129	190.888	7.41352	55.7946	0.672069	56.4179	95.4847	39.6263	0.689056	0.189065	212.959	1.28519	0.465705	0.127675	67.0462	1.433	2.74471
PH02Gene45699	22.26	30.8518	6.09733	4.80717	29.3442	15.8755	8.49779	48.6882	11.7854	9.3647	28.4379	46.9193	8.91092	9.0642	25.4436	26.2707	6.02523	9.64171	70.4144	27.2502	7.93239	88.9794	135.808	46.7852	11.5268	62.4828
C3H	bud_Rhizhome	lower_bud_shoot_3m	Shoot_middle_bud_3m	top_bud_shoot_3m	leaf	leaf_sheath	Shoot_lower_0.2m	Shoot_lower_1.5m	Shoot_lower_3m	Shoot_lower_6.7m	Shoot_middle0.2m	Shoot_middle1.5m	Shoot_middle_3m	Shoot_middle6.7m	top_shoot_0.2m	top_shoot_1.5m	top_shoot_3m	top_shoot_6.7m	rhizome	Root_lateral root	Root_rhizhome	root on shoot_0.1cm	root on shoot_0.5cm	root on shoot_10cm	root on shoot_2cm	Sheath_sheet
PH02Gene02368	60.8676	32.8966	19.8117	26.924	1.06438	16.7319	3.52346	21.4623	14.3065	1.03639	43.3537	15.9687	8.65803	1.21372	38.5839	34.8165	4.36102	2.92865	2.86618	68.4973	2.57013	18.6601	7.75444	45.9143	1.26094	18.2284
PH02Gene43237	332.558	222.335	76.7933	98.3445	10.8497	125.365	21.4573	89.8871	51.0995	12.8192	239.178	55.5543	21.5023	12.9147	155.994	180.316	14.2499	28.269	50.8818	259.815	14.339	66.3043	26.6766	158.001	18.0917	50.5087
PH02Gene03849	206.948	101.182	6.54987	17.6708	5.39246	27.6814	6.78169	76.8557	96.3595	1.31347	73.1359	30.143	331.166	1.97175	38.9179	64.945	224.648	8.43988	12.4502	43.869	2.12141	10.9703	39.2821	38.6487	0.812357	134.184
C4H	bud_Rhizhome	lower_bud_shoot_3m	Shoot_middle_bud_3m	top_bud_shoot_3m	leaf	leaf_sheath	Shoot_lower_0.2m	Shoot_lower_1.5m	Shoot_lower_3m	Shoot_lower_6.7m	Shoot_middle0.2m	Shoot_middle1.5m	Shoot_middle_3m	Shoot_middle6.7m	top_shoot_0.2m	top_shoot_1.5m	top_shoot_3m	top_shoot_6.7m	rhizome	Root_lateral root	Root_rhizhome	root on shoot_0.1cm	root on shoot_0.5cm	root on shoot_10cm	root on shoot_2cm	Sheath_sheet
PH02Gene04447	55.9716	30.0854	7.81788	13.3398	1.05378	10.177	15.3419	34.9426	34.8499	2.47409	47.7982	18.5181	3.65764	2.22354	36.1669	78.6611	4.79889	4.95979	12.1038	10.8701	12.797	32.1788	9.84973	7.4851	0.301316	14.7909
PH02Gene46974	64.5071	43.4288	44.436	50.8761	0.055086	83.2768	0.106211	0.143975	98.4273	0.067537	0.35273	0.456928	5.90639	0.501894	0.129993	0.060336	29.2731	0.301376	3.57906	0.27118	0.051576	5.19745	2.23834	0.348629	0.031943	8.09887
PH02Gene44264	50.9344	18.4832	10.6958	9.12147	0.216889	23.5755	0.551775	0.217085	23.2098	0.126311	0.300858	4.06569	1.85713	0.020586	3.77391	2.01303	0.206429	0.299469	34.5441	2.49779	0.07738	25.7508	14.8223	1.09336	0.030825	32.9433
PH02Gene03697	164.113	88.7175	45.6055	64.9007	3.02012	38.6537	5.49161	86.17	75.1177	3.59749	200.73	42.2555	35.3115	3.55828	90.0693	114.309	101.013	8.73135	39.018	145.889	3.73428	89.0695	8.62619	50.3181	1.18574	36.3631
PH02Gene38832	7.54762	20.9749	28.4462	6.52257	0	10.634	0.194883	0.997175	13.1641	1.55848	4.88524	0.344964	0	5.32496	1.24114	4.35053	0.268176	8.41048	0.016055	0	0.031867	4.18455	0.103822	0.217165	0	0.017804
PH02Gene41975	7.9765	14.2986	6.43009	1.14318	0	1.88047	6.0749	0.867348	18.7892	5.74862	4.19077	0.133132	0.153592	20.049	6.06965	8.88487	1.82033	32.7283	0.160709	0.064636	5.18472	6.57034	2.12453	0.097735	0.237723	0
CCoAOMT	bud_Rhizhome	lower_bud_shoot_3m	Shoot_middle_bud_3m	top_bud_shoot_3m	leaf	leaf_sheath	Shoot_lower_0.2m	Shoot_lower_1.5m	Shoot_lower_3m	Shoot_lower_6.7m	Shoot_middle0.2m	Shoot_middle1.5m	Shoot_middle_3m	Shoot_middle6.7m	top_shoot_0.2m	top_shoot_1.5m	top_shoot_3m	top_shoot_6.7m	rhizome	Root_lateral root	Root_rhizhome	root on shoot_0.1cm	root on shoot_0.5cm	root on shoot_10cm	root on shoot_2cm	Sheath_sheet
PH02Gene37560	4.15102	3.45234	0.658668	1.98991	3.18417	1.81795	5.31698	10.595	13.9779	12.644	5.80719	1.41913	5.18475	12.6748	4.70728	6.70123	3.07689	9.32918	8.56742	1.06843	6.19035	5.76387	4.97163	0.944908	5.72814	2.77424
PH02Gene17241	315.506	175.253	101.709	154.111	3.14129	172.551	24.8725	88.4149	57.4666	17.8581	313.539	76.1071	29.1133	26.4749	224.939	212.538	76.5959	35.5102	14.8465	523.288	20.1876	68.9096	16.2948	313.722	23.4656	14.6398
PH02Gene12695	637.778	642.325	456.944	415.083	3.9712	467.339	52.7808	60.8104	94.7191	60.5287	213.265	137.387	39.13	82.8613	328.095	177.464	58.9598	107.026	131.251	440.078	39.6805	210.302	100.28	428.662	27.2122	47.1311
PH02Gene05833	0	0	0	0.089279	0	0	0	0	0	0	0	0	0	0	0	0	0	0.060781	0.20003	0	0	0	0	0	0	0
PH02Gene07558	4.19573	5.40896	3.08449	6.27101	0.931367	3.76611	2.56802	7.983	108.759	2.11671	10.6493	23.8851	6.92936	2.789	6.35911	17.3258	3.25628	5.37936	1.5267	5.67435	0.670333	17.6112	20.0569	1.44744	0.055293	13.3355
PH02Gene31245	191.219	192.738	103.288	89.37	14.1481	138.757	24.1636	3.56812	0.250098	8.7983	24.4961	11.9066	1.77784	8.39773	62.6549	16.241	0.34414	6.61678	1.93697	62.5781	27.0289	4.37875	3.0735	43.2011	13.4384	3.38048
PH02Gene50882	9.57187	0.073594	0.113882	0.754108	0.518187	0.281518	0	0	0	0.065016	0.202773	1.26973	1.15172	0	0.063064	1.9104	0.494585	0	0	1.65478	0	0.813768	2.23747	0	0	0
PH02Gene46700.1	22.7288	3.77376	0.634979	3.51363	1.20777	30.6219	2.90287	6.99664	2.14976	5.85552	9.3475	2.58371	3.82558	4.05191	6.10968	4.01087	3.16047	3.38	11.9356	3.72481	2.40128	4.76197	4.22311	0.383733	3.16693	16.6606
PH02Gene46700.2	0.233226	0	0	0	0.04267	5.81062	0	0.097183	0	0.047003	0.035071	0.040904	0	0.012685	0	0.030966	0	0	0.150445	0	0	0.046699	0.074802	0	0	0.382198
CCR	bud_Rhizhome	lower_bud_shoot_3m	Shoot_middle_bud_3m	top_bud_shoot_3m	leaf	leaf_sheath	Shoot_lower_0.2m	Shoot_lower_1.5m	Shoot_lower_3m	Shoot_lower_6.7m	Shoot_middle0.2m	Shoot_middle1.5m	Shoot_middle_3m	Shoot_middle6.7m	top_shoot_0.2m	top_shoot_1.5m	top_shoot_3m	top_shoot_6.7m	rhizome	Root_lateral root	Root_rhizhome	root on shoot_0.1cm	root on shoot_0.5cm	root on shoot_10cm	root on shoot_2cm	Sheath_sheet
PH02Gene14706	22.4201	7.15356	1.35378	5.25314	3.13377	2.9759	2.88894	31.2407	5.04195	3.38492	27.5626	9.82411	21.2839	3.7541	10.6118	14.4495	10.5319	4.09255	1.21238	30.0218	2.63385	4.97536	2.43783	13.0597	0.821713	2.22545
PH02Gene04803	2.93824	4.87949	2.97477	3.39825	0.182551	3.3833	5.86326	0.294544	4.69739	11.9032	1.00305	2.19709	8.30697	8.35709	3.68575	4.19186	3.17661	16.1569	0.495765	1.56875	5.40805	3.48113	0.210624	3.02181	2.16153	1.66439
PH02Gene04631	53.5227	35.7496	25.7604	23.8708	6.73498	29.9497	6.3235	27.337	5.58536	8.10645	12.9151	1.70257	3.15483	9.23591	5.65701	5.02625	4.58711	6.91193	0.161643	3.15081	7.57242	0.138561	2.52234	5.16249	6.57799	2.3136
PH02Gene04630	0.119436	0.055103	0.13408	0.126234	0.870082	0.195428	6.80228	0.761034	9.15269	6.29838	0.589954	0.082347	8.70398	5.99657	1.93853	1.65672	18.8913	4.87895	0.433649	1.90067	4.18368	0.435357	0.461123	3.82769	7.07698	0.09461
PH02Gene04629	17.0016	26.5121	10.9792	13.6002	40.539	13.5128	8.49662	8.91176	7.67914	18.1753	5.23488	11.743	5.18038	30.6493	4.8319	4.5882	27.6911	26.4436	0.845451	2.2692	19.5191	2.35092	14.1426	2.84546	8.58483	2.05882
PH02Gene06795	17.6055	6.18587	1.12191	4.46926	3.8248	4.01077	2.87445	39.0064	2.01738	2.96962	48.1629	5.58888	9.16115	3.25249	7.96237	19.7644	12.7711	3.08985	1.19161	39.8529	2.19514	1.72301	1.77093	4.33761	1.09855	1.27045
PH02Gene42984	11.5828	3.29415	0.141705	0.826418	0	1.37227	0	0.323316	0	0	4.65493	0.032075	0.605374	0	1.27249	0.640856	2.79158	0	0	4.90813	0	0	0	0.033044	0	0
PH02Gene42960	4.39988	5.53327	5.60678	5.87925	0.144792	2.89947	4.81029	2.77481	2.39301	4.04623	5.9871	1.36611	7.50021	4.56073	9.75896	19.4497	2.03103	6.80731	0.422135	2.00474	6.11842	1.12423	0.324	1.12431	0.882968	3.17826
PH02Gene28903	86.7846	32.3173	2.61345	14.4582	0.366758	12.6946	5.96831	94.3791	7.68218	0.567224	126.081	6.86814	32.9728	1.22066	26.5281	56.9345	22.6615	1.58957	0.0484283	48.3044	2.92575	0.162418	0.190579	15.6938	0.297195	0.139767
PH02Gene12618	19.817	30.3093	20.9489	24.3015	7.38252	28.2432	0.382706	0	1.53138	1.33899	0.437669	12.0498	0.780426	1.93636	0.227786	0	0.042396	2.27284	2.77559	0.223428	0.485042	1.71999	8.61533	0.081565	0.525462	27.6236
PH02Gene12617	0.016496	0.017321	0.015902	0	0	0	0.016593	0	70.8468	0	0	0	0.996771	0	0	0	5.3592	0	0	0	0	0.017432	0	0	0	0
PH02Gene12616	10.7807	15.691	1.32919	2.18347	3.53838	6.82496	0.459063	0.346568	31.4991	15.9978	0.385844	0.210275	5.86297	14.7764	1.08333	1.54453	0.492812	11.6317	0.144053	3.26197	0.326843	0.161301	0.100063	2.92196	0.171796	0.053185
PH02Gene42850	124.107	2.62379	0.0990888	16.9878	2.0146	1.19443	8.29561	437.714	0.215991	2.7283	570.973	12.8307	63.649	3.30206	86.4936	280.575	31.7713	3.36626	0.123086	364.008	6.25033	0.11693	0.065968	60.9355	2.31829	0.179598
PH02Gene32193	35.4523	11.4021	1.16429	2.78978	0	12.8376	0	0	2.58607	0	0.507253	0	0.058012	0	0.162401	0	0.303104	0	0	0.2417	0	0	0	0	0	0
PH02Gene02696	14.5712	0.037827	0.037046	0.148444	0	0.126478	0	0.019683	0.412664	0	1.43809	0.062628	0.087148	0	6.52787	8.5507	2.18806	0	0	0.904381	0.055465	0	0	0.217922	0	0
PH02Gene42027	26.654	27.6182	17.4168	22.3245	3.92589	29.9995	3.44011	0.472121	3.71264	7.50966	0.895086	4.82651	15.2124	7.50085	1.31377	1.70975	8.29462	7.22284	0.226979	0.51275	2.48199	0.363104	1.0876	0.090372	0.113198	4.81491
PH02Gene48085	11.5426	8.20819	0.80705	1.25557	0.37193	6.33345	0.440053	7.96536	0.133096	0.255597	4.85311	1.76004	0.935663	0.163195	2.72029	4.67438	0	0.141253	0	5.46236	0.563966	0.28779	0.681024	1.48798	0.27516	1.26478
PH02Gene51351	20.9731	8.64627	1.34277	9.07494	14.9202	1.51282	1.34405	20.5326	7.53157	0.734704	39.8312	63.5608	15.8514	1.62539	7.31539	22.3964	5.77675	1.37972	10.7535	19.4304	1.20417	1.0812	33.5432	3.74557	0.822193	17.7808
PH02Gene28140	2.58304	1.42196	7.52651	9.5683	2.38071	5.7706	9.68466	0.160022	3.26731	12.5292	0.101858	0.706521	7.53092	17.4431	9.42025	1.15947	7.73781	21.498	0.487874	0	10.12	0.336881	0.142586	0.030316	0.106413	0.679076
PH02Gene28141	0.702935	0.164307	0.024152	0.355537	0.102282	0.120596	0	1.71683	19.284	0	1.08263	0.853209	3.95604	0	0.490775	1.44353	1.88409	0	1.99305	0.359383	0	2.25354	1.79121	0	0	18.2201
PH02Gene25511	5.3146	1.29458	0.067237	0.985508	0.164047	1.10398	0.150906	6.47479	0.038291	0.143051	9.86873	0.48103	0.492166	0.197656	2.96691	5.62743	0.263322	0.325057	0.030673	6.63786	0.073856	0.051005	0.093924	1.20794	0.079465	0.167896
PH02Gene20528	79.0058	49.5537	5.29683	11.9281	0.129574	18.2091	2.86187	22.8062	24.5676	0.980474	143.317	0.956308	2.77023	0.931604	30.4511	60.3595	8.21093	0.979985	0.067909	12.6441	1.2588	0.235048	0	8.27035	0.078212	0
PH02Gene01698	0	0	0	0.0199783	0	0	0.010097	0.0228934	14.8683	0.0214833	0	0.0470464	2.27507	0	0.0149226	0.0112789	0.970905	0	0.396216	1.52304	0	0.0153281	0	0.354008	0.0874817	0.0183716
PH02Gene01704	62.1297	52.9842	43.4815	71.5464	94.6303	30.1216	231.985	72.0935	80.4066	33.3203	104.413	232.407	36.4142	56.2022	408.191	178.939	8.98639	135.027	630.09	71.1452	136.012	505.299	460.035	158.764	35.5997	1045.34
PH02Gene48149	28.9367	9.98867	5.31822	10.3036	126.664	10.2165	15.8466	79.8339	20.8919	17.4394	53.1278	86.0783	17.1359	32.4647	29.5809	45.3633	9.35689	27.3877	15.6587	14.3292	16.737	27.8256	46.5368	7.72558	2.79095	27.7518
PH02Gene05862	0	0.782688	0	0	0	0	0	0	0	0.03891	0	0	0	0	0	0	0	0.091151	0	0	0	0	0	0	0	0
PH02Gene11141	3.03933	0.541736	0.18531	0.421229	0.144745	0.141121	0.206906	1.08124	0.024707	0.121428	2.70717	0.201501	0.2055	0.27261	0.923167	1.07841	0.191307	0.098397	0	6.89676	0.222485	0.060006	0	0.687491	0.121812	0.072638
PH02Gene12620	0.195006	0.16169	0.069016	0	0	0.056591	0.463733	1.60053	0.880763	0.293665	0.706128	0.321548	1.26914	0.463003	0.718538	1.32068	3.69212	0.261945	0	0.221996	0.401003	0.07912	0.193535	0.338843	0	0
PH02Gene25609	0.2178	0.132863	0.7126	0.491354	0	0.133907	0.108195	0	0	0.022876	0.037577	0	0	0	0	0.111622	0.012347	0.01523	0.022553	0	0.019597	0	0	0	0.054247	0
PH02Gene03651	0	0	0	0.020854	0	0	0.016223	0	1.10038	0	0	0.14003	6.3279	0.044315	0	0	4.30908	0	0	0.091695	0.045146	0	0	0	0.457876	0
COMT	bud_Rhizhome	lower_bud_shoot_3m	Shoot_middle_bud_3m	top_bud_shoot_3m	leaf	leaf_sheath	Shoot_lower_0.2m	Shoot_lower_1.5m	Shoot_lower_3m	Shoot_lower_6.7m	Shoot_middle0.2m	Shoot_middle1.5m	Shoot_middle_3m	Shoot_middle6.7m	top_shoot_0.2m	top_shoot_1.5m	top_shoot_3m	top_shoot_6.7m	rhizome	Root_lateral root	Root_rhizhome	root on shoot_0.1cm	root on shoot_0.5cm	root on shoot_10cm	root on shoot_2cm	Sheath_sheet
PH02Gene02562	2145.57	2122.03	466.938	661.127	14.0374	723.625	162.142	805.22	101.643	60.6799	3078.43	260.262	281.658	56.24	2454.93	1634.22	115.25	100.762	20.0978	3542.11	105.088	65.2837	40.6477	2651.58	39.323	43.5768
PH02Gene05362	520.424	503.804	109.791	180.16	5.75159	278.544	56.0186	421.677	65.7763	6.20882	1317.4	42.5056	105.266	7.6715	785.86	612.517	36.0131	7.15466	19.5119	831.553	27.7436	15.471	11.634	502.658	20.8801	15.7006
PH02Gene10900	4.27993	0.226708	5.37572	7.68848	35.4691	5.08364	25.4239	8.0047	50.3404	21.6949	7.07879	16.2591	49.4132	28.8002	14.5006	9.2676	13.1885	26.0068	38.5497	16.6966	16.0717	37.7141	36.4833	19.0676	16.762	33.4747
CSE	bud_Rhizhome	lower_bud_shoot_3m	Shoot_middle_bud_3m	top_bud_shoot_3m	leaf	leaf_sheath	Shoot_lower_0.2m	Shoot_lower_1.5m	Shoot_lower_3m	Shoot_lower_6.7m	Shoot_middle0.2m	Shoot_middle1.5m	Shoot_middle_3m	Shoot_middle6.7m	top_shoot_0.2m	top_shoot_1.5m	top_shoot_3m	top_shoot_6.7m	rhizome	Root_lateral root	Root_rhizhome	root on shoot_0.1cm	root on shoot_0.5cm	root on shoot_10cm	root on shoot_2cm	Sheath_sheet
PH02Gene40519	6.65326	9.25745	6.82368	9.60409	4.06842	15.5643	4.57139	3.62212	8.4915	4.85781	5.13317	8.7923	6.10566	4.79495	4.23396	3.38113	1.23251	5.24178	7.04782	7.75884	4.68172	8.64256	8.54755	7.29004	8.51348	5.76475
PH02Gene49207	0.017828	0.056536	0.026979	0.049747	0.137112	0.054006	0.205263	0	0	9.71447	0	0	0	11.0094	0.034136	0	0.047143	6.67398	0	0	0.324347	0.018966	0.018512	0.129779	0.169665	0.035515
PH02Gene34362	10.0358	19.4808	8.41604	4.91395	0.375024	3.90969	0.0176624	1.27416	69.0355	0.135417	1.20801	1.93024	76.698	0.137611	0.608527	4.92553	40.6322	0.355217	79.2455	1.63048	0.0453794	24.4948	6.40009	0.195721	0.0416688	89.9868
PH02Gene14766	9.31871	3.74231	3.00428	5.28847	1.44008	6.90142	3.64891	2.15225	3.95315	1.13323	1.6299	0.989748	2.34964	1.65524	4.10234	4.84641	1.07086	2.39333	6.0289	1.67641	2.05791	2.28076	2.79852	0.854571	1.00271	27.7955
PH02Gene39642	0	0.115685	0	0	0	0	0.060724	0	0	1.23788	0.214484	0.040873	0	2.24875	0	0.195619	0	0.927398	0	0.634406	0.484023	0	0	0.162727	0.288293	0
PH02Gene47439	6.13014	4.45973	4.48527	6.82665	5.4095	4.90147	8.22814	4.98312	5.72014	12.4404	5.82069	4.77014	9.3021	11.1208	5.97006	5.18872	10.6534	11.1836	9.44517	6.77868	8.46657	9.28335	8.2942	6.10799	9.9728	8.27379
PH02Gene38043	4.20584	2.42121	1.87955	2.61599	0.29851	2.63149	1.02127	0.345176	0.255156	9.08741	0.396313	0.564355	1.17356	10.3966	0.35982	0.104032	1.33029	11.9549	1.23082	0.342047	0.67105	0.593837	0.500546	0.987954	0.809578	0.949683
PH02Gene08087	6.82668	2.79891	3.53204	5.9173	3.52169	4.65348	0.968158	1.86013	4.53206	2.27372	1.21011	2.60497	5.69482	1.6107	0.530584	1.30052	1.00131	1.84947	0.968922	1.13821	1.67503	1.49953	1.94512	0.441764	1.62698	1.49134
PH02Gene20021	7.19543	6.60093	7.12202	11.7702	11.6333	12.3578	9.52959	4.98494	12.4073	11.881	3.99266	8.29416	4.72497	9.85819	4.173	2.79283	3.40371	9.91859	4.08409	5.68701	9.41787	6.12141	6.81812	6.31929	13.8551	5.80816
PH02Gene23808	0	0.046632	0	0	0	0	0	0	0.43079	0	0	0	0	0	0	0	0.896856	0	0	0	0	0	0	0	0	0
PH02Gene44160	1.76506	1.15077	0.508153	0.448981	0	1.48649	0	2.29388	0.209694	0	0.792599	0.334829	4.26327	0	0.217899	0.75092	0.305392	0	0	0.018441	0	0	0.018633	0.269714	0	0.420173
F5H	bud_Rhizhome	lower_bud_shoot_3m	Shoot_middle_bud_3m	top_bud_shoot_3m	leaf	leaf_sheath	Shoot_lower_0.2m	Shoot_lower_1.5m	Shoot_lower_3m	Shoot_lower_6.7m	Shoot_middle0.2m	Shoot_middle1.5m	Shoot_middle_3m	Shoot_middle6.7m	top_shoot_0.2m	top_shoot_1.5m	top_shoot_3m	top_shoot_6.7m	rhizome	Root_lateral root	Root_rhizhome	root on shoot_0.1cm	root on shoot_0.5cm	root on shoot_10cm	root on shoot_2cm	Sheath_sheet
PH02Gene22138	0.068189	0	0	0	0	0	0.038238	0	12.0635	0.136287	0	0	8.55433	0.185358	0.411293	0.636994	1.52755	0.318382	0.104026	1.66338	0.03646	0.414026	0.414273	0.332183	0	0.376998
PH02Gene30639	4.7825	2.4991	0.0343907	0.590166	0.323784	0.810164	0.0996737	8.70782	0.800201	0.283336	9.12679	1.90378	2.96879	0.89349	5.67001	6.12845	0.822496	1.61363	0.0234295	0.785659	0.0428038	0.0508021	1.2405	10.0466	0.00780333	0.510038
PH02Gene08873	4.39182	0	20.2498	15.3593	0	0.672203	0	6.75795	0	1.02357	1.79906	1.9535	0	0.407622	2.23979	3.85674	0	0.543732	17.9794	0.030852	0	9.12248	3.74454	0.316551	0	1.19927
PH02Gene38755	22.8432	0	95.3278	77.1418	0	3.20946	0	0	0.035468	6.5727	0	0.12012	0.144923	13.4155	0	0.351366	0	2.87898	0.124142	0.047956	0.012544	0.045242	0.088404	0.018489	0.017084	0.087373
PH02Gene24107	18.1656	22.6187	2.82801	3.33586	0.377383	6.03432	3.96086	5.70715	7.0401	1.55409	15.6053	7.26951	21.0455	2.26801	9.45428	8.41899	5.54085	2.99689	20.0386	4.20927	4.63243	30.579	21.92	2.82111	2.09345	28.9862
PH02Gene30039	25.5555	6.22696	0.43045	5.16976	0.054194	2.70572	0	59.1215	0.048311	0.155657	86.7192	4.248	2.86946	0.224947	7.89183	18.5547	4.21864	0.111499	0.05158	0	0.020475	0	0.020321	0	0.033018	0.328581
PH02Gene50047	10.8429	3.12056	0.114679	2.14298	0.0218343	1.44281	0	27.3222	0.148655	0.446947	31.5415	1.9064	2.36505	1.18662	3.36613	9.12593	2.43447	0.816139	0	0	0	0	0	0	0	0.0191516
PH02Gene08874	0.0171475	0.0079377	0.0718684	0.0236352	0.0535626	0.0100461	0.00470836	4.94077	0.0537872	0.010933	0.726743	4.70073	0.00196777	0.00546417	1.7633	2.45483	0.00234559	0.020059	40.4751	0.168388	0.00782908	25.9458	14.7741	1.13543	0.00310658	1.00161
PH02Gene32086	1.13401	0	0	0.104216	0.089763	0.041213	0	1.5143	0.10967	0.5985	2.23642	0.149291	2.82414	1.07067	0.079731	0.831895	2.21343	0.57071	0	0	0	0	0	0	0	0
PH02Gene38343	0	0	0	0.101302	0.200296	0	0	0	0.035518	0.091878	0.131048	0	0.617321	0.832533	0.094496	0	0.482739	0.444286	0	0	0	0	0	0	0.04605	0
PH02Gene29718	1.88683	1.58524	0.651657	0.21975	0.067985	1.43488	0	4.10276	36.3377	0	3.65385	0.43486	7.0422	0	0.910409	2.93043	50.2946	0.028563	21.2585	4.26995	0	8.93216	2.46687	0.656114	0	27.9546
PH02Gene10864	0	0	0	0	0.015434	0	0	0	12.9107	0.014398	0	0	5.0459	0	0	0	7.14462	0.014612	0	0	0	0	0	0	0	0
PH02Gene18881	2.69811	0	0.928898	3.86259	7.97351	10.4627	2.19972	0.0991533	13.12	22.7355	0.719975	0.196699	97.7025	19.2635	6.94661	0.080547	278.941	42.8243	0.0231262	0.0940379	0.535501	0.380548	0.505451	1.44695	0.173706	0
PH02Gene18882	8.5657	5.46607	1.87095	4.64776	6.84928	4.45038	9.25441	2.01769	25.0735	4.01113	3.85357	11.4455	10.4416	3.21069	10.0217	3.42717	7.22702	5.16484	39.6026	1.7242	6.92804	30.3876	11.3312	1.2261	4.76446	33.6813
PH02Gene04946	0	0.181582	0	0	0	0	0	0	0	0	0.156106	0	0	0	0	0	0	0	0	0	0	0	0	0	0	0
PH02Gene14051	0	0.018233	0	0	0	0	0	0	0	0	0	0	0	0	0	0	0	0	0	0	0	0.019661	0	0	0	0.020741
PH02Gene15790	0.708247	0	0.235464	3.4868	0.015975	1.26059	0	0.102871	0.01426	0.014902	0	0	0.385981	0.021746	0	0	3.82849	0	0	0	0	0	0	0	0	0.033588
PH02Gene39460	1.68134	0.398158	1.31186	0.555563	0.095985	0.139855	2.16541	0.345266	0.062601	1.09683	0.861746	0.28003	0.389911	0.964356	1.11054	0.478064	1.96708	0.780992	0	2.13376	2.21328	0.081452	0.016549	0.739389	0.376929	0.091987
PH02Gene41927	0.936471	0.188136	0.016354	0	0	0.047517	0	0	0	0	0	0	0	0	0	0	0	0	0	0	0	0	0	0	0	0
PH02Gene45159	0.847909	0.09478	0	0	0	0	0	0	0	0	0	0	0.434559	0	0	0	0	0	0	0	0	0	0.025022	0	0	0
PH02Gene46040	0	0	0	0	0	0	0	0.034971	0	0	0	0	0.061929	0	0	0	0	0	0	0	0	0	0	0	0	0
PH02Gene46041	0.029629	0	0	0	0.008979	0.03447	0	0	0	0	0	0.165901	0	0	0	0	0	0	0	0	0	0	0.01773	0	0	0
PH02Gene49877	0	0	0.187988	0.367698	0	0.038947	0	0	0	0	0	0	0.022365	0	0	0.030719	0.074033	0	0.042394	0	0	0.045778	0	0	0	0
PH02Gene49975	0.312767	0.016724	0.016324	0	0	0	0.071028	0	0	0	0	0	0	0	0	0	0	0.016714	0	0	0	0	0	0	0	0
PH02Gene36674	13.6759	0.591345	0.012713	1.11557	0	0.505006	0.231617	3.40048	0	0.198459	5.06369	0.159776	0.741755	0.068709	1.17673	8.02803	0.051052	0.03276	0.013121	44.1978	0.084641	0	0	11.5005	0.097728	0
PH02Gene36673	0.873472	0	0	1.0364	0.01424	0.092376	0	23.7885	12.849	0	25.0708	0.575537	1.78479	0.025845	1.66252	11.7433	0.147494	0	0.276003	68.5173	0	0.487845	1.15147	6.11019	0	2.05816
PH02Gene36670	6.98294	3.97661	0.48078	0.593622	0.068733	0.860568	0	0	0	0	0	0.099965	0.022204	0	0	0	0	0.014311	0	0.049291	0	0	0	0	0	0.031784
PH02Gene21400	21.6451	0.083011	0.031102	5.98901	0.181883	0.255915	0.152013	79.4199	3.46796	0	160.748	14.1884	29.6236	0.018267	33.9845	101.045	7.44953	0.138807	3.55336	75.0156	0.069435	4.27126	2.16151	4.24582	0.055003	34.7283
PH02Gene22703	0.392157	0.116856	0.439631	0.334636	0.03555	0.605651	0.016572	0	0.019553	0.355075	0	0	0.036165	0.349896	0.107779	0	0	0.267049	0	0	0	0	0	0	0	0
PH02Gene02036	0.0334169	0.212968	0.236636	0.158838	0.49911	0.0822971	0.141661	0.143709	0.101431	0.0928723	0.253572	1.92307	0.139491	0.0697206	0.704934	0.134528	0.0699133	0.0506006	0.409375	0.237718	0.121237	0.587993	2.32038	1.58563	0.0433107	0.311596
PH02Gene44442	0.206827	0.073594	0.136216	0.03216	0	0.25037	0	0.017874	0	0	0.082267	0	0	0	1.03107	0.194874	0.485954	0	0	0.383754	0.051344	0	0	1.95476	0	0
PH02Gene34078	4.7825	2.4991	0.0343907	0.590166	0.323784	0.810164	0.0996737	8.70782	0.800201	0.283336	9.12679	1.90378	2.96879	0.89349	5.67001	6.12845	0.822496	1.61363	0.0234295	0.785659	0.0428038	0.0508021	1.2405	10.0466	0.00780333	0.510038
PH02Gene02035	0.0334169	0.212968	0.236636	0.158838	0.49911	0.0822971	0.141661	0.143709	0.101431	0.0928723	0.253572	1.92307	0.139491	0.0697206	0.704934	0.134528	0.0699133	0.0506006	0.409375	0.237718	0.121237	0.587993	2.32038	1.58563	0.0433107	0.311596
HCT	bud_Rhizhome	lower_bud_shoot_3m	Shoot_middle_bud_3m	top_bud_shoot_3m	leaf	leaf_sheath	Shoot_lower_0.2m	Shoot_lower_1.5m	Shoot_lower_3m	Shoot_lower_6.7m	Shoot_middle0.2m	Shoot_middle1.5m	Shoot_middle_3m	Shoot_middle6.7m	top_shoot_0.2m	top_shoot_1.5m	top_shoot_3m	top_shoot_6.7m	rhizome	Root_lateral root	Root_rhizhome	root on shoot_0.1cm	root on shoot_0.5cm	root on shoot_10cm	root on shoot_2cm	Sheath_sheet
PH02Gene24931	10.5541	5.99697	7.60905	10.3821	4.76058	6.95489	7.25253	3.29253	25.4865	10.5167	1.77581	7.23254	15.1037	12.4335	4.92198	13.9435	17.3463	14.1577	0.46385	3.77512	4.97612	2.51952	9.52222	2.22611	2.0654	14.8347
PH02Gene25268	3.41573	2.84767	2.921	3.81406	1.26998	4.13013	2.3819	3.15185	3.73479	2.24161	1.66502	1.20203	0.607867	3.63639	3.69346	2.73013	0.386976	3.5435	0.123933	8.39948	1.67282	0.298422	1.92436	18.2863	0.888788	0.446601
PH02Gene40116	7.71549	0.02397	20.1681	31.3237	4.28339	20.0779	9.47479	0.012451	0.045442	17.8457	0	0.033615	0.287352	20.8873	0.588978	0.012586	0.042383	14.2616	0.024352	0.011989	23.8659	0.060687	0.006057	1.59327	38.503	0.027005
PH02Gene25559	4.1977	1.57851	7.2905	10.2769	0.961338	6.44804	1.56925	0.857735	0.456426	1.50278	0.457522	1.29868	0.742726	1.26543	1.42876	1.2138	0.340385	1.07555	0.417888	0	2.67274	0.670714	0.765604	0.270647	0.951353	0.723701
PH02Gene47111	7.36613	11.3048	9.12631	2.52948	1.7478	6.26312	0.413501	20.6511	108.748	2.14884	10.1611	1.90729	26.2881	5.24601	8.29125	13.9688	90.1856	9.59261	50.713	2.44254	0.192136	40.2572	37.6857	2.94652	0.348463	51.8603
PH02Gene48782	0.309619	0.0209409	0	0	0	0	0.052858	0.0878853	2.78616	0	0.127346	0.029862	0	0.0612403	0.0887115	0.927554	0	0	2.38928	0.0863047	0.0646965	0.772866	0.112862	0.0262648	0	4.09166
PH02Gene48286	0.131344	0.01232	0	0.143744	0	0	0.0669332	0.0909133	3.33262	0	0.102528	0.243074	0	0	0.511567	0.685514	0.0389785	0	8.28612	0.154757	0	4.49709	0.189648	0.0749859	0.0215817	7.97665
PH02Gene20074	0.096637	0.017007	0.0498	0.366462	0.071814	0	0.193981	1.2371	0.221851	0.7249	8.02584	0.157153	0.139533	0.75447	2.069	1.54563	0.046632	2.39079	0.361627	52.9839	0.109166	0.516209	0.092164	21.899	0.055209	0.05662
PH02Gene19041	0.334559	0.687756	0.442129	0.526566	8.65714	0.535268	1.62013	0.326089	1.50269	2.77169	0.055907	7.273	1.3629	3.98458	1.05655	0.131132	8.36873	5.43187	2.40603	0.521571	1.13609	2.71705	1.89605	0.955596	0.611831	4.79005
PH02Gene19042	0	0	0	0	0	0	0	0	0	0.251728	0	0	0	0.182858	0	0.018564	62.5341	0.70942	0.091627	0	0.191434	0.447692	0	0	0.019816	0
PH02Gene01736	0.254093	0	0	0	0	0	0	0	0	0	0	0	0	0	0	0	0	0	0	0	0	0	0	0	0	0
PH02Gene18490	1.34116	0	0	0.052181	0	0.105678	0	0	0	0.120766	0.280511	0	0	0.124898	0.340433	0.415732	1.06865	0.066359	0	0.703954	0	0	0	0.108792	0.230849	0
PH02Gene24932	0	0	0	0	0	0	0	0	0	0	0	0	0.175145	0	0	0	0	0	0	0	0	0	0	0	0	0
PH02Gene32168	0	0	0	0	0	0	0	0	0	0	0	0	0.451823	0	0	0	0	0	0	0.252195	0	0	0	0.124492	0	0
PH02Gene25625	36.9033	37.6025	15.3452	12.9317	0.544884	14.1346	2.15626	27.0316	5.0222	0.70817	41.0962	30.2707	1.40849	1.23687	22.2989	48.2444	9.73251	3.17471	1.98772	32.6516	0.784186	5.56692	3.73337	13.3442	0.304595	3.17614
PH02Gene06655	107.51	46.4631	18.4764	32.4249	18.8754	22.0792	28.3586	108.127	4.08108	12.2561	218.602	21.1982	26.5675	17.1608	69.1531	91.1234	22.6871	14.9884	1.71578	244.197	25.0114	7.14042	9.30438	76.246	10.704	3.55534
PH02Gene48963	54.826	27.6382	11.7917	12.5718	0.472359	9.67784	6.95979	20.7191	12.9255	3.10834	64.1023	20.252	3.02717	2.91016	35.0648	84.3874	17.988	5.32878	2.82642	63.9895	2.22348	9.20821	4.7227	18.1613	1.08445	3.07708
PH02Gene11151	0.670478	1.1125	0.397872	0.317256	0	0.991483	0.146814	0.052612	0.840567	0	0.248203	6.62794	0	0.081391	0.574082	2.08539	0	0.238016	0.144944	0.082648	0.033886	3.8971	0.135877	0.034131	0	0.48253
PH02Gene11147	0	0	0	0	0.022202	0	0	0	0	0	0	0	0	0	0	0	0	0	0.322852	0	0	0.21979	0.052346	0	0	0
PH02Gene24448	67.2475	13.3087	4.5932	8.97971	2.37531	11.8099	2.17978	18.7956	61.8319	4.64619	30.0924	3.98246	6.62531	3.82557	6.80187	12.0895	6.79178	3.50063	0.853307	131.005	2.39512	2.80044	1.93571	32.3434	2.76952	2.88152
PH02Gene02691	0.184184	0.203494	0.031788	0	0.033922	0	0.604727	0.050668	13.3022	0.687667	0.400878	1.24026	1.72455	0.964274	0.166701	0.580916	25.9837	1.90551	0.203421	0.088247	0.18436	4.28035	0.663057	0	0	0.01789
PAL	bud_Rhizhome	lower_bud_shoot_3m	Shoot_middle_bud_3m	top_bud_shoot_3m	leaf	leaf_sheath	Shoot_lower_0.2m	Shoot_lower_1.5m	Shoot_lower_3m	Shoot_lower_6.7m	Shoot_middle0.2m	Shoot_middle1.5m	Shoot_middle_3m	Shoot_middle6.7m	top_shoot_0.2m	top_shoot_1.5m	top_shoot_3m	top_shoot_6.7m	rhizome	Root_lateral root	Root_rhizhome	root on shoot_0.1cm	root on shoot_0.5cm	root on shoot_10cm	root on shoot_2cm	Sheath_sheet
PH02Gene40450	23.4778	22.3755	13.913	6.58087	11.7128	25.4703	0.282523	10.4699	23.9131	1.1785	26.4959	3.2618	1.98133	1.17618	9.42311	9.50335	5.07175	3.33042	366.512	15.4663	0.577062	133.018	33.6262	11.4267	0.382291	67.4372
PH02Gene47460	3.04333	1.29423	0.24031	0.576748	0.086241	0.585324	0	6.2386	0.050794	0	4.50882	0.891476	0.339627	0	1.37788	1.06522	0.188138	0.05387	0	2.49203	0	0.24237	0.638585	0.967565	0	0.350842
PH02Gene27012	4.28718	3.5115	2.28043	2.08995	0	0.731833	0.978534	0.456058	37.3571	0.377629	0.657581	4.0225	0.225631	0.309421	0.407371	1.19124	2.62824	1.23219	0.211676	0.070912	0.297603	5.44654	0.335174	1.54492	0.036807	0.053942
PH02Gene27016	4314.08	1460.53	482.494	669.138	82.6132	719.476	86.8898	9112.04	72.1936	33.0865	5405.64	1114.91	406.789	41.7883	1903.99	2141.6	261.867	57.9624	217.93	2928.11	58.4761	416.318	656.857	1477.08	49.6255	348.073
PH02Gene23137	8.12099	38.5151	22.6759	16.4216	0.021651	6.18393	0.630913	0.075395	16.4698	0.763067	0.306783	0.039502	17.5665	1.01766	0.852023	1.31055	55.9113	1.91393	0.021014	2.46792	0.160964	0.894457	0.422235	5.82962	0.428373	0.086574
PH02Gene23138	678.777	178.415	58.7325	124.315	8.15017	67.6276	22.9341	129.407	5.55376	6.99264	656.376	66.9787	55.0315	9.8308	383.447	248.435	97.7012	13.7438	1.24069	1323.92	12.1299	4.00703	8.33142	565.835	7.50195	0.36104
PH02Gene08453	843.542	154.384	114.321	97.9209	1.94836	137.508	6.99632	279.724	0.580067	3.39251	467.631	96.3364	11.9754	6.50137	251.423	154.247	4.50718	6.62356	0.368845	299.5	5.62147	2.1276	13.1342	206.482	4.95452	0.530128
PH02Gene08452	20.5623	13.243	27.6532	8.02564	0.021647	11.4313	0.063907	0.064486	0.863872	0.101545	0.230828	0.068587	32.2711	0.044631	0.556162	3.2561	81.4233	0.067502	0.051577	0.220915	0.071551	0.125242	0	0.268766	0.212112	0.023064
PH02Gene30508	2941.71	1233.89	315.191	410.565	32.9173	671.384	15.3153	6759.47	217.716	6.54603	4094.82	933.199	190.196	8.72353	1488.45	1368.46	246.11	11.9262	168.14	3823.17	10.2224	226.62	181.876	1038.76	8.18117	103.071
PH02Gene30509	215.575	147.319	71.7054	61.449	17.4366	87.0857	24.5967	44.0309	121.467	7.29711	67.4187	161.633	131.544	8.30459	80.1053	103.823	96.3661	23.4766	420.982	46.4026	10.6544	328.315	293.309	39.1959	1.50628	294.959
PH02Gene30511	15.9101	10.2725	3.1274	1.06223	0.384652	10.2214	75.6943	22.9039	57.1121	2.0096	17.8523	2.07203	10.475	11.4187	9.80992	26.1911	12.5851	14.2452	0.04198	22.4697	98.2514	3.59999	0.883551	10.5205	6.56256	0.023277
PH02Gene40449	1.30928	6.39895	6.34018	4.61257	0.010413	0.798999	2.94452	0	38.0171	1.80544	2.86866	6.79068	0.06578	2.40292	1.99578	2.75238	0.08447	4.73885	0.056148	0.019422	0.728287	10.6612	2.17753	0.892288	0	0.00821
PH02Gene27013	7.27844	6.29416	3.66701	3.34376	0	5.68541	1.0478	1.08	55.3642	0.423566	1.91416	5.5282	0.618771	0.465398	1.02797	2.45766	4.99738	1.71785	14.819	2.2458	0.330898	14.7537	2.09224	4.10815	0.059049	4.17054
PH02Gene27014	1.50363	8.03709	7.79415	5.75422	0	0.883197	3.08229	0.0836958	41.5163	2.0245	0.907074	4.6366	0.0578491	3.22879	2.52137	3.20533	0.285641	5.4864	0.0477436	0	0.845072	12.1311	0.647082	1.01352	0.019229	0
