# Supplementary material for: Homo- and Hetero-Dimers of CAD Enzymes Regulate Lignification and Abiotic Stress Response in Moso Bamboo
Source: Int J Mol Sci. 2021 Nov 29;22(23):12917. doi: 10.3390/ijms222312917 (PMC8657895; doi:10.3390/ijms222312917)
Supplement: Supplementary file 1 [file ijms-22-12917-s001.zip › Supplementary files/Table S4.xlsx]

## Sheet: Sheet1
Table S4: PCC values of PheCAD genes with other lignin biosynthesis enzymes
Positive correlation				negative correlation
Source	target	value		Source	target	value
PH02Gene00825	PH02Gene44264	0.767196		PH02Gene00825	PH02Gene09462	-0.523036
PH02Gene01698	PH02Gene22533	0.874368		PH02Gene02562	PH02Gene24626	-0.540269
PH02Gene01698	PH02Gene27012	0.954254		PH02Gene05362	PH02Gene24626	-0.532225
PH02Gene01698	PH02Gene27013	0.913682		PH02Gene08087	PH02Gene48202	-0.53188
PH02Gene01698	PH02Gene27014	0.888521		PH02Gene09462	PH02Gene30509	-0.61036
PH02Gene01698	PH02Gene31552	0.978038		PH02Gene09462	PH02Gene03697	-0.568533
PH02Gene01698	PH02Gene40449	0.892602		PH02Gene10900	PH02Gene25625	-0.665386
PH02Gene01704	PH02Gene30509	0.725048		PH02Gene10900	PH02Gene04631	-0.644909
PH02Gene01704	PH02Gene48286	0.825051		PH02Gene10900	PH02Gene48085	-0.624341
PH02Gene01704	PH02Gene48782	0.721907		PH02Gene10900	PH02Gene12695	-0.603233
PH02Gene02562	PH02Gene03697	0.757165		PH02Gene10900	PH02Gene34989	-0.587862
PH02Gene02562	PH02Gene06655	0.866444		PH02Gene10900	PH02Gene08453	-0.548496
PH02Gene02562	PH02Gene08453	0.730746		PH02Gene10900	PH02Gene22501	-0.542073
PH02Gene02562	PH02Gene11141	0.772904		PH02Gene10900	PH02Gene05362	-0.513271
PH02Gene02562	PH02Gene17241	0.945907		PH02Gene10900	PH02Gene02562	-0.510956
PH02Gene02562	PH02Gene22501	0.751865		PH02Gene10900	PH02Gene17241	-0.508659
PH02Gene02562	PH02Gene23138	0.901969		PH02Gene13789	PH02Gene00825	-0.584456
PH02Gene02562	PH02Gene25511	0.771029		PH02Gene20021	PH02Gene22501	-0.580032
PH02Gene02562	PH02Gene25625	0.762874		PH02Gene20021	PH02Gene03697	-0.562215
PH02Gene02562	PH02Gene34989	0.868033		PH02Gene20021	PH02Gene14706	-0.530549
PH02Gene02562	PH02Gene48963	0.798435		PH02Gene20021	PH02Gene48963	-0.519475
PH02Gene02696	PH02Gene04447	0.702419		PH02Gene20021	PH02Gene30639	-0.50164
PH02Gene02696	PH02Gene08453	0.738257		PH02Gene22501	PH02Gene09462	-0.587784
PH02Gene02696	PH02Gene18490	0.752909		PH02Gene22501	PH02Gene24626	-0.583069
PH02Gene02696	PH02Gene42984	0.7204		PH02Gene24107	PH02Gene09462	-0.561107
PH02Gene03593	PH02Gene27013	0.739722		PH02Gene24107	PH02Gene40116	-0.50788
PH02Gene03593	PH02Gene30509	0.747236		PH02Gene24626	PH02Gene45698	-0.507904
PH02Gene03697	PH02Gene08453	0.76508		PH02Gene25625	PH02Gene09462	-0.549842
PH02Gene03697	PH02Gene23138	0.720911		PH02Gene28140	PH02Gene45698	-0.548503
PH02Gene03793	PH02Gene08452	0.877868		PH02Gene32740	PH02Gene00825	-0.633271
PH02Gene03793	PH02Gene23137	0.791475		PH02Gene32740	PH02Gene30509	-0.514025
PH02Gene04447	PH02Gene03697	0.70857		PH02Gene34989	PH02Gene24626	-0.516739
PH02Gene04630	PH02Gene03793	0.746092		PH02Gene39617	PH02Gene24626	-0.523988
PH02Gene04630	PH02Gene19042	0.731715		PH02Gene40519	PH02Gene12620	-0.56005
PH02Gene04630	PH02Gene24626	0.821683		PH02Gene45698	PH02Gene09462	-0.599292
PH02Gene04631	PH02Gene42739	0.751683		PH02Gene46268	PH02Gene09462	-0.730081
PH02Gene04778	PH02Gene06655	0.871805		PH02Gene46268	PH02Gene28140	-0.596708
PH02Gene04778	PH02Gene06795	0.845104		PH02Gene46268	PH02Gene40116	-0.592089
PH02Gene04778	PH02Gene11141	0.847439		PH02Gene46268	PH02Gene32740	-0.571811
PH02Gene04778	PH02Gene14706	0.835384		PH02Gene46268	PH02Gene04803	-0.554853
PH02Gene04778	PH02Gene17241	0.72785		PH02Gene47439	PH02Gene25625	-0.655265
PH02Gene04778	PH02Gene20074	0.765152		PH02Gene47439	PH02Gene48085	-0.565883
PH02Gene04778	PH02Gene23138	0.785708		PH02Gene47439	PH02Gene12695	-0.535303
PH02Gene04778	PH02Gene25511	0.780973		PH02Gene51351	PH02Gene09462	-0.584564
PH02Gene04778	PH02Gene30508	0.753129
PH02Gene04778	PH02Gene42850	0.812847
PH02Gene05362	PH02Gene02562	0.932002
PH02Gene05362	PH02Gene03697	0.817359
PH02Gene05362	PH02Gene06655	0.889791
PH02Gene05362	PH02Gene06795	0.792517
PH02Gene05362	PH02Gene08453	0.722949
PH02Gene05362	PH02Gene14706	0.726073
PH02Gene05362	PH02Gene17241	0.841253
PH02Gene05362	PH02Gene20528	0.823555
PH02Gene05362	PH02Gene22501	0.827792
PH02Gene05362	PH02Gene23138	0.788691
PH02Gene05362	PH02Gene25511	0.894696
PH02Gene05362	PH02Gene25625	0.797145
PH02Gene05362	PH02Gene28903	0.815576
PH02Gene05362	PH02Gene30508	0.707178
PH02Gene05362	PH02Gene30639	0.725357
PH02Gene05362	PH02Gene34989	0.918935
PH02Gene05362	PH02Gene42850	0.813957
PH02Gene05362	PH02Gene47460	0.707944
PH02Gene05362	PH02Gene48963	0.834994
PH02Gene06655	PH02Gene03697	0.781902
PH02Gene06655	PH02Gene22501	0.758733
PH02Gene06655	PH02Gene23138	0.908324
PH02Gene06655	PH02Gene25625	0.714407
PH02Gene06655	PH02Gene27016	0.701376
PH02Gene06655	PH02Gene30508	0.793627
PH02Gene06655	PH02Gene34989	0.855402
PH02Gene06655	PH02Gene47460	0.749315
PH02Gene06795	PH02Gene03697	0.768493
PH02Gene06795	PH02Gene06655	0.915728
PH02Gene06795	PH02Gene14706	0.90703
PH02Gene06795	PH02Gene22501	0.783839
PH02Gene06795	PH02Gene23138	0.701285
PH02Gene06795	PH02Gene27016	0.841451
PH02Gene06795	PH02Gene30508	0.895517
PH02Gene06795	PH02Gene34989	0.768471
PH02Gene06795	PH02Gene47460	0.873347
PH02Gene06795	PH02Gene48963	0.730751
PH02Gene08087	PH02Gene42027	0.749327
PH02Gene08452	PH02Gene23137	0.85886
PH02Gene08453	PH02Gene23138	0.707913
PH02Gene08453	PH02Gene27016	0.705127
PH02Gene08874	PH02Gene30509	0.78363
PH02Gene08874	PH02Gene40450	0.915837
PH02Gene10900	PH02Gene03593	0.70694
PH02Gene11141	PH02Gene06655	0.904034
PH02Gene11141	PH02Gene06795	0.751228
PH02Gene11141	PH02Gene14706	0.731664
PH02Gene11141	PH02Gene17241	0.857404
PH02Gene11141	PH02Gene20074	0.835572
PH02Gene11141	PH02Gene23138	0.947563
PH02Gene11141	PH02Gene25511	0.741717
PH02Gene11141	PH02Gene34989	0.706365
PH02Gene11141	PH02Gene48963	0.715991
PH02Gene12616	PH02Gene22533	0.70919
PH02Gene12616	PH02Gene27012	0.712302
PH02Gene12616	PH02Gene27014	0.710562
PH02Gene12616	PH02Gene31552	0.724503
PH02Gene12620	PH02Gene03793	0.807998
PH02Gene12620	PH02Gene04630	0.723117
PH02Gene12620	PH02Gene08452	0.731941
PH02Gene12620	PH02Gene19042	0.82536
PH02Gene12695	PH02Gene17241	0.705096
PH02Gene12695	PH02Gene42739	0.805563
PH02Gene13791	PH02Gene04631	0.823493
PH02Gene13791	PH02Gene12618	0.723978
PH02Gene13791	PH02Gene12695	0.732442
PH02Gene13791	PH02Gene32193	0.829246
PH02Gene13791	PH02Gene42027	0.862328
PH02Gene13791	PH02Gene42739	0.91542
PH02Gene14706	PH02Gene03697	0.743438
PH02Gene14706	PH02Gene06655	0.84833
PH02Gene14706	PH02Gene22501	0.760794
PH02Gene14706	PH02Gene23138	0.727013
PH02Gene14706	PH02Gene27016	0.831428
PH02Gene14706	PH02Gene30508	0.874042
PH02Gene14706	PH02Gene47460	0.847807
PH02Gene14766	PH02Gene01704	0.709566
PH02Gene14766	PH02Gene48782	0.753461
PH02Gene15790	PH02Gene03793	0.772133
PH02Gene15790	PH02Gene08452	0.703828
PH02Gene17241	PH02Gene03697	0.771457
PH02Gene17241	PH02Gene06655	0.863912
PH02Gene17241	PH02Gene08453	0.733369
PH02Gene17241	PH02Gene20074	0.756534
PH02Gene17241	PH02Gene23138	0.952796
PH02Gene17241	PH02Gene25625	0.731788
PH02Gene17241	PH02Gene34989	0.806192
PH02Gene17241	PH02Gene48963	0.800598
PH02Gene18881	PH02Gene03793	0.921212
PH02Gene18881	PH02Gene04630	0.819919
PH02Gene18881	PH02Gene08452	0.891151
PH02Gene18881	PH02Gene12620	0.840505
PH02Gene18881	PH02Gene19042	0.933653
PH02Gene18881	PH02Gene23137	0.72283
PH02Gene18882	PH02Gene01704	0.784343
PH02Gene18882	PH02Gene03593	0.889847
PH02Gene18882	PH02Gene08874	0.704762
PH02Gene18882	PH02Gene30509	0.822563
PH02Gene18882	PH02Gene40450	0.767623
PH02Gene18882	PH02Gene48286	0.940683
PH02Gene18882	PH02Gene48782	0.818635
PH02Gene19042	PH02Gene03793	0.971824
PH02Gene19042	PH02Gene08452	0.855381
PH02Gene19042	PH02Gene23137	0.723156
PH02Gene20021	PH02Gene40116	0.716144
PH02Gene20074	PH02Gene06655	0.719223
PH02Gene20074	PH02Gene23138	0.846948
PH02Gene20528	PH02Gene03697	0.807537
PH02Gene20528	PH02Gene04447	0.734334
PH02Gene20528	PH02Gene08453	0.738137
PH02Gene20528	PH02Gene22501	0.816756
PH02Gene20528	PH02Gene25511	0.806425
PH02Gene20528	PH02Gene25625	0.747858
PH02Gene20528	PH02Gene28903	0.852174
PH02Gene20528	PH02Gene34989	0.809153
PH02Gene20528	PH02Gene42850	0.700765
PH02Gene20528	PH02Gene48963	0.754878
PH02Gene22138	PH02Gene01698	0.885776
PH02Gene22138	PH02Gene22533	0.738636
PH02Gene22138	PH02Gene27012	0.76493
PH02Gene22138	PH02Gene27013	0.717299
PH02Gene22138	PH02Gene31552	0.79461
PH02Gene22501	PH02Gene03697	0.861863
PH02Gene22501	PH02Gene04447	0.707117
PH02Gene22501	PH02Gene08453	0.849067
PH02Gene22501	PH02Gene27016	0.844501
PH02Gene22501	PH02Gene30508	0.830705
PH02Gene22501	PH02Gene47460	0.864569
PH02Gene22533	PH02Gene27012	0.905819
PH02Gene22533	PH02Gene27013	0.867263
PH02Gene22533	PH02Gene27014	0.835725
PH02Gene22533	PH02Gene40449	0.840781
PH02Gene24107	PH02Gene30509	0.843093
PH02Gene25511	PH02Gene03697	0.827102
PH02Gene25511	PH02Gene06655	0.922205
PH02Gene25511	PH02Gene06795	0.944781
PH02Gene25511	PH02Gene08453	0.762857
PH02Gene25511	PH02Gene14706	0.857269
PH02Gene25511	PH02Gene17241	0.734455
PH02Gene25511	PH02Gene22501	0.877719
PH02Gene25511	PH02Gene23138	0.735009
PH02Gene25511	PH02Gene25625	0.798769
PH02Gene25511	PH02Gene27016	0.84602
PH02Gene25511	PH02Gene28903	0.938703
PH02Gene25511	PH02Gene30508	0.873322
PH02Gene25511	PH02Gene34989	0.878132
PH02Gene25511	PH02Gene42850	0.957375
PH02Gene25511	PH02Gene47460	0.868791
PH02Gene25511	PH02Gene48963	0.852385
PH02Gene25609	PH02Gene25559	0.851417
PH02Gene25625	PH02Gene03697	0.803886
PH02Gene25625	PH02Gene04447	0.761878
PH02Gene25625	PH02Gene08453	0.721719
PH02Gene25625	PH02Gene22501	0.836965
PH02Gene25625	PH02Gene34989	0.880609
PH02Gene27013	PH02Gene27012	0.957907
PH02Gene27013	PH02Gene40449	0.922944
PH02Gene27014	PH02Gene27012	0.962973
PH02Gene27014	PH02Gene27013	0.920412
PH02Gene27014	PH02Gene40449	0.994444
PH02Gene28140	PH02Gene04803	0.834566
PH02Gene28141	PH02Gene03593	0.739878
PH02Gene28141	PH02Gene47111	0.720189
PH02Gene28141	PH02Gene48782	0.867764
PH02Gene28903	PH02Gene03697	0.826209
PH02Gene28903	PH02Gene06655	0.807285
PH02Gene28903	PH02Gene06795	0.901178
PH02Gene28903	PH02Gene08453	0.797811
PH02Gene28903	PH02Gene14706	0.876106
PH02Gene28903	PH02Gene22501	0.905576
PH02Gene28903	PH02Gene25625	0.762554
PH02Gene28903	PH02Gene27016	0.883089
PH02Gene28903	PH02Gene30508	0.865361
PH02Gene28903	PH02Gene34989	0.782115
PH02Gene28903	PH02Gene47460	0.900035
PH02Gene28903	PH02Gene48963	0.752655
PH02Gene29718	PH02Gene03793	0.737474
PH02Gene29718	PH02Gene47111	0.928575
PH02Gene30039	PH02Gene06795	0.815409
PH02Gene30039	PH02Gene20528	0.812071
PH02Gene30039	PH02Gene22501	0.778776
PH02Gene30039	PH02Gene25511	0.83295
PH02Gene30039	PH02Gene27016	0.845317
PH02Gene30039	PH02Gene28903	0.902695
PH02Gene30039	PH02Gene30508	0.789252
PH02Gene30039	PH02Gene30639	0.706885
PH02Gene30039	PH02Gene42850	0.857561
PH02Gene30039	PH02Gene47460	0.866097
PH02Gene30508	PH02Gene27016	0.977446
PH02Gene30509	PH02Gene40450	0.759901
PH02Gene30639	PH02Gene27016	0.738254
PH02Gene30639	PH02Gene28903	0.741991
PH02Gene30639	PH02Gene47460	0.724605
PH02Gene31552	PH02Gene22533	0.886793
PH02Gene31552	PH02Gene27012	0.983424
PH02Gene31552	PH02Gene27013	0.937748
PH02Gene31552	PH02Gene27014	0.942007
PH02Gene31552	PH02Gene40449	0.944643
PH02Gene32193	PH02Gene04631	0.83162
PH02Gene32193	PH02Gene08453	0.726672
PH02Gene32193	PH02Gene42739	0.790739
PH02Gene32193	PH02Gene42984	0.815327
PH02Gene32740	PH02Gene04803	0.710711
PH02Gene32740	PH02Gene09462	0.763173
PH02Gene32740	PH02Gene13789	0.814805
PH02Gene32740	PH02Gene28140	0.723319
PH02Gene34362	PH02Gene03593	0.841525
PH02Gene34362	PH02Gene18882	0.775068
PH02Gene34362	PH02Gene28141	0.741103
PH02Gene34362	PH02Gene29718	0.723563
PH02Gene34362	PH02Gene47111	0.733686
PH02Gene34362	PH02Gene48286	0.759821
PH02Gene34362	PH02Gene48782	0.783093
PH02Gene34989	PH02Gene03697	0.808595
PH02Gene34989	PH02Gene22501	0.838302
PH02Gene34989	PH02Gene23138	0.742713
PH02Gene38043	PH02Gene04803	0.812404
PH02Gene38043	PH02Gene28140	0.789843
PH02Gene38043	PH02Gene39642	0.788262
PH02Gene38043	PH02Gene49207	0.907124
PH02Gene38755	PH02Gene08873	0.718101
PH02Gene38755	PH02Gene25559	0.834726
PH02Gene38755	PH02Gene25609	0.953329
PH02Gene39617	PH02Gene02562	0.83763
PH02Gene39617	PH02Gene03697	0.82575
PH02Gene39617	PH02Gene04778	0.74797
PH02Gene39617	PH02Gene05362	0.783842
PH02Gene39617	PH02Gene06655	0.891569
PH02Gene39617	PH02Gene06795	0.783682
PH02Gene39617	PH02Gene08453	0.813708
PH02Gene39617	PH02Gene11141	0.901888
PH02Gene39617	PH02Gene14706	0.813617
PH02Gene39617	PH02Gene17241	0.863634
PH02Gene39617	PH02Gene22501	0.83368
PH02Gene39617	PH02Gene23138	0.901117
PH02Gene39617	PH02Gene25511	0.827938
PH02Gene39617	PH02Gene25625	0.735072
PH02Gene39617	PH02Gene28903	0.769001
PH02Gene39617	PH02Gene30508	0.746388
PH02Gene39617	PH02Gene34989	0.799104
PH02Gene39617	PH02Gene42850	0.725331
PH02Gene39617	PH02Gene42984	0.78704
PH02Gene39617	PH02Gene47460	0.709443
PH02Gene39617	PH02Gene48085	0.758992
PH02Gene39617	PH02Gene48963	0.784162
PH02Gene39642	PH02Gene32740	0.72112
PH02Gene39642	PH02Gene49207	0.924157
PH02Gene40116	PH02Gene09462	0.722622
PH02Gene40449	PH02Gene27012	0.967794
PH02Gene42027	PH02Gene04631	0.783754
PH02Gene42027	PH02Gene12618	0.780047
PH02Gene42027	PH02Gene42739	0.794064
PH02Gene42850	PH02Gene03697	0.730461
PH02Gene42850	PH02Gene06655	0.889729
PH02Gene42850	PH02Gene06795	0.974758
PH02Gene42850	PH02Gene14706	0.863398
PH02Gene42850	PH02Gene22501	0.773707
PH02Gene42850	PH02Gene27016	0.846646
PH02Gene42850	PH02Gene28903	0.897419
PH02Gene42850	PH02Gene30508	0.877833
PH02Gene42850	PH02Gene34989	0.78201
PH02Gene42850	PH02Gene47460	0.86757
PH02Gene42850	PH02Gene48963	0.739133
PH02Gene42984	PH02Gene03697	0.736765
PH02Gene42984	PH02Gene08453	0.882469
PH02Gene42984	PH02Gene18490	0.815891
PH02Gene42984	PH02Gene22501	0.715494
PH02Gene42984	PH02Gene42739	0.708573
PH02Gene44160	PH02Gene48685	0.737063
PH02Gene44264	PH02Gene30509	0.755947
PH02Gene45698	PH02Gene30509	0.731074
PH02Gene46268	PH02Gene48149	0.786848
PH02Gene46268	PH02Gene51351	0.757236
PH02Gene47111	PH02Gene03593	0.786204
PH02Gene47111	PH02Gene27013	0.726151
PH02Gene47460	PH02Gene08453	0.720946
PH02Gene47460	PH02Gene27016	0.991117
PH02Gene47460	PH02Gene30508	0.981235
PH02Gene48085	PH02Gene04631	0.778355
PH02Gene48085	PH02Gene08453	0.830145
PH02Gene48085	PH02Gene22501	0.834743
PH02Gene48085	PH02Gene25625	0.779183
PH02Gene48085	PH02Gene27016	0.729667
PH02Gene48085	PH02Gene28903	0.742491
PH02Gene48085	PH02Gene30508	0.72931
PH02Gene48085	PH02Gene32193	0.733384
PH02Gene48085	PH02Gene42739	0.792791
PH02Gene48085	PH02Gene42984	0.753635
PH02Gene48085	PH02Gene47460	0.732265
PH02Gene48286	PH02Gene03593	0.814308
PH02Gene48286	PH02Gene30509	0.764697
PH02Gene48286	PH02Gene40450	0.796863
PH02Gene48286	PH02Gene48782	0.893512
PH02Gene48782	PH02Gene03593	0.799707
PH02Gene48963	PH02Gene03697	0.846666
PH02Gene48963	PH02Gene04447	0.783695
PH02Gene48963	PH02Gene06655	0.809051
PH02Gene48963	PH02Gene22501	0.771012
PH02Gene48963	PH02Gene23138	0.746647
PH02Gene48963	PH02Gene25625	0.903999
PH02Gene48963	PH02Gene34989	0.896834
PH02Gene49207	PH02Gene04803	0.729084
PH02Gene49207	PH02Gene28140	0.717958
PH02Gene49207	PH02Gene32740	0.720626
PH02Gene50047	PH02Gene06795	0.818639
PH02Gene50047	PH02Gene14706	0.714732
PH02Gene50047	PH02Gene20528	0.770445
PH02Gene50047	PH02Gene22501	0.781523
PH02Gene50047	PH02Gene25511	0.829166
PH02Gene50047	PH02Gene27016	0.885334
PH02Gene50047	PH02Gene28903	0.909412
PH02Gene50047	PH02Gene30039	0.991242
PH02Gene50047	PH02Gene30508	0.823941
PH02Gene50047	PH02Gene30639	0.723616
PH02Gene50047	PH02Gene42850	0.858356
PH02Gene50047	PH02Gene47460	0.893249
