# Supplementary material for: Homo- and Hetero-Dimers of CAD Enzymes Regulate Lignification and Abiotic Stress Response in Moso Bamboo
Source: Int J Mol Sci. 2021 Nov 29;22(23):12917. doi: 10.3390/ijms222312917 (PMC8657895; doi:10.3390/ijms222312917)
Supplement: Supplementary file 1 [file ijms-22-12917-s001.zip › Supplementary files/Table S5.xlsx]

## Sheet: Sheet1
Table S5: Annotation of genes co-expressed with PheCAD genes
CAD Gene	Co-expression Gene ID	Ortholog(AT)	Blast Value	Annotation
PheCAD1	PH02V02Gene16624	-	-	-
PheCAD1	PH02V02Gene46268	-	-	-
PheCAD1	PH02V02Gene31068	-	-	-
PheCAD1	PH02V02Gene00148	-	-	-
PheCAD1	PH02V02Gene27187	-	-	-
PheCAD1	PH02V02Gene00740	-	-	-
PheCAD1	PH02V02Gene46454	-	-	-
PheCAD1	PH02V02Gene03222	-	-	-
PheCAD1	PH02V02Gene39875	AT1G19740	9.6e-50	ATP-dependent protease La (LON) domain protein
PheCAD1	PH02V02Gene29174	AT5G20080	5e-123	FAD/NAD(P)-binding oxidoreductase
PheCAD1	PH02V02Gene18021	AT2G30470	7e-169	high-level expression of sugar-inducible gene 2
PheCAD1	PH02V02Gene40677	AT2G05990	1e-141	NAD(P)-binding Rossmann-fold superfamily protein
PheCAD1	PH02V02Gene18568	AT3G04600	0	Nucleotidylyl transferase superfamily protein
PheCAD1	PH02V02Gene24749	AT1G20030	4e-71	Pathogenesis-related thaumatin superfamily protein
PheCAD1	PH02V02Gene50183	AT5G50280	1e-177	Pentatricopeptide repeat (PPR) superfamily protein
PheCAD1	PH02V02Gene00255	AT1G01050	1e-101	pyrophosphorylase 1
PheCAD1	PH02V02Gene01028	AT1G14180	5.5e-23	RING/U-box superfamily protein
PheCAD2	PH02V02Gene04721	-	-	-
PheCAD2	PH02V02Gene51147	-	-	-
PheCAD2	PH02V02Gene19157	AT1G78770	0	anaphase promoting complex 6
PheCAD2	PH02V02Gene07459	AT1G16610	6.8e-36	arginine/serine-rich 45
PheCAD2	PH02V02Gene36148	AT1G21780	1e-105	BTB/POZ domain-containing protein
PheCAD2	PH02V02Gene37615	AT1G07270	3e-134	Cell division control, Cdc6
PheCAD2	PH02V02Gene39241	AT3G06400	0	chromatin-remodeling protein 11
PheCAD2	PH02V02Gene06734	AT2G32010	3e-178	CVP2 like 1
PheCAD2	PH02V02Gene49103	AT1G35630	9e-85	Protease-associated (PA) RING/U-box zinc finger family protein
PheCAD2	PH02V02Gene33645	AT3G61740	0	SET domain protein 14
PheCAD2	PH02V02Gene43777	AT3G20630	0	ubiquitin-specific protease 14
PheCAD2	PH02V02Gene39617	AT5G10010	9e-106	unknown protein
PheCAD2	PH02V02Gene25876	AT2G21980	1e-18	unknown protein
PheCAD2	PH02V02Gene05719	AT4G25670	9e-22	unknown protein
PheCAD3	PH02V02Gene28608	-	-	-
PheCAD3	PH02V02Gene22670	-	-	-
PheCAD3	PH02V02Gene21680	-	-	-
PheCAD3	PH02V02Gene46895	-	-	-
PheCAD3	PH02V02Gene18655	-	-	-
PheCAD3	PH02V02Gene44961	-	-	-
PheCAD3	PH02V02Gene03080	AT5G22080	1.7e-86	Chaperone DnaJ-domain superfamily protein
PheCAD3	PH02V02Gene36317	AT2G38000	7e-138	chaperone protein dnaJ-related
PheCAD3	PH02V02Gene42319	AT3G62120	0	Class II aaRS and biotin synthetases superfamily protein
PheCAD3	PH02V02Gene06593	AT1G11940	8.4e-93	Core-2/I-branching beta-1,6-N-acetylglucosaminyltransferase family protein
PheCAD3	PH02V02Gene31922	AT4G18260	6.7e-51	Cytochrome b561/ferric reductase transmembrane protein family
PheCAD3	PH02V02Gene48468	AT3G14660	2e-154	cytochrome P450, family 72, subfamily A, polypeptide 13
PheCAD3	PH02V02Gene36340	AT1G54570	1e-163	Esterase/lipase/thioesterase family protein
PheCAD3	PH02V02Gene29865	AT5G55050	1.2e-66	GDSL-like Lipase/Acylhydrolase superfamily protein
PheCAD3	PH02V02Gene38643	AT3G62760	5.6e-54	Glutathione S-transferase family protein
PheCAD3	PH02V02Gene39935	AT3G47960	5e-138	Major facilitator superfamily protein
PheCAD3	PH02V02Gene42119	AT1G07440	2e-70	NAD(P)-binding Rossmann-fold superfamily protein
PheCAD3	PH02V02Gene42137	AT1G21000	3.9e-67	PLATZ transcription factor family protein
PheCAD3	PH02V02Gene44739	AT1G21000	1.1e-72	PLATZ transcription factor family protein
PheCAD3	PH02V02Gene19703	AT1G26150	2e-131	proline-rich extensin-like receptor kinase 10
PheCAD3	PH02V02Gene22949	AT1G22160	2e-13	Protein of unknown function (DUF581)
PheCAD3	PH02V02Gene33582	AT2G43120	5.1e-81	RmlC-like cupins superfamily protein
PheCAD3	PH02V02Gene50338	AT1G22180	1.5e-58	Sec14p-like phosphatidylinositol transfer family protein
PheCAD3	PH02V02Gene05440	AT5G57345	4e-19	unknown protein
PheCAD3	PH02V02Gene07724	AT3G09050	7.4e-56	unknown protein
PheCAD3	PH02V02Gene38470	AT1G67030	1.9e-17	zinc finger protein 6
PheCAD4	PH02V02Gene02127	-	-	-
PheCAD4	PH02V02Gene44682	-	-	-
PheCAD4	PH02V02Gene43273	-	-	-
PheCAD4	PH02V02Gene21505	-	-	-
PheCAD4	PH02V02Gene30626	-	-	-
PheCAD4	PH02V02Gene35480	-	-	-
PheCAD4	PH02V02Gene34490	-	-	-
PheCAD4	PH02V02Gene19952	-	-	-
PheCAD4	PH02V02Gene13509	-	-	-
PheCAD4	PH02V02Gene24981	-	-	-
PheCAD4	PH02V02Gene11886	-	-	-
PheCAD4	PH02V02Gene19476	-	-	-
PheCAD4	PH02V02Gene13211	-	-	-
PheCAD4	PH02V02Gene31210	-	-	-
PheCAD4	PH02V02Gene17404	-	-	-
PheCAD4	PH02V02Gene00502	-	-	-
PheCAD4	PH02V02Gene08226	-	-	-
PheCAD4	PH02V02Gene12223	AT3G63400	3.1e-67	Cyclophilin-like peptidyl-prolyl cis-trans isomerase family protein
PheCAD4	PH02V02Gene37888	AT5G58730	6.4e-16	pfkB-like carbohydrate kinase family protein
PheCAD4	PH02V02Gene13336	AT2G24020	1.2e-11	Uncharacterised BCR, YbaB family COG0718
PheCAD4	PH02V02Gene35927	AT4G27510	2.4e-15	unknown protein
PheCAD5	PH02V02Gene16289	-	-	-
PheCAD5	PH02V02Gene36829	-	-	-
PheCAD5	PH02V02Gene05551	-	-	-
PheCAD5	PH02V02Gene16335	-	-	-
PheCAD5	PH02V02Gene06107	-	-	-
PheCAD5	PH02V02Gene02642	-	-	-
PheCAD5	PH02V02Gene04135	-	-	-
PheCAD5	PH02V02Gene44816	-	-	-
PheCAD5	PH02V02Gene51107	AT1G35190	3e-47	2-oxoglutarate (2OG) and Fe(II)-dependent oxygenase superfamily protein
PheCAD5	PH02V02Gene02072	AT3G48980	3e-109	Arabidopsis thaliana protein of unknown function (DUF821)
PheCAD5	PH02V02Gene15870	AT1G27770	0	autoinhibited Ca2+-ATPase 1
PheCAD5	PH02V02Gene24355	AT1G27770	0	autoinhibited Ca2+-ATPase 1
PheCAD5	PH02V02Gene40402	AT2G31260	0	autophagy 9 (APG9)
PheCAD5	PH02V02Gene20533	AT2G21230	1.4e-64	Basic-leucine zipper (bZIP) transcription factor family protein
PheCAD5	PH02V02Gene21793	AT3G05580	1e-142	Calcineurin-like metallo-phosphoesterase superfamily protein
PheCAD5	PH02V02Gene25358	AT3G05580	4e-144	Calcineurin-like metallo-phosphoesterase superfamily protein
PheCAD5	PH02V02Gene06188	AT3G09960	1.7e-44	Calcineurin-like metallo-phosphoesterase superfamily protein
PheCAD5	PH02V02Gene48548	AT4G23650	0	calcium-dependent protein kinase 6
PheCAD5	PH02V02Gene16721	AT2G27030	1.7e-80	calmodulin 5
PheCAD5	PH02V02Gene07463	AT2G18465	6.7e-24	Chaperone DnaJ-domain superfamily protein
PheCAD5	PH02V02Gene09548	AT1G04400	0	cryptochrome 2
PheCAD5	PH02V02Gene46999	AT1G26830	3e-151	cullin 3
PheCAD5	PH02V02Gene33658	AT5G35560	6e-141	DENN (AEX-3) domain-containing protein
PheCAD5	PH02V02Gene24092	AT2G20900	0	diacylglycerol kinase 5
PheCAD5	PH02V02Gene22759	AT5G15380	1e-143	domains rearranged methylase 1
PheCAD5	PH02V02Gene32205	AT1G55500	2.9e-71	evolutionarily conserved C-terminal region 4
PheCAD5	PH02V02Gene37038	AT1G69630	2.9e-20	F-box/RNI-like superfamily protein
PheCAD5	PH02V02Gene21708	AT1G77810	5e-148	Galactosyltransferase family protein
PheCAD5	PH02V02Gene27668	AT2G38650	6e-150	galacturonosyltransferase 7
PheCAD5	PH02V02Gene29239	AT2G30810	1.9e-28	Gibberellin-regulated family protein
PheCAD5	PH02V02Gene38695	AT3G47000	0	Glycosyl hydrolase family protein
PheCAD5	PH02V02Gene36777	AT1G15740	1e-172	Leucine-rich repeat family protein
PheCAD5	PH02V02Gene24868	AT3G14460	8e-64	LRR and NB-ARC domains-containing disease resistance protein
PheCAD5	PH02V02Gene45651	AT1G29820	1e-152	Magnesium transporter CorA-like family protein
PheCAD5	PH02V02Gene02975	AT2G16640	0	multimeric translocon complex in the outer envelope membrane 132
PheCAD5	PH02V02Gene13973	AT2G26960	4.3e-53	myb domain protein 81
PheCAD5	PH02V02Gene13659	AT5G37830	5e-143	oxoprolinase 1
PheCAD5	PH02V02Gene28032	AT1G35620	5e-144	PDI-like 5-2
PheCAD5	PH02V02Gene36560	AT2G44140	6e-118	Peptidase family C54 protein
PheCAD5	PH02V02Gene39150	AT3G10250	8.7e-77	Plant protein 1589 of unknown function
PheCAD5	PH02V02Gene17448	AT1G28090	2e-123	Polynucleotide adenylyltransferase family protein
PheCAD5	PH02V02Gene22318	AT3G01490	2e-174	Protein kinase superfamily protein
PheCAD5	PH02V02Gene02935	AT5G47380	4e-133	Protein of unknown function, DUF547
PheCAD5	PH02V02Gene38471	AT1G09160	2e-154	Protein phosphatase 2C family protein
PheCAD5	PH02V02Gene30035	AT1G47380	4e-162	Protein phosphatase 2C family protein
PheCAD5	PH02V02Gene09429	AT1G47380	2e-165	Protein phosphatase 2C family protein
PheCAD5	PH02V02Gene10382	AT1G63120	7.9e-85	RHOMBOID-like 2
PheCAD5	PH02V02Gene50245	AT4G32670	3.8e-78	RING/FYVE/PHD zinc finger superfamily protein
PheCAD5	PH02V02Gene27946	AT3G63530	7e-64	RING/U-box superfamily protein
PheCAD5	PH02V02Gene48417	AT4G25180	6.4e-31	RNA polymerase III RPC4
PheCAD5	PH02V02Gene27278	AT4G17720	1e-87	RNA-binding (RRM/RBD/RNP motifs) family protein
PheCAD5	PH02V02Gene04796	AT5G58050	0	SHV3-like 4
PheCAD5	PH02V02Gene35427	AT5G66920	0	SKU5 similar 17
PheCAD5	PH02V02Gene13910	AT1G15760	2.4e-26	Sterile alpha motif (SAM) domain-containing protein
PheCAD5	PH02V02Gene35453	AT1G04950	1e-173	TATA BOX ASSOCIATED FACTOR II 59
PheCAD5	PH02V02Gene01764	AT1G61120	9.5e-77	terpene synthase 04
PheCAD5	PH02V02Gene01712	AT1G71060	4e-111	Tetratricopeptide repeat (TPR)-like superfamily protein
PheCAD5	PH02V02Gene21234	AT1G64230	9.4e-84	ubiquitin-conjugating enzyme 28
PheCAD5	PH02V02Gene26479	AT1G53025	8.7e-83	Ubiquitin-conjugating enzyme family protein
PheCAD5	PH02V02Gene11494	AT3G11670	0	UDP-Glycosyltransferase superfamily protein
PheCAD5	PH02V02Gene09509	AT3G12010	0	unknown protein
PheCAD5	PH02V02Gene17575	AT2G30530	3.4e-55	unknown protein
PheCAD5	PH02V02Gene12794	AT5G55060	1e-140	unknown protein
PheCAD5	PH02V02Gene03973	AT3G03090	1e-176	vacuolar glucose transporter 1
PheCAD5	PH02V02Gene02755	AT2G18800	2e-104	xyloglucan endotransglucosylase/hydrolase 21
PheCAD6	PH02V02Gene41811	-	-	-
PheCAD6	PH02V02Gene12405	-	-	-
PheCAD6	PH02V02Gene36565	-	-	-
PheCAD6	PH02V02Gene02266	-	-	-
PheCAD6	PH02V02Gene39093	-	-	-
PheCAD6	PH02V02Gene39690	AT1G11360	4e-69	Adenine nucleotide alpha hydrolases-like superfamily protein
PheCAD6	PH02V02Gene44779	AT3G11200	1.2e-85	alfin-like 2
PheCAD6	PH02V02Gene10922	AT2G45850	1.6e-43	AT hook motif DNA-binding family protein
PheCAD6	PH02V02Gene37192	AT2G39760	2.2e-60	BTB/POZ/MATH-domains containing protein
PheCAD6	PH02V02Gene35946	AT2G01710	2.5e-35	Chaperone DnaJ-domain superfamily protein
PheCAD6	PH02V02Gene08710	AT1G11480	3e-52	eukaryotic translation initiation factor-related
PheCAD6	PH02V02Gene30173	AT3G62980	0	F-box/RNI-like superfamily protein
PheCAD6	PH02V02Gene38962	AT3G62980	0	F-box/RNI-like superfamily protein
PheCAD6	PH02V02Gene00083	AT1G07940	0	GTP binding Elongation factor Tu family protein
PheCAD6	PH02V02Gene45493	AT1G56210	9.8e-18	Heavy metal transport/detoxification superfamily protein
PheCAD6	PH02V02Gene10564	AT1G16710	0	histone acetyltransferase of the CBP family 12
PheCAD6	PH02V02Gene04648	AT1G76490	0	hydroxy methylglutaryl CoA reductase 1
PheCAD6	PH02V02Gene12470	AT4G08150	1.2e-88	KNOTTED-like from Arabidopsis thaliana
PheCAD6	PH02V02Gene32261	AT1G62360	1.2e-77	KNOX/ELK homeobox transcription factor
PheCAD6	PH02V02Gene46937	AT3G23550	2e-144	MATE efflux family protein
PheCAD6	PH02V02Gene19889	AT1G72820	2.3e-82	Mitochondrial substrate carrier family protein
PheCAD6	PH02V02Gene08133	AT1G66480	3.1e-28	plastid movement impaired 2
PheCAD6	PH02V02Gene49233	AT3G15340	2e-40	proton pump interactor 2
PheCAD6	PH02V02Gene33507	AT5G15200	3.8e-88	Ribosomal protein S4
PheCAD6	PH02V02Gene15322	AT4G24390	6e-163	RNI-like superfamily protein
PheCAD6	PH02V02Gene29739	AT3G18380	8.1e-86	sequence-specific DNA binding transcription factors;sequence-specific DNA binding
PheCAD6	PH02V02Gene48724	AT3G07760	3.9e-62	Sterile alpha motif (SAM) domain-containing protein
PheCAD6	PH02V02Gene38512	AT2G16780	6e-124	Transducin family protein / WD-40 repeat family protein
PheCAD6	PH02V02Gene04268	AT1G27650	1.8e-96	U2 snRNP auxiliary factor small subunit, putative
PheCAD6	PH02V02Gene00495	AT1G72270	3.4e-57	unknown protein
PheCAD6	PH02V02Gene42325	AT4G39410	1.1e-43	WRKY DNA-binding protein 13
PheCAD6	PH02V02Gene02009	AT2G44745	3.4e-47	WRKY family transcription factor
PheCAD6	PH02V02Gene48202	AT3G02820	2.8e-59	zinc knuckle (CCHC-type) family protein
PheCAD7	PH02V02Gene14161	AT1G62850	2.8e-67	-
PheCAD7	PH02V02Gene22517	-	-	-
PheCAD7	PH02V02Gene20972	-	-	-
PheCAD7	PH02V02Gene37509	-	-	-
PheCAD7	PH02V02Gene05108	-	-	-
PheCAD7	PH02V02Gene08421	AT4G35450	5e-109	ankyrin repeat-containing protein 2
PheCAD7	PH02V02Gene02176	AT1G44790	3.8e-66	ChaC-like family protein
PheCAD7	PH02V02Gene18241	AT1G77930	5.3e-82	Chaperone DnaJ-domain superfamily protein
PheCAD7	PH02V02Gene42319	AT3G62120	0	Class II aaRS and biotin synthetases superfamily protein
PheCAD7	PH02V02Gene35909	AT3G14650	1e-146	cytochrome P450, family 72, subfamily A, polypeptide 11
PheCAD7	PH02V02Gene36899	AT2G28150	1.4e-86	Domain of unknown function (DUF966)
PheCAD7	PH02V02Gene41497	AT3G18170	1.3e-91	Glycosyltransferase family 61 protein
PheCAD7	PH02V02Gene30721	AT2G44100	0	guanosine nucleotide diphosphate dissociation inhibitor 1
PheCAD7	PH02V02Gene24440	AT1G47510	5.2e-78	inositol polyphosphate 5-phosphatase 11
PheCAD7	PH02V02Gene36896	AT5G58330	0	lactate/malate dehydrogenase family protein
PheCAD7	PH02V02Gene34287	AT2G34460	5.6e-90	NAD(P)-binding Rossmann-fold superfamily protein
PheCAD7	PH02V02Gene02416	AT5G17770	4e-124	NADH:cytochrome B5 reductase 1
PheCAD7	PH02V02Gene48867	AT3G07040	4.1e-53	NB-ARC domain-containing disease resistance protein
PheCAD7	PH02V02Gene43578	AT4G09320	5.8e-65	Nucleoside diphosphate kinase family protein
PheCAD7	PH02V02Gene40781	AT3G52155	9.6e-48	Phosphoglycerate mutase family protein
PheCAD7	PH02V02Gene13191	AT5G58140	0	phototropin 2
PheCAD7	PH02V02Gene10432	AT4G14210	0	phytoene desaturase 3
PheCAD7	PH02V02Gene23469	AT1G65260	6.5e-98	plastid transcriptionally active 4
PheCAD7	PH02V02Gene19703	AT1G26150	2e-131	proline-rich extensin-like receptor kinase 10
PheCAD7	PH02V02Gene32740	AT5G16810	2e-129	Protein kinase superfamily protein
PheCAD7	PH02V02Gene49192	AT5G16810	2e-130	Protein kinase superfamily protein
PheCAD7	PH02V02Gene10468	AT1G54610	0	Protein kinase superfamily protein
PheCAD7	PH02V02Gene43488	AT3G19800	1.4e-36	Protein of unknown function (DUF177)
PheCAD7	PH02V02Gene12930	AT4G09720	5.8e-90	RAB GTPase homolog G3A
PheCAD7	PH02V02Gene16991	AT4G14710	5.8e-92	RmlC-like cupins superfamily protein
PheCAD7	PH02V02Gene07307	AT1G01630	2.3e-73	Sec14p-like phosphatidylinositol transfer family protein
PheCAD7	PH02V02Gene27793	AT1G61250	1.3e-82	secretory carrier 3
PheCAD7	PH02V02Gene39566	AT2G26740	4.7e-72	soluble epoxide hydrolase
PheCAD7	PH02V02Gene18387	AT2G24060	2e-48	Translation initiation factor 3 protein
PheCAD7	PH02V02Gene06138	AT1G17200	3e-29	Uncharacterised protein family (UPF0497)
PheCAD7	PH02V02Gene17368	AT4G15545	9.9e-73	unknown protein
PheCAD7	PH02V02Gene47805	AT1G53450	3e-104	unknown protein
PheCAD7	PH02V02Gene08770	AT3G63270	8e-134	unknown protein
PheCAD7	PH02V02Gene12581	AT1G51600	9.3e-43	ZIM-LIKE 2
PheCAD8	PH02V02Gene00074	-	-	-
PheCAD8	PH02V02Gene18317	-	-	-
PheCAD8	PH02V02Gene25283	-	-	-
PheCAD8	PH02V02Gene13789	AT3G49810	6e-117	ARM repeat superfamily protein
PheCAD8	PH02V02Gene37930	AT5G49580	5e-160	Chaperone DnaJ-domain superfamily protein
PheCAD8	PH02V02Gene10493	AT1G47220	3.7e-85	Cyclin A3;3
PheCAD8	PH02V02Gene04546	AT2G26760	1.1e-94	Cyclin B1;4
PheCAD8	PH02V02Gene29851	AT4G19600	9.6e-81	Cyclin family protein
PheCAD8	PH02V02Gene37007	AT3G08790	1e-102	ENTH/VHS/GAT family protein
PheCAD8	PH02V02Gene12412	AT1G56460	5.6e-52	HIT zinc finger ;PAPA-1-like conserved region
PheCAD8	PH02V02Gene31219	AT3G14460	2e-70	LRR and NB-ARC domains-containing disease resistance protein
PheCAD8	PH02V02Gene33735	AT4G24520	0	P450 reductase 1
PheCAD8	PH02V02Gene05853	AT1G07370	5e-132	proliferating cellular nuclear antigen 1
PheCAD8	PH02V02Gene41788	AT3G05840	0	Protein kinase superfamily protein
PheCAD8	PH02V02Gene14789	AT1G09160	7e-164	Protein phosphatase 2C family protein
PheCAD8	PH02V02Gene35371	AT2G24490	4.5e-44	replicon protein A2
PheCAD8	PH02V02Gene26795	AT3G02400	1.9e-22	SMAD/FHA domain-containing protein
PheCAD8	PH02V02Gene27168	AT5G48390	0	Tetratricopeptide repeat (TPR)-like superfamily protein
PheCAD8	PH02V02Gene30978	AT4G17240	1.4e-42	unknown protein
PheCAD9	PH02V02Gene08462	-	-	-
PheCAD9	PH02V02Gene20372	-	-	-
PheCAD9	PH02V02Gene01653	-	-	-
PheCAD9	PH02V02Gene46466	-	-	-
PheCAD9	PH02V02Gene40361	-	-	-
PheCAD9	PH02V02Gene29229	-	-	-
PheCAD9	PH02V02Gene38025	AT2G27990	2.3e-68	BEL1-like homeodomain 8
PheCAD9	PH02V02Gene05318	AT1G68640	4e-97	bZIP transcription factor family protein
PheCAD9	PH02V02Gene43639	AT5G13890	1.7e-12	Family of unknown function (DUF716)
PheCAD9	PH02V02Gene01337	AT2G18380	1.7e-22	GATA transcription factor 20
PheCAD9	PH02V02Gene01637	AT4G00150	4.3e-77	GRAS family transcription factor
PheCAD9	PH02V02Gene21818	AT5G27690	6e-20	Heavy metal transport/detoxification superfamily protein
PheCAD9	PH02V02Gene10564	AT1G16710	0	histone acetyltransferase of the CBP family 12
PheCAD9	PH02V02Gene27982	AT2G17265	7.7e-98	homoserine kinase
PheCAD9	PH02V02Gene12328	AT1G01110	4.9e-91	IQ-domain 18
PheCAD9	PH02V02Gene13541	AT2G23300	9e-146	Leucine-rich repeat protein kinase family protein
PheCAD9	PH02V02Gene42950	AT2G24260	9.2e-53	LJRHL1-like 1
PheCAD9	PH02V02Gene26598	AT1G72090	9.7e-28	Methylthiotransferase
PheCAD9	PH02V02Gene01982	AT3G57560	8e-102	N-acetyl-l-glutamate kinase
PheCAD9	PH02V02Gene01871	AT1G63270	1.8e-87	non-intrinsic ABC protein 10
PheCAD9	PH02V02Gene32190	AT1G63270	2.7e-88	non-intrinsic ABC protein 10
PheCAD9	PH02V02Gene13969	AT1G52570	0	phospholipase D alpha 2
PheCAD9	PH02V02Gene11422	AT2G38070	2.1e-48	Protein of unknown function (DUF740)
PheCAD9	PH02V02Gene39871	AT1G12960	5.7e-30	Ribosomal protein L18e/L15 superfamily protein
PheCAD9	PH02V02Gene13596	AT3G15010	1.3e-74	RNA-binding (RRM/RBD/RNP motifs) family protein
PheCAD9	PH02V02Gene36808	AT4G30600	0	signal recognition particle receptor alpha subunit family protein
PheCAD9	PH02V02Gene39873	AT1G54140	1.2e-47	TATA binding protein associated factor 21kDa subunit
PheCAD9	PH02V02Gene19712	AT4G05440	1.1e-35	temperature sensing protein-related
PheCAD9	PH02V02Gene37048	AT1G31790	1.2e-41	Tetratricopeptide repeat (TPR)-like superfamily protein
PheCAD9	PH02V02Gene05658	AT2G01860	2.9e-98	Tetratricopeptide repeat (TPR)-like superfamily protein
PheCAD9	PH02V02Gene12081	AT5G65520	2.3e-32	Tetratricopeptide repeat (TPR)-like superfamily protein
PheCAD9	PH02V02Gene10886	AT2G25810	7.5e-74	tonoplast intrinsic protein 4;1
PheCAD9	PH02V02Gene29571	AT4G29830	6e-125	Transducin/WD40 repeat-like superfamily protein
PheCAD9	PH02V02Gene48025	AT2G37410	3e-66	translocase inner membrane subunit 17-2
PheCAD9	PH02V02Gene22332	AT3G11910	0	ubiquitin-specific protease 13
PheCAD9	PH02V02Gene15139	AT3G58800	1.5e-76	unknown protein
PheCAD10	PH02V02Gene06149	-	-	-
PheCAD10	PH02V02Gene12744	AT3G22110	2e-102	20S proteasome alpha subunit C1
PheCAD10	PH02V02Gene11281	AT4G34940	1e-134	armadillo repeat only 1
PheCAD10	PH02V02Gene38482	AT3G09030	2.3e-41	BTB/POZ domain-containing protein
PheCAD10	PH02V02Gene13790	AT1G10150	4.9e-60	Carbohydrate-binding protein
PheCAD10	PH02V02Gene01298	AT5G64360	4e-33	Chaperone DnaJ-domain superfamily protein
PheCAD10	PH02V02Gene19061	AT5G21482	8e-161	cytokinin oxidase 7
PheCAD10	PH02V02Gene32160	AT5G39450	1.7e-67	F-box family protein
PheCAD10	PH02V02Gene16755	AT5G23630	0	phosphate deficiency response 2
PheCAD10	PH02V02Gene27721	AT1G69910	2e-101	Protein kinase superfamily protein
PheCAD10	PH02V02Gene02156	AT3G11100	5.4e-39	sequence-specific DNA binding transcription factors
PheCAD10	PH02V02Gene30455	AT3G11100	1.6e-38	sequence-specific DNA binding transcription factors
PheCAD10	PH02V02Gene06124	AT3G01890	4e-152	SWIB/MDM2 domain superfamily protein
PheCAD10	PH02V02Gene40151	AT3G47890	0	Ubiquitin carboxyl-terminal hydrolase-related protein
PheCAD10	PH02V02Gene22332	AT3G11910	0	ubiquitin-specific protease 13
PheCAD11	PH02V02Gene50758	-	-	-
PheCAD11	PH02V02Gene03362	-	-	-
PheCAD11	PH02V02Gene51029	-	-	-
PheCAD11	PH02V02Gene02952	-	-	-
PheCAD11	PH02V02Gene00774	-	-	-
PheCAD11	PH02V02Gene16423	-	-	-
PheCAD11	PH02V02Gene33048	-	-	-
PheCAD11	PH02V02Gene01627	AT1G63680	0	acid-amino acid ligases;ligases;ATP binding;ATP binding;ligases
PheCAD11	PH02V02Gene50626	AT3G24560	1.7e-35	Adenine nucleotide alpha hydrolases-like superfamily protein
PheCAD11	PH02V02Gene46747	AT1G20220	1.1e-47	Alba DNA/RNA-binding protein
PheCAD11	PH02V02Gene39555	AT5G17250	0	Alkaline-phosphatase-like family protein
PheCAD11	PH02V02Gene28347	AT1G29840	7.6e-84	alpha/beta-Hydrolases superfamily protein
PheCAD11	PH02V02Gene31865	AT3G23070	0	CRM family member 3A
PheCAD11	PH02V02Gene38642	AT4G02570	0	cullin 1
PheCAD11	PH02V02Gene16476	AT4G26610	0	D6 protein kinase like 1
PheCAD11	PH02V02Gene00434	AT5G57330	2e-141	Galactose mutarotase-like superfamily protein
PheCAD11	PH02V02Gene47650	AT1G05700	1.7e-95	Leucine-rich repeat transmembrane protein kinase protein
PheCAD11	PH02V02Gene19151	AT1G62200	0	Major facilitator superfamily protein
PheCAD11	PH02V02Gene17038	AT2G21710	7e-174	Mitochondrial transcription termination factor family protein
PheCAD11	PH02V02Gene02778	AT1G10210	9e-179	mitogen-activated protein kinase 1
PheCAD11	PH02V02Gene07383	AT4G16070	4e-128	Mono-/di-acylglycerol lipase, N-terminal;Lipase, class 3
PheCAD11	PH02V02Gene34190	AT5G23540	1e-54	Mov34/MPN/PAD-1 family protein
PheCAD11	PH02V02Gene41022	AT2G01060	2.4e-69	myb-like HTH transcriptional regulator family protein
PheCAD11	PH02V02Gene07812	AT1G02560	4e-110	nuclear encoded CLP protease 5
PheCAD11	PH02V02Gene15215	AT5G35220	0	Peptidase M50 family protein
PheCAD11	PH02V02Gene45361	AT5G19750	7.7e-64	Peroxisomal membrane 22 kDa (Mpv17/PMP22) family protein
PheCAD11	PH02V02Gene37888	AT5G58730	6.4e-16	pfkB-like carbohydrate kinase family protein
PheCAD11	PH02V02Gene44128	AT5G42870	7e-161	phosphatidic acid phosphohydrolase 2
PheCAD11	PH02V02Gene21908	AT2G26570	4e-146	Plant protein of unknown function (DUF827)
PheCAD11	PH02V02Gene08335	AT1G08465	8.3e-43	Plant-specific transcription factor YABBY family protein
PheCAD11	PH02V02Gene24701	AT1G74210	8e-157	PLC-like phosphodiesterases superfamily protein
PheCAD11	PH02V02Gene28612	AT2G39140	2e-116	pseudouridine synthase family protein
PheCAD11	PH02V02Gene13791	AT1G49300	1.4e-97	RAB GTPase homolog G3E
PheCAD11	PH02V02Gene12052	AT1G55840	5e-131	Sec14p-like phosphatidylinositol transfer family protein
PheCAD11	PH02V02Gene48121	AT4G38020	7.8e-81	tRNA/rRNA methyltransferase (SpoU) family protein
PheCAD11	PH02V02Gene31871	AT4G27860	1.1e-30	vacuolar iron transporter (VIT) family protein
PheCAD12	PH02V02Gene37626	-	-	-
PheCAD12	PH02V02Gene10696	-	-	-
PheCAD12	PH02V02Gene49901	AT3G27670	2.3e-58	ARM repeat superfamily protein
PheCAD12	PH02V02Gene20766	AT1G21750	5e-161	PDI-like 1-1
PheCAD12	PH02V02Gene20448	AT2G05140	2.9e-47	phosphoribosylaminoimidazole carboxylase family protein / AIR carboxylase family protein
PheCAD12	PH02V02Gene33998	AT4G19006	2e-165	Proteasome component (PCI) domain protein
PheCAD12	PH02V02Gene22767	AT1G63780	1e-122	Ribosomal RNA processing Brix domain protein
PheCAD12	PH02V02Gene02941	AT1G52930	2e-130	Ribosomal RNA processing Brix domain protein
PheCAD12	PH02V02Gene19500	AT1G55325	0	RNA polymerase II transcription mediators
PheCAD12	PH02V02Gene15177	AT3G04740	0	RNA polymerase II transcription mediators
PheCAD12	PH02V02Gene30491	AT3G50670	1.8e-99	U1 small nuclear ribonucleoprotein-70K
PheCAD12	PH02V02Gene03839	AT1G78800	1.1e-72	UDP-Glycosyltransferase superfamily protein
PheCAD12	PH02V02Gene31432	AT5G48240	3.7e-42	unknown protein
PheCAD12	PH02V02Gene06974	AT1G65270	3.8e-73	unknown protein
PheCAD13	PH02V02Gene12884	-	-	-
PheCAD13	PH02V02Gene44785	-	-	-
PheCAD13	PH02V02Gene23946	-	-	-
PheCAD13	PH02V02Gene48685	AT2G19400	0	AGC (cAMP-dependent, cGMP-dependent and protein kinase C) kinase family protein
PheCAD13	PH02V02Gene43846	AT5G53350	1e-132	CLP protease regulatory subunit X
PheCAD13	PH02V02Gene32316	AT5G52800	3e-166	DNA primases
PheCAD13	PH02V02Gene04888	AT1G24150	1.3e-92	formin homologue 4
PheCAD13	PH02V02Gene21896	AT1G06230	9.2e-79	global transcription factor group E4
PheCAD13	PH02V02Gene00888	AT3G46290	5e-159	hercules receptor kinase 1
PheCAD13	PH02V02Gene43721	AT5G04290	1e-149	kow domain-containing transcription factor 1
PheCAD13	PH02V02Gene16345	AT3G15410	0	Leucine-rich repeat (LRR) family protein
PheCAD13	PH02V02Gene09740	AT1G18000	6e-152	Major facilitator superfamily protein
PheCAD13	PH02V02Gene47280	AT1G51660	5e-107	mitogen-activated protein kinase kinase 4
PheCAD13	PH02V02Gene07871	AT5G49880	4e-144	mitotic checkpoint family protein
PheCAD13	PH02V02Gene24817	AT4G29940	5.3e-76	pathogenesis related homeodomain protein A
PheCAD13	PH02V02Gene31479	AT2G15790	1e-158	peptidyl-prolyl cis-trans isomerase / cyclophilin-40 (CYP40) / rotamase
PheCAD13	PH02V02Gene20743	AT2G28320	0	Pleckstrin homology (PH) and lipid-binding START domains-containing protein
PheCAD13	PH02V02Gene40393	AT5G61450	4e-139	P-loop containing nucleoside triphosphate hydrolases superfamily protein
PheCAD13	PH02V02Gene15724	AT3G09880	3e-177	Protein phosphatase 2A regulatory B subunit family protein
PheCAD13	PH02V02Gene41723	AT1G03770	5.3e-70	RING 1B
PheCAD13	PH02V02Gene01748	AT1G79350	0	RING/FYVE/PHD zinc finger superfamily protein
PheCAD13	PH02V02Gene16657	AT1G79350	0	RING/FYVE/PHD zinc finger superfamily protein
PheCAD13	PH02V02Gene32841	AT1G79350	0	RING/FYVE/PHD zinc finger superfamily protein
PheCAD13	PH02V02Gene11399	AT1G05890	0	RING/U-box superfamily protein
PheCAD13	PH02V02Gene05923	AT1G08125	3e-100	S-adenosyl-L-methionine-dependent methyltransferases superfamily protein
PheCAD13	PH02V02Gene19638	AT1G02500	0	S-adenosylmethionine synthetase 1
PheCAD13	PH02V02Gene30119	AT1G33475	1.8e-33	SNARE-like superfamily protein
PheCAD13	PH02V02Gene12129	AT1G09070	6.4e-21	soybean gene regulated by cold-2
PheCAD13	PH02V02Gene42306	AT1G50300	3e-103	TBP-associated factor 15
PheCAD13	PH02V02Gene13029	AT2G34900	2.6e-75	Transcription factor GTE6
PheCAD13	PH02V02Gene25012	AT1G61210	3e-149	Transducin/WD40 repeat-like superfamily protein
PheCAD13	PH02V02Gene03374	AT5G24520	1e-119	Transducin/WD40 repeat-like superfamily protein
PheCAD13	PH02V02Gene01475	AT5G24520	7e-119	Transducin/WD40 repeat-like superfamily protein
PheCAD13	PH02V02Gene04375	AT5G58620	1e-119	zinc finger (CCCH-type) family protein
PheCAD14	PH02V02Gene19117	-	-	-
PheCAD14	PH02V02Gene37961	AT3G05420	2e-156	acyl-CoA binding protein 4
PheCAD14	PH02V02Gene00066	AT3G14980	5.9e-49	Acyl-CoA N-acyltransferase with RING/FYVE/PHD-type zinc finger protein
PheCAD14	PH02V02Gene47833	AT1G55620	0	chloride channel F
PheCAD14	PH02V02Gene06279	AT4G26870	2e-179	Class II aminoacyl-tRNA and biotin synthetases superfamily protein
PheCAD14	PH02V02Gene29349	AT1G52360	0	Coatomer, beta subunit
PheCAD14	PH02V02Gene18558	AT5G11980	0	conserved oligomeric Golgi complex component-related / COG complex component-related
PheCAD14	PH02V02Gene10667	AT5G20080	1e-122	FAD/NAD(P)-binding oxidoreductase
PheCAD14	PH02V02Gene00434	AT5G57330	2e-141	Galactose mutarotase-like superfamily protein
PheCAD14	PH02V02Gene20096	AT2G33040	9e-135	gamma subunit of Mt ATP synthase
PheCAD14	PH02V02Gene17493	AT1G16300	9e-170	glyceraldehyde-3-phosphate dehydrogenase of plastid 2
PheCAD14	PH02V02Gene50084	AT5G27390	8.9e-69	Mog1/PsbP/DUF1795-like photosystem II reaction center PsbP family protein
PheCAD14	PH02V02Gene16644	AT1G31070	0	N-acetylglucosamine-1-phosphate uridylyltransferase 1
PheCAD14	PH02V02Gene41040	AT1G06890	4e-134	nodulin MtN21 /EamA-like transporter family protein
PheCAD14	PH02V02Gene37365	AT2G35190	1.3e-92	novel plant snare 11
PheCAD14	PH02V02Gene01603	AT4G36650	1e-123	plant-specific TFIIB-related protein
PheCAD14	PH02V02Gene20649	AT1G65840	8e-154	polyamine oxidase 4
PheCAD14	PH02V02Gene33774	AT1G04430	0	S-adenosyl-L-methionine-dependent methyltransferases superfamily protein
PheCAD14	PH02V02Gene04778	AT4G22130	0	STRUBBELIG-receptor family 8
PheCAD14	PH02V02Gene20299	AT1G79990	0	structural molecules
PheCAD14	PH02V02Gene45043	AT5G51840	2.2e-54	unknown protein
PheCAD14	PH02V02Gene31087	AT3G57410	0	villin 3
