# Supplementary material for: Homo- and Hetero-Dimers of CAD Enzymes Regulate Lignification and Abiotic Stress Response in Moso Bamboo
Source: Int J Mol Sci. 2021 Nov 29;22(23):12917. doi: 10.3390/ijms222312917 (PMC8657895; doi:10.3390/ijms222312917)
Supplement: Supplementary file 1 [file ijms-22-12917-s001.zip › Supplementary files/Table S6.xlsx]

## Sheet: Sheet1
Table S6: Details of the primers used in this study
S. No	Primer name	Primer sequence 5ʹ - 3ʹ
List of PheCAD enzymes full length primers
1	PheCAD2_FL_F	TCTCGTTGCTACCTCGTCTA
2	PheCAD2_FL_R	GTGGTATTATGCATGGCAACTG
3	PheCAD8_FL_F	TGGACCTGGTACTCCCTTATT
4	PheCAD8_FL_R	CAGAAGCAAACGCAACCATC
5	PheCAD1_FL_F	GCTGCCACCGACGATAG
6	PheCAD1_FL_R	GACTGTGGACTGCGATGA
List of PheCAD enzymes primer used for pGBKT-7 and pGADT7 vectors
1	PheCAD2_BD_F	atggaggccgaattcccggggATGGGCAGCCTCGCTTCG
2	PheCAD2_BD_R	ccgctgcaggtcgacggatccTCAGGCGGCGTCCTCGAT
3	PheCAD8_BD_F	atggaggccgaattcccggggATGGAGCAAGGCAAGGC
4	PheCAD8_BD_R	ccgctgcaggtcgacggatccCTAGGCGGTGGAACCGA
5	PheCAD1_BD_F	atggaggccgaattcccggggATGGCTGCTGAATGCGA
6	PheCAD1_BD_R	ccgctgcaggtcgacggatccCTACTTGAAAGAGTTCTCTATGTCGA
7	PheCAD1_AD_F	gagtggccattatggcccgggATGGCTGCTGAATGCGA
8	PheCAD1_AD_R	gccgacatgttttttcccgggCTACTTGAAAGAGTTCTCTATGTCGA
9	PheCAD2_AD_F	gagtggccattatggcccgggATGGGCAGCCTCGCTTCG
10	PheCAD2_AD_R	gccgacatgttttttcccgggTCAGGCGGCGTCCTCGAT
11	PheCAD8_AD_F	gagtggccattatggcccgggATGGAGCAAGGCAAGGC
12	PheCAD8_AD_R	gccgacatgttttttcccgggCTAGGCGGTGGAACCGA
List of PheCAD enzymes primers used for SPYNE173 and SPYCE(M) vectors
1	Spy_NE_CE_PheCAD1_F	ggcctggcgcgccactagtATGGCTGCTGAATGCGAG
2	Spy_NE_CE_PheCAD1_R	cctcgaggtcgacagtactatcgatCTTGAAAGAGTTCTCTATGTCGATCA
3	Spy_NE_CE_PheCAD2_F	ggcctggcgcgccactagtATGGGCAGCCTCGCTTCG
4	Spy_NE_CE_PheCAD2_R	cctcgaggtcgacagtactatcgatGGCGGCGTCCTCGATGTT
5	Spy_NE_CE_PheCAD8_F	ggcctggcgcgccactagtATGGAGCAAGGCAAGGC
6	Spy_NE_CE_PheCAD8_R	cctcgaggtcgacagtactatcgatGGCGGTGGAACCGAGG
List of PheCAD enzymes primers used for pSAT-nEYFP-C1 and pSAT4-cEYFP-C1-B
1	PheCAD1_pSAT_F	agatctcgagctcaagcttcgATGGCTGCTGAATGCGAG
2	PheCAD1_pSAT_R	ggtaccgtcgactgcagaattCTACTTGAAAGAGTTCTCTATGTCGATCA
3	PheCAD2_pSAT_F	agatctcgagctcaagcttcgATGGGCAGCCTCGCTTCG
4	PheCAD2_pSAT_R	ggtaccgtcgactgcagaattTCAGGCGGCGTCCTCGATGTT
5	PheCAD8_pSAT_F	agatctcgagctcaagcttcgATGGAGCAAGGCAAGGC
6	PheCAD8_pSAT_R	ggtaccgtcgactgcagaattCTAGGCGGTGGAACCGAGG
* small letters indicates the vector adapter sequence and capital letters indicates the CDS sequence of the PheCAD enzymes
